# Supplementary material for: Spt-Ada-Gcn5-Acetyltransferase (SAGA) Complex in Plants: Genome Wide Identification, Evolutionary Conservation and Functional Determination
Source: PubMed Central journal article supplement (PMC4532415; doi:10.1371/journal.pone.0134709), 2015-08-11
Supplement: pone.0134709.s001.pdf [file pone.0134709.s001.pdf]

S1 Fig.

>GCN5\_BR

AT\_br\_459-559 -----QLNALMRALLKTMQDHADAWPFKEPVDSRDVDPYDIIKDPIDLKVIKRVESEQYVVTLDMEFVADARRMNFNNCRTYNSPDTIYYKCATRLETHFHHSKVA-----
Os\_br\_402-500 -----QLTNLMRSLKKNMNEHPDAWPFKEPVDSRDVDPYDIIKDPIDLKTMKSRVESEQYVVTLEMFVADMCRMFNSNAKTYNSPDTIYYKCASRLESFFSNKVASQLAQASTK
HS\_br\_727-826 -----QLYSTLKSILQQVSHQSAWPFMEPVKRTTEAPGYEVIRFPMDLKTMSERLKN-RYYVSKKLFMADLQRFVFNCKEYNNPPESEYYKCANILEKFFFSKIKE-----
Sc\_br\_331-431 DALAQRPKRGPHDAAIQNILTELQNHAAWPFQLQVNEKVEVPDYDFKPEPMDLSTMEIKLES-NKYYQKMEDFYDARLVFNCRMYNGENTSYYKYANRLEKFFNNKVEI-----
Clustal Consensus :: : \* :: \* \*\*\*\* : \*\* . : . \* . : \* : \* : \* : \* : \* : \* : \* : \* : \* : \* : \* : \* : \*

>Gcn5\_NAT\_SF

At-Nat-sf\_264-318 SVMVLRGNL-VVGGITYRPHYSQKFGIEAFCAITADEQVKGYGTRLMNHLKQHARD---
Os-Nat-sf\_211-263 ---VIRNNI-VVGGITYRPHYSQKFGIEAFCAITADEQVKGYGTRLMNHLKQHARD--
Sc-Nat-sf\_148-202 -MAVIRKPLTVVGGITYRPFDKREFAEIVFCAISSTEQVRGCGAHLNHLKDYVRN---
Hs-Nat-sf\_546-602 -LALIKDGR-VIGGICFRMFPSQGFTEIVFCVTSNEQVKGYGTHLMNHLKEYHIKHI
Clustal Consensus :: : \* : \* \* : \* : \* : \* : \* : \* : \* : \* : \* : \* : \* : \* : \* : \*

>Taf5\_NTD2

At\_Taf5\_NTD2-64-195 EDDPTRYREGYSKLRSWAYNSLDLYKHELLRVMPVFIHCYMDLVGKGHTQEARAFFNSFRKDHVMHLRLDQKLEGLVSPSHLEEMEFARSLRKSQVNIKFCQYSEYELLQYLHSTVST---LMLGINEHINFOVY-
Os\_Taf5\_NTD2-50-182 ---PARYDGYSKLRTWAYSSLDQYKHELLRVLPVFIHSDMLVAEGHTQEARAFFNFHEDHELMHSRDLQKLEGLVSPSHLEEMELARSLRKNQFRKLCQYSEYELLQYLQKQAL---VVLGINERTTFDVSP
HS\_Taf5\_NTD2\_211-343 ---PTMYEYYSGLKHFIECSLDCHRAELSQLFYPLFVHMYLELVNQHENEAKSFFKFKHGQECYVQDDLRLVLSLTKKHEMKGNETMLDFRTSKFVLRISRDSYQLLKRHLQEKQNN---QIWNIVQEHLVYIDIFD
Sc\_Taf5\_NTD2\_149-283 ---PENYIRAYSMLKNVWSSLEIYKPELSIYMYPIFYFLNLVAK-NPVYARRFFDRFSPDFKDFHGSEINRLFSVNSIDHIKENEVASAFQSHKYRITMSKTTLNLLLYFLNENESIGGSLIISVINQHLDPNIVE
Clustal Consensus \* \* \* \* \* : \* : \* : \* : \* : \* : \* : \* : \* : \* : \* : \* : \* : \* : \* : \* : \* : \* : \* : \* : \* : \* : \* : \* : \* : \*

>Taf5\_WD40

At\_TAF5-WD40-414-663 -----LLGHSGPVYSATFSPPGDFVLSS
Os\_TAF5-WD40-402-639 -----FQGHSGPVYSAAFSPFGDFLLSS
Sc\_TAF5-WD40-458-722 CMYTFQNTNKDMSCLDFSDDCRIAAGGFQDSYIKIWSLDGSSLNPNIA--LNNNDKDED-----PTCKTLVGHSGTVYSTSFSPDNKYLLSG
Hs\_TAF5-WD40-472-739 -----GLTAVDVTDDSSLIAGGFADSTVRVWVTPPKLRSVKQASDLSLDKESDDVLERIMDEKTASELKILYGHSGPVYGASFSFDRNYLLSS
Clustal Consensus : \*\*\*\*.\*\*\*.:\*\*\* .:\*\*\*.

At\_TAF5-WD40-414-663 SADTTIRLWSTKLNANLVCKGHNYPVWDAQFSPFGHYFASCSHVRTARLWSDMRIOPLRIMAGHLSDVDCVQVHPNCNYIATGSSDKTVRLWVDTGEC
Os\_TAF5-WD40-402-639 SSDSTIRLWSTKLNANLVCKGHNYPVWVQFSPVGHYFASASHDRARLWSDMKIQPLRIMAGHLSDVDCVQVHPNCNYIATGSSDKTVRLWVDTGEC
Sc\_TAF5-WD40-458-722 SEDKTIVRLWSDMTHALVSYKGNHNPVWVVSFSLGHYFATASHDQTARLWSDHIYPLRIFAGHLNVDVDCVSHFPNGCYVFTGSSDKTCRMWDVSTGDS
Hs\_TAF5-WD40-472-739 SEDGTVRLWSQLQFTCLVGYKGHNYPVWDTQFSPYGYFVSGGHDVRLWATDHYQPLRIFAGHLADVNCDFRHPNSNYVATGSADRTVRLWVDTGNC
Clustal Consensus \* \* \* : \* \* : \* \* : \* \* : \* \* : \* : \* : \* : \* : \* : \* : \* : \* : \* : \* : \* : \* : \* : \* : \* : \*

At\_TAF5-WD40-414-663 VRIFIGHRSMLVLSLAMPDGRYMASGDEDEGTIMMWDLSTARCITPLMGNH-NSCVWSLSYSGEGLSLLASGSADCTVKLWDVTSSTKLTKAEEKNGNSNRRLR
Os\_TAF5-WD40-402-639 IRMPFIGHRSMLVLSLAMPDGRYMASGDEDEGTIMMWDLSSGRCVSPGLGGH-SSCVWSLAYSCEGALLASGSADCTVKLWDVTSSTKLTKAEEKNGNSNRRLR
Sc\_TAF5-WD40-458-722 VRLFGLHTAPVLSIAVCPDGRWLTSGSEDEGIINVDIGTGKRLKMRHGKNAIYLSYSKEGNVLSGGADHTVVRVWD-----
Hs\_TAF5-WD40-472-739 VRIFTHGKPIHSLTFSPNGRFLATGATDGRVLLWDHGHLMVGEKLGH-TDVTCSLRFSPRDEIGLILASGSMNDNTVRLWD-----
Clustal Consensus :\*: \* \* . : \* : . \* : \* : \* : \* : \* : \* : \* : \* : \* : \* : \* : \* : \* : \* : \* : \* : \* : \* : \*

At\_TAF5-WD40-414-663 SLRTPPTKSTPVHALRFSRRNLLFAAGA
Os\_TAF5-WD40-402-639 MLKTLRTKSTPVYTLRFSRRNLLFAAGA
Sc\_TAF5-WD40-458-722 -----
Hs\_TAF5-WD40-472-739 -----
Clustal Consensus -----

>Taf6

At\_TAF6\_5-340 PKETVEVIAQSIGITNLLPEAALMLAPDVEYRVREIMQEAIKCMRHSKRRTTLTASDVDDGALNLRNVEPIYGFASGG---PFRFRKAI--GHRDLFYTD
Os\_TAF6\_5-342 PKETIEVIGQSVGIANLPAADVSAALAPDVEYRLREIMQEAIKCMRHAKRTVLTADDVDSALSLRNVEPVYGFASGD---PLRFKRAV--GHKDLFYIDD
At\_TAF6b-3-327 TKESIIEVIAQSIGLSTLSPDVSAALAPDVEYRVREVMQEAIKCMRHARRTTLMAHDVDSALHFRNLEPTSGSKS-----MRFKRAP--ENRDLYFFDD
Sc\_TAF6\_13-405 PQDITVVDVAESLGLNINDVDLALAMDVYRILEIIEQAVKFKRHSKRDLVLTDDVSKALRVLNVEPLYGYDGSSEVNKAVSFQVNTSGGQSVYYLDE
Hs\_TAF6\_13-387 PSESMKVVAESMGIAIQIIEETCQLLTDVEVSYRIKELAQDALKFMHMGKRQKLTSDIDYALKLKNVEPLYGFHAQE---FIPFRFAS-GGGRLELYFEE
Clustal Consensus . . : : \* : \* : \* : \* : \* : \* : \* : \* : \* : \* : \* : \* : \* : \* : \* : \* : \* : \* : \* : \* : \* : \*

At\_TAF6\_5-340 REVDFKDVIEAPLPKAPLDTIIVCHWLAIEGVQPAIPENAPLEVRAPA-----ETKIHEQ-----KDGPLIDVR
Os\_TAF6\_5-342 REVDFKIEIEAPLPKAPLDTAVVAHWLAIEGVQPAIPENPPVDAIVAPT-----ENKRETEHGK-----DDGLPVDIK
At\_TAF6b-3-327 KDVLEKLVIEAPLPNAPPDASVFLHWLAIDGIPQSPQNSPLQAIISDLK-----RSEYKDD-----G
Sc\_TAF6\_13-405 EEVDFDRLINEPLPQVPRLPFTFTTHWLAIEGVQPAIIPQNPNDIRVSQPPFIRGAIVTALNDNSLQTPVTSTTASASVTDTGASQHLNSVVKPGQNTQEVK
Hs\_TAF6\_13-387 KEVDLSDIINTPLPRVPLDVLKKAHWLSIEGQPAIPENPPAPKEQQKAEATEPLKSAKPGQEDDGPLKGGQGAATTADGKGEKAPPLLEGAPLRK
Clustal Consensus . : \* : \* : \* : \* : \* : \* : \* : \* : \* : \* : \* : \* : \* : \* : \* : \* : \* : \* : \* : \* : \*

At\_TAF6\_5-340 LPVKHVLRSREQLYFQKIAELAMSKSNP----PLYKEALVSLASDGLHPLVYPFTNFIADEVSNQ--LNDFRLLFNLHMHVRSLLQNPHEIIEPYLHQ
Os\_TAF6\_5-342 LPVKHVLRSREQLMYFDKIAELTMSRSET----SVFREALVSLSRDSSLHPLVYPFYSYFIADEVTRS--LGDLPVLFALMRVVQSLHNPHEIIEPYLHQ
At\_TAF6b-3-327 LAARQVLKSKDQIYFDKVFTEWALVQSGS----TLFRQALASLEIDPGLHPLVPFFTSFIAEEIVKN--MDNYPILLALMRLARSLHNPHEIIEPYLHQ
Sc\_TAF6\_13-405 PLVKHVLRSREQLYFQKIAELAMSKSNP----PLYKEALVSLASDGLHPLVYPFTNFIADEVSNQ--LNDFRLLFNLHMHVRSLLQNPHEIIEPYLHQ
Hs\_TAF6\_13-387 PRSIEHLSVEQLLYKIEIEACVGSCEA-----KRAEALQSIATDPGLYQMLPRFSTFISEGVRVNVVQNNLALLIYLMRMVKALMDNPTLYLEKYVHE
Clustal Consensus : \* \* : \* : \* : \* : \* : \* : \* : \* : \* : \* : \* : \* : \* : \* : \* : \* : \* : \* : \* : \*

At\_TAF6\_5-340 LMP5VVTCLVSRKLGFRFADN-----HWELRDFANLVSLICKRYGTYYITLQSRRLRTRTLVNALLDPKKALTQHYGAIQGLAALGHTVV  
Os\_TAF6\_5-342 LMP5IITCMVAKRLGHRSDN-----HWELRDFSANLVGVCRRFGHAYHNIQTRVTRTLVQGFDPQKSLTQHYGAIQGISALGSPSAI  
At\_TAF6b-3-327 LMP5IITCLIAKRLGRRSDN-----HWDLRNFFASTVASTCKRFHVYHNLPRVTRSLHTFLDPTKALPQHYGAIQGMVALGLNMV  
Sc\_TAF6\_13-405 LMP5ILTLALLAKKLGSPKDDSPQEIHEFLEERTNALRDFAAASLLDYVLKFKFPQAYKSLKPRVTRLLKTFLDINRVFGTYYGCLKGVSVLEGESI  
Hs\_TAF6\_13-387 LIPAVMT CIVSRQLCLRPVDN-----HWALRDFARLVAQICKHFSTTTNNIQSRITKFTKSWVDEKTPWTRYGSIAGLAEELGHDVI  
Clustal Consensus \*: : : \* : : : \* : : : \* : : : \* : : : \* : : : \* : : : \* : : : \* : : : \* : : : \* : : : \* : : : \*

>TAF9

At\_TAF9\_10-126 PRDAKIVKSLKSMGVED--YEPVRIHQFLELWYRYVVEVLTDQVYSEHASKPN---IDCDDVKLAIQSKVNFSSQPPPRE-----VLELAASRNKIPLPKSIAGPG-VPLPPEQDITLLSPNYQL  
Os\_TAF9\_34-179 PRDARVRELLRSMGLSEGEYEPVHVQFLDLAYRYVGDVLDGQVYADHAGKPQ---LDADDVRLAIQSKVNFSSQPPPRECEFFHSDQDFRSRSLPSDNPLFFSMVLEVARNRNKIPLPKSIAPPGISIPLPPEQDITLLSQNYQL  
Os\_TAF9b\_27-145 PRDLRVVREILHSLGLREGDYEEAAVHKLLEFAHRYAGDVLGEAKAYAGHAGRES---LQADDVRLAIQARG-MSSAAPPSRE-----EMLDIAHKCNEIPIPKPCVPSGISISLPHYEDMLLNKKHIF  
Hs\_TAF9\_13-129 PKDAQMMAQILKDMGITE--YEPVRIHQFLELWYRYVVEVLTDQVYSEHASKPN---IDCDDVKLAIQSKVNFSSQPPPRE-----VLELAASRNKIPLPKSIAGPG-VPLPPEQDITLLSPNYQL  
Sc\_TAF9\_30-151 PRDVRLHLLLASQSIHQ--YEDQVPLQLMDFAHRYTQGVLDKALVYNDYAGSGNSAGSGLGVEDIRLATAARTQYQKPTAPKE-----LMLQLAABERNKKALPQVMGTWG-VRLPPEKYCLTAKEWDL  
Clustal Consensus \*: : : \* : : : \* : : : \* : : : \* : : : \* : : : \* : : : \* : : : \* : : : \* : : : \* : : : \* : : : \*

>TAF10

At\_Taf10\_16-119 -----KHEDDAALTEFLASLMDYTPITPDDLVHEHYLAKSGFQCPDVRILRLVAVATQKRVADVASDALQHCARPAVVKDKK--QQKDK-----RLVLTMEDLSKALREYGVNVKHPEYF  
Os\_Taf10\_45-150 -----AVLTEFLSSLMYDTPITPDELVEHYLGRSGFYCPDLRLRLVAVATQKRVADVASDALQHCARPAVVKDKK--QQKDK-----RLVLTMEDLSKALREYGVNVKHPEYF  
Hs\_Taf10\_115-217 GDVKPVVSSTPLVDFLMQLEDYTPITPDAVTGYLNRAGFEASDPRIIRLISLAAQKRVADVASDALQHCARPAVVKDKK--QQKDK-----RLVLTMEDLSKALREYGVNVKHPEYF  
Sc\_Taf10\_72-205 -----KLEEEILEMMDSTPPIIPDAVIDYLLKNGFNVDVVRVRLALALATQKRVADVASDALQHCARPAVVKDKK--QQKDK-----RLVLTMEDLSKALREYGVNVKHPEYF  
Clustal Consensus \* : : \* : : \* : : \* : : \* : : \* : : \* : : \* : : \* : : \* : : \* : : \* : : \* : : \* : : \* : : \* : : \* : : \* : : \* : : \* : : \* : : \* : : \* : : \* : : \* : : \*

>TAF12

Hs\_Taf12\_57-128 -----VLTKKLQDLVREVDPEQ----LDEDVEEMLLQIADDFIESVVTAAQCQLARHRKSSSTLEVKDVQLHLERQWNMWI  
Sc\_Taf12\_414-490 -----LPPYEMDTQRVMSKRRKLELVKTVGIDEGDGETVIDGDVEELLLDLADDVFTNVTAFSCRLAKHRKSDNLEARDIQLHLERNWNIRI  
At\_taf12b\_527\_598 -----TEATNQLLGKRIQDLVSVQVDVHAK----LDPDVEDLLELVADDFIDSVTAFCSLAKHRKSSVLEPKDILLHLEKNLHLTI  
Os\_taf12b\_400-471 -----LGKRIQDLVSVQVDVHAK----LDPDVEDLLELVADDFIDSVTAFCSLAKHRKSSVLEPKDILLHLEKNLHLTI  
At\_Taf12\_399-469 PGNHAKTVSAETEPSDDRILGKRSIHELQQIDPSEK----LDEVEDILSDIAEDFVESITTFGCSLAKHRKSDILEAKDIL-----  
Os\_Taf12\_169-240 -----LLSKRSIHLELVAQIDPSEK----LDEVEDILSDIAEDFVESITTFGCSLAKHRKSDILEAKDIL-----  
Clustal Consensus : \* : : \* : : \* : : \* : : \* : : \* : : \* : : \* : : \* : : \* : : \* : : \* : : \* : : \* : : \* : : \* : : \* : : \* : : \* : : \* : : \* : : \*

>TRA-FAT

AtTRA1b\_FAT\_2776-3116 YEILLDSLWKAPDWTYK--DHVIPKAQVEETPKLRLVQACFSLHEKNANGVGDEN--IVGKGVLDLAEQWQLPEMSLHARVPLLQQFQQLVVEVQES  
AtTRA1a\_FAT\_2785-3125 YEILLDSLWKLPDWAYLK--DHVIPKAQVEETPKLRLVQACFSLHEKNANGVGDEN--IVGKGVLDLAEQWQLPEMSLHARVPLLQQFQQLVVEVQES  
Os\_FAT\_1-98 -----DILLECGWRVADWNSDRDALEQSVKSVMDVPTPRRQMFKTFLLALQNFPAESRKGQDQEVKRLCDEGIQLSLIKWVSLPIRYTPAHKWLLHGFQQYMEFLEA  
Sc\_FAT\_2757-3106 --LVLECAWRVSNWTAMKEALVQVEVSPKEMAWKNMRYGYLAICHPEEQQLSFIER--LVEMASSLAIREWRRLPHVVSHVHTPLLQAAQQIIEIQEA  
Hs\_FAT\_2833-3175  
Clustal Consensus

AtTRA1b\_FAT\_2776-3116 SRIYVDIANGSKVPNGAAVGGQGNLYADLKDILETWRLRTPNEWDNMTVWYDMLQWRNEMYNVVIDAFKDFVTSNTPLH-----HLGYRDKAWNVN  
AtTRA1a\_FAT\_2785-3125 ARIHVDIANGNKVSGNTAVGGLGNRYADLKDILETWRLRTPNEWDNMTVWYDMLQWRNEMYNVVIDAFKDFATSNSPLH-----HLGFRDKAWNVN  
Os\_FAT\_1-98 -----TQIYANLHT-----TTVQNLDLSKAQEKIRLQAWRDRLPNTWDDVNMWDLVTVWRQHFQVQVNNAYLPLIPALQQSNSNSNINTHAYRGYHEIAWVIN  
Sc\_FAT\_2757-3106 AQINAGLQP-----TNLGRNNSLHMKTVVKTWRNRLPIVSDLSHSSIFMWRQHHPQAIIVTAYENSSQHPSSN-----NAMLGVHASASAI  
Hs\_FAT\_2833-3175  
Clustal Consensus

AtTRA1b\_FAT\_2776-3116 KLARIARKQGLYDVCVQILEKMYGHSQMEVQEAFFVKIKQAKAHLETK----GELATGLNLVNSTNLEFFLAKNKAEIFRLKGFHLKLNDEGANLAY  
AtTRA1a\_FAT\_2785-3125 KLARIARKQGLYDVCVQILEKMYGHSQMEVQEAFFVKIKQAKAHLETK----GERASGLNLINSTNLEFFPDKIKAEIFRLKGFHLKLNDESANIAY  
Os\_FAT\_1-98 -----INNTNLEFFPVKNKAEIFRLKGFHLKLNDESANIAY  
Sc\_FAT\_2757-3106 RFAHVARKHNMPDVCISQLARIYTLPNIEIQEAFKLREQAKCHYQNM----NELTTGLDVISNTNLVYFQVQKAEFFTLKGMFLSKLRAYEENQAF  
Hs\_FAT\_2833-3175 QYQKIARKQGLVNVVALDILSRIHTIPTVPIVDCFQKIRQVVKCYLQLAGVMGKNECQGLLEVIESTNLKYFTKEMTAEFYALKGMFLAQINKSBEANKAF  
Clustal Consensus : . \* \* \* \* : : : \* : : \* : : \* : : \* : : \* : : \* : : \* : : \* : : \* : : \* : : \* : : \* : : \* : : \* : : \* : : \* : : \* : : \* : : \*

AtTRA1b\_FAT\_2776-3116 SNAITLTKNLPKGWISWGNYCDMAYQDTQDEIWLEY-AVSCFLQGIRFG-VSNSRSHMARVL-  
AtTRA1a\_FAT\_2785-3125 SNAITLTKNLPKGWISWGSYCDMAYQETQEEIWLEY-AVSCFLQGIRFG-VSNSRSHIARVL-  
Os\_FAT\_1-98 SNAITLTKNLPKAWISWGNYCDMVFKEITKDEIWLEY-AVSCFFQGIKYG-VSNSRSHLARIL-  
Sc\_FAT\_2757-3106 ATAVQIDLNLAKAWAQWGFNRRLESEPNNSIFASNAISCYLQAAAGLYKNSKIRELLCRILW  
Hs\_FAT\_2833-3175 SAAVQMHDLVVKAWAMWGDYLENIFVKER-QLHLGVSAITCYLHACRHNQESKSRKYLAKVLW  
Clustal Consensus : \* : : \* : : \* : : \* : : \* : : \* : : \* : : \* : : \* : : \* : : \* : : \* : : \* : : \* : : \* : : \* : : \* : : \* : : \* : : \* : : \* : : \*

>TRA-FATc

At-Trala-Fatc-3827-3858 -PQSVQRGVNELVEAALSPPNLCMMDPTWHPWF  
At-Tralb-Fatc-3803-3834 -PQSVQRGVSELVEAALSPPNLCMMDPTWHPWF  
Os-Tral-Fatc-811-842 -PQSVQRGVTDLVEAALSPPNLCMMDPTWHPWF  
Hs-TRRAP-Fatc-3803-3830 -----ESKVNITLVAANSLDNLCRMDPAWHFWL  
Sc-Tral-Fatc-3712-3744 TPTVTTFQFILDICIGSAVSPRNLCRMDPAWHFWL  
Clustal Consensus : : \* \* \* \* : : : \* : : \* : : \* : : \* : : \* : : \* : : \* : : \* : : \* : : \* : : \* : : \* : : \* : : \* : : \*

>TRA-TRRAP

AtTRA1b\_TRRAP-3458-3746 LDRVGADIQIVRRHGSSCRRLTLIGSDGSKHFIVQTSITPN-ARSDERILQLFRVMNQMFDKHESRRRHGLGHTPIIIPVWSQVRMVEDDLMYNTFLE  
AtTRA1a\_TRRAP-3482-3770 LDRVGADVPIVRRHGSSFRRLTLIGSDGSKHFIVQTSITPN-ARSDERILQLFRVMNQMFDKHESRRRHGIHTPIIIPVWSQVRMVEDDLMYNTFLE

OsTRAl\_TRRAP-467-756 LDRVGPDIPIVRRHGSSFRRLTLIGSDGSRHFIVQTSLTPN-ARSDERMLQLFRVLNKMFDKHKESRQRHLAIHTPIIIPVWSQVRMVEDDLMYSTFLE  
Sc\_TRRAP\_3371-3676 IARFLPTVDVFRGTHSSYRRLMIRGHGDSVHSFAVQYPAVRH-SRREERMPQLYRLFNKSLSKNVETRRRSIQFNLPPIAIPSPQVRIMNDSVSTTLHE  
Hs\_TRRAP\_3467-3754 IARFMPRVEIVQKHNTAARRLYIRGHNGKIYPYLVMDACLTESSRREERVLQLLRLNLPCKLEKRKETTKRHLEFFTVPVAVSPQMRLVEDNPSSLSLVE  
Clustal Consensus : \* . . . :\*: : : \* : \* : \* . : \* : \* : \* : \* : \* : \* : \* : \* : \* : \* : \* : \* : \* : \* : \* : \* : \* : \* : \*

AtTRAlb\_TRRAP-3458-3746 VYENHCGRNGRESDLPIITYFKEKLNQAITGQISPEAIGDLRLQAYGEITKNIVNDTIFSQYMYKTSMSGSHLWAFKKQFAVQLAVSNFMSFLLQIGGRSP  
AtTRAla\_TRRAP-3482-3770 VYENHCARNRDREADLPITHFKEQLNQAISGQISAEAIGDLRLQAYIDITKTLVNDTIFSQYMYKTLMSGSHMWFKKQFAVQLAVSSFMSFLLQIGGRSP  
OsTRAl\_TRRAP-467-756 VYEINCARINREADSPITIFKEQLNQAISGQVSPAEVVELRLQAYNEITKNIVNDNIFSQYMHKILPTGNHLWTFKKQFAIQVALSCFMSYMLQIGGRAP  
Sc\_TRRAP\_3371-3676 IHNEFCCKKGFDDPDIQDFMADKLNAAHDDALPAPDMTILKVEIFNSIQTMFVPSNVLKHDFTSLFTQFEDFWLFRKQFASQYSSFFVMSYMMINNRTP  
Hs\_TRRAP\_3467-3754 IYKQRCACKGIEHDNPIISRYVRLATVQARGTQASHQVLR--DILKEVQSNMVRSMLEKALHTFPNATDVTFRKMFITQLALIGFAEFVLHLNRLNP  
Clustal Consensus ::: \* :. : \* : : \* . : : : \* : : : \* : : : \* : : : \* : : : \* : : : \* : : : \* : : : \* : : : \* : : : \* : : : \*

AtTRAlb\_TRRAP-3458-3746 NKILFAKNSGKMFQTDHPSYDSNG-----MIELNEPVFRLTRNMHAFLSHFVGEGLMSNMCSASQAVFSKQNEHLRYQLAMFF  
AtTRAla\_TRRAP-3482-3770 NKVLFKNTGKMFQTDHFPAYDANG-----MIEFNEPVFRLTRNMQAFFSQFVGEGLMSSMCSAAQAVISSKQNEHLRYQLAMFF  
OsTRAl\_TRRAP-467-756 NKILFAKNTGKIFQNDHFPAYDPNG-----MIEFNEPVFRLTRNMQAFFSNFVGEGLIVSAMCSAAQSVVSPKQSQHLWHHLAMFF  
Sc\_TRRAP\_3371-3676 HKIIVDKTSGNVFTLEMLPSRFPYERVKPLLNKNDLSLPPDSPIFHNNEPVFRLTPNIQSLIGDSALEGIFAVNLFTISRALIEP--DNELNITYLALFI  
Hs\_TRRAP\_3467-3754 EMLQAQDTGKLNVAIFRFDINDATG-----DLLANRPVFPRLTPNISSEFLTTIGVSGPLTASMIAVARCFAP--NFKVDGILKTVL  
Clustal Consensus . : . : :\*: : : : : \* . : : : \* : : : \* : : : \* : : : \* : : : \* : : : \* : : : \* : : : \* : : : \*

AtTRAlb\_TRRAP-3458-3746 RDELLSWF-  
AtTRAla\_TRRAP-3482-3770 RDELLSWF-  
OsTRAla\_TRRAP-467-756 RDELLSWF  
Sc\_TRRAP\_3371-3676 RDEIISWF  
Hs\_TRRAP\_3467-3754 RDEIIAWHK  
Clustal Consensus \*\*\*\*:\*

>SGF29

At\_sgf29a\_131-266 ASLKGQVAARVTAESADKDEWVVKVIHFDRETKEVEVLDEEPPDDEEGSGQRTYKLPMLCILPFPKRNDPSTQEFPPGHVLAIVYPTTALYKATVVSTPRKRKSDDEYLLEFDDDEEDGALPQRTVPPHVVVALPE----  
At\_sgf29b\_134-269 --LKGEQVAARVTAEDAEDKDEWVVKVIHFDRETKEVEVLDEEPPDDEEGGGQRTYKLSMSCILPFPKRNDPSTQEFIPGHVLAIVYPTTALYKATVISTPRKRKSDDEYLLEFDDDEEDGALPQRTVPPHVVVALPEGHRQ  
Os\_sgf29\_199-332 --LKGEQVAARVTKSD-EEKDEWVVKVIHFDRETKEVEVLDEEPPDDEE-SAQKKYKLPMSDIIIPFPKRNDPSSAPDFGQGRVLAIVYPTTALYRATVASN-RKRKSDDYLLLFDDEEDGNLPQRAVPPYRVVPLPE----  
Hs\_sgf29\_158-289 ---PGDKVAARVKAVDGDEQ-WLLAEVVSYSYHATNAYEVDDIDEEGKERHTLSRRRVIPLPQWKANP---ETDPEALFQKEQLVLAIVYPTTALYRATVASN-RKRKSDDYLLLFDDEEDGNLPQRAVPPYRVVPLPE----  
Sc\_Sgf29\_126-250 --LVGSEVAYKPRRG-SADGEWIQCEVLKVVADGTRFEVRDEPEP--DELGNSGKVYKCNRKELLIIP--PGFPTKNYPPGKAVLARYPETTTFFPAIVIGT--KRDGTCRLRFDGEE--VDKETEVTRRLVLPSP----  
Clustal Consensus \*: \*\*: : . \*: :\*: : . \* : : \* : : \* \* \* \* \* : \* \* : . :. \* \* . \* . \* : \*

>UBP8

AT\_UBP22\_177-528 ----TFPLGLRGLNNGSTCFMNAVLQALVHAPPLRNFVLSGQHNRLCPRRT-MG-----LLCLPCDLVDVIFSAMFSGDRTPYSP-----AHLLYSWQHSTNLATYEQQDSHEFFISLLDRIHE--NEGKSKCLYQ---DNEECQCITHKAFSGLLRSVDVCTTCGSTS-TTYDPFIDISLTLDS--  
OS\_UBP22\_211-576 SASAAAAPAGLRGLNNGSTCFMNSVLQALLHAPPLRNFVLSGQHNRLCPRRTPMRRAEANDKAAACLACDLDEIYSAAFSGERTPYSP-----AKFLYSWQHASNLAHYEQQDAHEFFISILDHIHENIKDDQHKSLAQ---GHGDC-CIAHRVFSGLRSVDVCTTCGSTS-TTFEPCMDISLTLDS--  
HS\_USP22\_176-518 -----RGLINLNGSTCFMNCIVQALHTPLLRDFFLSDRHR--CEMQSPSS-----CLVCEMSLLFQEFYSGHRSPHIP-----YKLLHLVWTHARHLAGYEQQDAHEFLIAALDVLHRCRGGDNGKKN---NPNHCNCIIDQIFTGGLQSDVTCCQVCHGVS-TTIDPFWDISLTLDS--  
SC\_UBP8p\_138-466 -----GLINMGSTCFMNSILQLCIHNPYFIRHMSQIHSNN-CKVRSDDK-----CFSCALDKIVHLYGALNTRKQASSSSTSTNRQTGFYLLTCAWIKINQLAGYSQQDAHEFWQFIINQIHQSIVLDPNAKEVSRANKQCECIVHTVFEGLSLESSIVCPGCQNSKTTIDPFWDISLTLDS--  
Clustal Consensus \*\* \* : \* . \* : \* : \* : \* : \* : \* : \* : \* : \* : \* : \* : \* : \* : \* : \* : \* : \* : \* : \* : \* : \* : \* : \* : \* : \* : \* : \* : \* : \* : \* : \* : \* : \* : \* : \* : \* : \* : \*

AT\_UBP22\_177-528 MNGFSPADCRNRNRYSGGGS--VNAIMPVLSGCLDFFTRSEKLPDQKLNCSGEGRESSKQMSIRRLPPLLCLHVRFEHSLTRKTSRKRIDSLYQYFRLNMSPYLSSSIIGKRFGRNRIFAFDGEGEYDSSSSSSPSAEFEIFAVVTHKGMLES GHYVTYLR-LKGLWYRCDDAWINEVEEEVVRGCECYMLFY-  
OS\_UBP22\_211-576 NNSLGVANPKVHVRNGERSGGTNTKVSITLMLERFTRAERLDAEQFFCERCKERQESLQMSIRRLPLVSCFHIKRFHESSVKMSRVDHCLQFPFLDMAPYLSSSILRSRFGNRIFFPSEAS---DADSVSEFSSEFEIFAVIMHSGLEAGHYVTYLR-LNNHWYKCDDAWVTRVEEHTVRTSQAYMLFYV  
HS\_USP22\_176-518 TPFWPLSPGSEGNVNGES--HVSCTTTLTDCLRFRTRPEHLGSSAKIKCSGCHSYQESTKQLTMKKLPVACFHLRFEHS--AKLRRKITTVSVFPELEDMTPFMASSKESRMNGQYQP-----TDSLNN-DNKYSLFAVNVHQTLES GHYTSFIRQHKDQWFKCDDAIIKASIKDVLDSGAYLLFYH  
SC\_UBP8p\_138-466 -----KKKLYECLDSFHKEQLK--DFNVHCGECNSTQDAIKQLGIHKLPSVLVQLRFEHLLNGSNR-KLDDPIEFPTYLNKMYCSTKEDKHSENGKVP-----DIIYELIGIVSHKGTVNEGHYIAFCCKISGGQWFKFNDSMVSSISQEEVLKEQAYLLFYT  
Clustal Consensus . \* \* \* : \* : \* . : \* \* . : : \* : : \* : : \* : : \* : : \* : : \* : : \* : : \* : : \* : : \* : : \* : : \* : : \* : : \* : : \* : : \* : : \* : : \* : : \* : : \* : : \* : : \* : : \* : : \* : : \* : : \* : : \*

>SGF11

At\_Sgf11-89-121 ASEVFNCMNCRQIVAGRFPAPHELEKCMGKGRKA  
Os\_Sgf11-93-125 AADLVDCMNCGRPVAAGRFPAPHELEKCMGKGRKA  
Hs\_Sgf11-80-112 KSKCEVCPNCSRSIAASRFAPHELEKCLGMGRNS  
Sc\_Sgf11-67-99 SSQYIHCECGRDVSANRLAAHLQRCLSRGARR  
Clustal Consensus :. \* \*\* : \* : \* : \* : \* : \*

>ENY2

At\_eny2\_26-110 EKDKVTLREIINVKLVESGEKENLMELVRDRLVECGWDEMRACREHVKKKGRKDVTVDELIRVITPKGRASVPDSVKAELLNRIQNFII-  
Os\_eny2\_22-107 ----SLREIINVKLVESGEKENLMELLRERLVECGWRDEMKALCRAYARKKGRNNVTVDLHIVITPKGRASVPDSVKAELLQRIQSFLM  
Hs\_eny2\_11-95 ----QMRRAINQKLIETGERERLKEKLLRAKLIIECGWQDLKAHCKEVIKKEGLEHVTVDLVAEITPKGRALVPDSVKKELLQRIQRTFL-  
Sc\_eny2\_7-90 ----QMRRAINQKLIETGERERLKEKLLRAKLIIECGWQDLKAHCKEVIKKEGLEHVTVDLVAEITPKGRALVPDSVKKELLQRIQRTFL-  
Clustal Consensus : \* \* \* \* : \* : \* : \* : \* : \* : \* : \* : \* : \* : \* : \* : \* : \* : \* : \* : \* : \* : \* : \* : \* : \* : \* : \* : \* : \* : \* : \* : \* : \* : \* : \* : \* : \* : \* : \* : \* : \* : \*

>CHD1\_chromo

At\_chromo\_535-588 QNSQVERIIADRI-SKDGLGD-----VVPYLVKWKQGLSYAEATWEKDVD-IAFAQ-VAIDYKAR  
Os\_chromo\_507-560 ---VVERIFADRV-SKVDGDD-----LVPEYLVKWKQGLPYAESTWEKDTD-IEFAQ-DAIDYKAR  
Sc\_chromo\_286-341 ---VPERIIDSQR-ASLEDGT-----SQLQYLVKWRRLNLYDEATWENATDIVKLAP-EQVKHFQNR  
Hs\_chromo\_378-447 --QIVERVIAVKT-SKSTLGQTDPAHSRKPAPSNPEYLVCKWMLPYSECSWEDEALIGKKFQ-NCIDSFHSR  
Hs\_chromo\_300-325 -----KDEGE-----IQYLKWKQWSYIHSWESSE-----  
At-chromo\_460-499 -----NEMEFLIKWKQSHLHCQWKTLSDLQNLSGFKKVLNMYTKK  
Os\_chromo\_433-471 -----DVEFYIKWKQSFHLCQWKTLSSELQNVSGFKKVLNMYMKR  
Sc\_chromo\_176-247 -FHGIDIVINRKLKTSLEEGKVLKKTVPDLNCKENYEFLIKWTDESHLHNTWETYESIGQVRGLKRLDNYCK-  
Clustal Consensus : : : \* . . \* :

>CHD1\_helic

At\_HELICc\_937-1061 SSGKLVILDLVRLRETRHRVLIFSQMVRMLDILAAYLSLRGFQFQRLDGSSTKAELRQQAMDHFNPASDDFCFLSTRAGGLGINLATADTVVIFDSDWNPQNDLQAMSRHRIGQQEVSNIY  
Os\_HELICc\_926-1034 -----ETNHRVLIFSQMVRMLDILAAYLSLRGFQFQRLDGSSTRADLRHQAAMHFNPASDDFCFLSTRAGGLGINLATADTVVIFDSDWNPQNDLQAMSRHRIGQQEVSNIY  
Hs\_HELICc\_807-913 -----GNRVLIFSQMVRMLDILAAYLTIKHYPFQRLDGSIKGEIRKQALDHFNPASDDFCFLSTRAGGLGINLATADTVVIFDSDWNPQNDLQAMSRHRIGQQEVSNIY  
Sc\_HELICc\_693-817 -SGKMVLLDQLLRLKDKDHRVLIFSQMVRMLDILAAYLSLRGFQFQRLDGSSTKAELRQQAMDHFNPASDDFCFLSTRAGGLGINLATADTVVIFDSDWNPQNDLQAMSRHRIGQQEVSNIY  
Clustal Consensus :\*\*\*\*\*::\*\*:: \*\*\*\*\*: . \*: :\*\*\*: \*\*: \*\*\*\*\* :\*\*\*:\*\*\*\*\* \*\* :\*\*\*\*\*: \* :\*

>CHD1-dexdc

Hs\_DEXDc\_503-648 ---NSVILADEMGLGKTIQTISFLSYLFHQHQLYGPFLIVVPLSTLTSWQREFEIIWAPEINVVVYIGDLMSRNTIREYEWHIS---QTKRLKFNALITTYEILLKDKTVLGSINWAFVGVDEAHRLENDSSLLYKTLIDFKSNHRLITITGTP  
Sc\_DEXDc\_396-544 ---NGILADEMGLGKTVQTVAFISWLIFARRQNGPHIIVPLSTMPAWLDTFEKWAPDLNLCIYMGNGKSRDITREYEFYTNPRAGKTKMKNVLLTYYEYLKDRAEGLSIRKWFMAVDEAHRLENAESSLYEINSFKVANRMLITGTP  
At\_DEXDc\_645-791 LNDTNVILADEMGLGKTVQSVSMLGFLQNTQQIPGPFVVPLSTLANWAKFRRKWLPGMNIIVYVGTASREVCQQYEFYNE--KKVGRPIKFNALLITTYEVVLDKKAVALSKIYIYMLVDEAHRLENSEAQLYATLLEFSTKMKLLITGTP  
Os\_DEXDc\_617-763 ---NVILADEMGLGKTIQSVSMLGFLHNAQIEINGPFLVVVPLSTLSNWAKEFRKWLPGMNIIVYVGNRASREICQQHEFFT--KKGGRHVKPFHTLITTYEVVLDKKAVALSKIYIYMLVDEAHRLENSEASLYTLLLEFSTKMKLLITGTP  
Clustal Consensus . \*\*\*\*\*::\*\*::\*\* :. \*\*:\*\*\*\*\*: \* \* \* \* \* : \* : \* \* : \*\* : :\*\*\*: . : \*\* : :\*\*\*: :\*\*\*: \*\*\*\*\* : \*\* : \* . \* : :\*\*\*\*\*

>ADA2b\_SWIRM

At\_SWIRM\_409-483 ---LDLIGFTESQLLSESEKRLCSEVKLVPPVYLQMQVMSHEIFK-GNVTKKSDAYSLEKIDPTKVDVVYDMLVKK-GI---  
Os\_SWIRM\_485-553 ---WDIVGFPGAELLSTSEKNCQQNRLPNHYLKMQEVLMOEIKK-GSVAKEDAHVLEKVDPAKVDNVYDMVTKLGTNEE  
Sc\_SWIRM\_355-428 MTLSDIQHAPDYALLSNDEQQLCIQLKILPKPYLVLEVMFRELKTKGNLSSACRELLNIDPIKANRIYDFP-----  
Hs\_SWIRM\_364-440 --PLNLTGLPGEKLNKKEKELCQMVRLVPGAYLEYSALLNECNKQGGLR-LAQARALIKIDVNRTRKIYDFLIREGYI---  
Clustal Consensus :: . \* . : : \*\* \* \* : : \* \* \* . : \* : \* \* . : \*\* \* . : \* : \*

> ADA2b\_SANT

At\_SANT\_105-147 ICPDWSADDEMLLLEGLEIYGLGNWAEVAEHVGTKSKKEQCLEHYRNI-  
Os\_SANT\_111-152 ---WNADEEILLLEGIEMYGLGNWAEVAEHVGTKTKAQCIDHYTT--  
Hs\_SANT\_74-118 ---SWTAQEEMLLEAVMDCGFGNWQDVANQMCKTKRKECEKHYMKHF  
Sc\_SANT\_65-107 ---WGADEELQLIKGAQTLGLGNWQDIADHIGSRGKEEVKHEYLKY-  
Clustal Consensus \* \* : \* : \* : \* : \* : \* : \* : \* : \* : \*

>ADA2b\_ZZ-ADA2

At\_ZZ\_ADA2\_45-93 GGGKYNCDYCRDITGKIRIKCAVC--PDFDLCIECMSVGAEITPHKCDHPYRVM  
Os\_ZZ\_ADA2\_51-99 ---YHCNYCNKDISGKIRIKKSKC--PDFDLCVECFVGAEVTPHRSNHPYRVM  
Sc\_ZZ\_ADA2\_5-53 ---FHCIVCSADCTNRVRVSCAIC--PEYDLCVPCFSGSYTGKHPYHYDYRII  
Hs\_ZZ\_ADA2\_15-64 ---PPCRGCSYLYMEPY-ICKAECGPPFFFLCLQCFTRGFYKHKHSDDHTYEIM  
Clustal Consensus \* \* . : : \* \* : \* : \* : \* : \* : \* : \*

>Spt3\_TAF13

atspt3 KTLFQKELQHMMYGFGEQN-----PLPESVALVEDIVVEYVTDLTHKAQEIGSKRGR--LLVDDFLYLIRKDLPKLNRCRELLAMQEELKQARKAFDSD  
osspt3 RGVFQKDLQHMMYGFGDDPNARNCLIGCGNCLTCCGTLEPLPETVALVEDIVVEYVTDLVHKAQNVAKRGK--LLTEDFLYLIRKDVRLHRRATELLSMNEELKQARKAFD--  
Hsspt3 ---FATELQSMYSLGDARR-----PLHETAVLVEDVVHTQLINLQQAAEVSQLRGARVITPEDLLFLMRKDKKKLRRLLKYMFRIDYKSKIVKQID--  
Scspt3 KHRYRVEIQMMFVSGEIND-----PPVETTSLEIDIVRGGVIEILLQSNKTAHLRGRSILPEVIFLIRHDKAVNRRLRTYLSWKDLRKNAKQD--  
Clustal Consensus : : \* \*\* : \* : \* \* : \* : \* : \* : \* : \* : \* : \* : \* : \*

>Spt20\_spt20

At\_spt20-62-208 -----DHEVFSFILSYPNNGYSIG-----KTSEAMQQISFRDVPKVLHPYDRAAEGLLSAIEAGRLPGDILEDIP---CKFVGVVIVEVVDY  
Os\_spt20-76-236 -----LDLEPSFALNLFPGYSISDPGKRLLSAKGMLLFLIGDDPQK-RPYSKASRALFSDIEHGCLPQVILGDMPE---CKFRNGTIVCEVRDY  
Hs\_spt20-74-226 -----LSCLVVNLYPNGEYS-----LMLRGNKSDSETIRLPYEEG--ELLEYLDAEELPPLVLDLEKSNQVNFHCGCVIAEIRDY  
Sc\_spt20-122-341 DADSILKKEQYLHSFEFHYENNYKICAPAN--SRLQQQKQPELSDGLILTKNNETLKEFLYVARGRIPDAIMEVLRDCN-IQFYEGNLLIQVYDH  
Clustal Consensus . : . : \* : : : \* : : \* : \* : \* : \*

At\_spt20-62-208 R-----KHTSSQVS-----PVINKLRLKMSLENVVKDIPSMS--DNSWTYGDLMVESRI  
Os\_spt20-76-236 R-----PFLSNAGDSSGDFFIVNRVSLRGLTERVVKDLASVV--NASWTYHQDLIAESTI  
Hs\_spt20-74-226 R-----QSSNMSPG-----YQSRHILLRPTMQTLICDVSITSDNHKWTQEDKLLLESQ  
Sc\_spt20-122-341 TMTVDVTPKENKPNLNSSSPNNSTQDNSKIQQSPENSGVANTGANTANKKASFKRPRVYRLLKPNLDLTYDDMMSYAD-NARFSDSIYQQFESEI  
Clustal Consensus . : \* : \* : \* : \* : \*

At\_spt20-62-208 LKALQPELCLDPLPRDLRS-----  
Os\_spt20-76-236 LRALQPRNLDPPTCLRQLQN-----  
Hs\_spt20-74-226 ILATAEPLCLDPSIAVCTANRLLYN  
Sc\_spt20-122-341 LTLTKRNLSSVPLNPYEHDRMLE--  
Clustal Consensus : \* \* .

>ADA3-ada3

At-ADA3-835-957 --ETLGIIDEKIYMEAQSIGICLDPMP-----ISNVEDEGIVDDIKTLEEAIQEVVSKKKDMLNRLKPALEMKERQEKFERLGEYKLIEMAY  
Os-ADA3-889-995 -----FSDRIIEELSEVGVSEVPVPD-----LAQSEDEDINSEICKLEGQLHKEVVVKKNLRLKLDGILRTKKESQHFERSRRAMERLLLIAY  
Sc-ADA3-505-649 NLDYPTFEERLKRKLKYVGYMNLKPKDENNPNSDDPDWVTGREDEISAELRELGQTLKQVTKKNQRKAQLIPLEVRQLAWQEYSILEDLKQIQAY  
Hs-ADA3-309-431 -PHTKSLSESRIKEELIAQGLLESEDRP-----AEDSEDEVLAEELRRQAELKALSAHNRKTKHDLRLAKKEEVSRELQRVVRMADNEVMDAF  
Clustal Consensus : . : : \* \* : . : : : : \* : \* . : : \*

At-ADA3-835-957 EKSK-----ASRRHHSASGK-----SSATKISKQAFAFVKRTLER  
Os-ADA3-889-995 EK-----YMAFCGS-----SSSKNVNRAKGHAAL-----

```

Sc-ADA3-505-649  VKRIRVFKRRKHHHTAASNNTGTTTQIAQQKAANSSLKSLLDK
Hs-ADA3-309-431  RKIMA---ARQKRRTPTK-----EKDQAWKTLKERESILKLLD-
Clustal Consensus  *           : . . . . :

>ADA1-TAD1

Os-ada1a-6-270  -AKKVAARVDMEIKSQIAKKLGAERSEHYFHSLLKFLGGQLGKEEFDKICVATMG-----RDNIKYHNFLIRSILSNAYLATAPPPPPPP
Os-ada1b-3-236  -TSRKLARVDIAELKQRLVKRLGRQAGQYFAHLRLLNLKLTKEFDKLCYATIG-----RENIALHNALIRGIISNALSG----VPPP
At-ada1a-3-248  -SDQCF SRLNSLEIKALTYQKIGHQRADTYFDQLGKFLTSRISKSEFDKLCSTVG-----RENISLHNRLVRSILKNASVAK----SPP
At-ada1b-3-243  TSQHVVVTRTDISELKSQIEKRIGRAKTESYLNLLSKFLSLKISKSDFDKLIIVTVK-----RENISLHNALLRGILKNICLSKT---LPPF
Hs-ada1-7-195   -----ELEAAKKNLSEALG-DNVKQYWANLKLWFKQKISKSEFDLEAHRLLT-----QDNVHSHNDFLLAILT-----R
Sc-ada1-54-317  -PQGPNQRIDLGAMIEELTSLGKESWTKYAQIISLFIKGLSRKELSNELVLFSPSAASLEKSNNTNHHHSLVRLHNQLLLGIFANSLRENPLGRNGNE
Clustal Consensus  :           : . :* * : : : : : . : : ** : : .*:

Os-ada1a-6-270  SRQATTGNSQTSTVSVSNAGAVANHGVMAGVMRGPALATREARFERPSPGLGKSPGLHGQGTGEFVSAGSKAPLEVVSVEDG----EEVNQAGGSPVYAQSR
Os-ada1b-3-236  SRQAVTG--QSGTTTAPSQCQVGIALQSARNVAVVDSGDGDFAR-----ERAVAG-----KVLVSVEDG----EEVEQVRSAP-CVQSR
At-ada1a-3-248  PRYPKSLYGDVFPFPPSPRKRKRFRDRPSPPLGPLGPKQSLTTTND-----ESMSKAQRLPMEVSVSVEDG----EEVEQMTGSP-SVQSR
At-ada1b-3-243  VKNGVESDNKKKQLNGAFQSLCKELPRSPRKRRTQRRLNK-----DGNISKGKSLVTEVVSSSGRQQWSMENVEEVDQLIPCWRSQ
Hs-ada1-7-195   CQILVSTPDGAGSLPWPGGSAAKPGKPKGKKKLSVSR-----QKFDHR-----FQPQ
Sc-ada1-54-317  SSWGFGNGSNPNKLRINKHNSQIEVYKIVMSLPLNDR-----NRLKMITKEAGKRGFIFCSVFQ----ARLNNIPKIP-IVTNP
Clustal Consensus  ..           . . * : : .*: : .. : .: : : : :

Os-ada1a-6-270  SPIRAPLGVSFDPKAQNSRPSIPHPSLICYKNGELPEAQRLLKLLLENKLQAEGLS--LTQECADVLNSGLNAYLSRLLKSCMGVAK
Os-ada1b-3-236  SPITAPLGIST-TPTYGARTWRLLDDPMVSCYDSSHLLDTSGLFKGLQRRLES DGIG--VSVQGVVNLNRGLDEF LRRLIKPCMEL--
At-ada1a-3-248  SPLTAPLGVSFHLKSKARFSTYNGINRETQSSGELPDMITLRARLEKLEMEGIK--LSMDSANLLNRGLNAYMRRLEPCLSLAS
At-ada1b-3-243  -PIEAPFGVNLRDVIKKQHR-----IDTCCYSSGELPDSVSLKKKLEDDLE-EGLE--VSVGFANSLNAGLDVFLKRLIKPCLEL--
Hs-ada1-7-195   NPLSGAQQFVAKDPD-----DDD LKCSHTMMLPTRGQLEGRMIVTAYEHGLDN-VTEEAVSAVVYAVENHLKDLLTSVVSRRK
Sc-ada1-54-317  ESLKRVKSNNLKTPLAWSQDIMNGFNVPLASESHSLPDTDSFYLRMVGIAREHGLVGTVDARCVELISLALDQYLKNIIEFTIDTVR
Clustal Consensus  ..           . . * : : .*: : .. : .: : : : :

```

**S1 Fig: Domain similarity between human, *S. cerevisiae*, *Arabidopsis* and *O. sativa* SAGA complex encoding genes.**

Sequence alignments of the representative domains of each protein of the SAGA complex were done by using Clustal X.
