# Supplementary material for: Spt-Ada-Gcn5-Acetyltransferase (SAGA) Complex in Plants: Genome Wide Identification, Evolutionary Conservation and Functional Determination
Source: PubMed Central journal article supplement (PMC4532415; doi:10.1371/journal.pone.0134709), 2015-08-11
Supplement: pone.0134709.s003.pdf [file pone.0134709.s003.pdf]

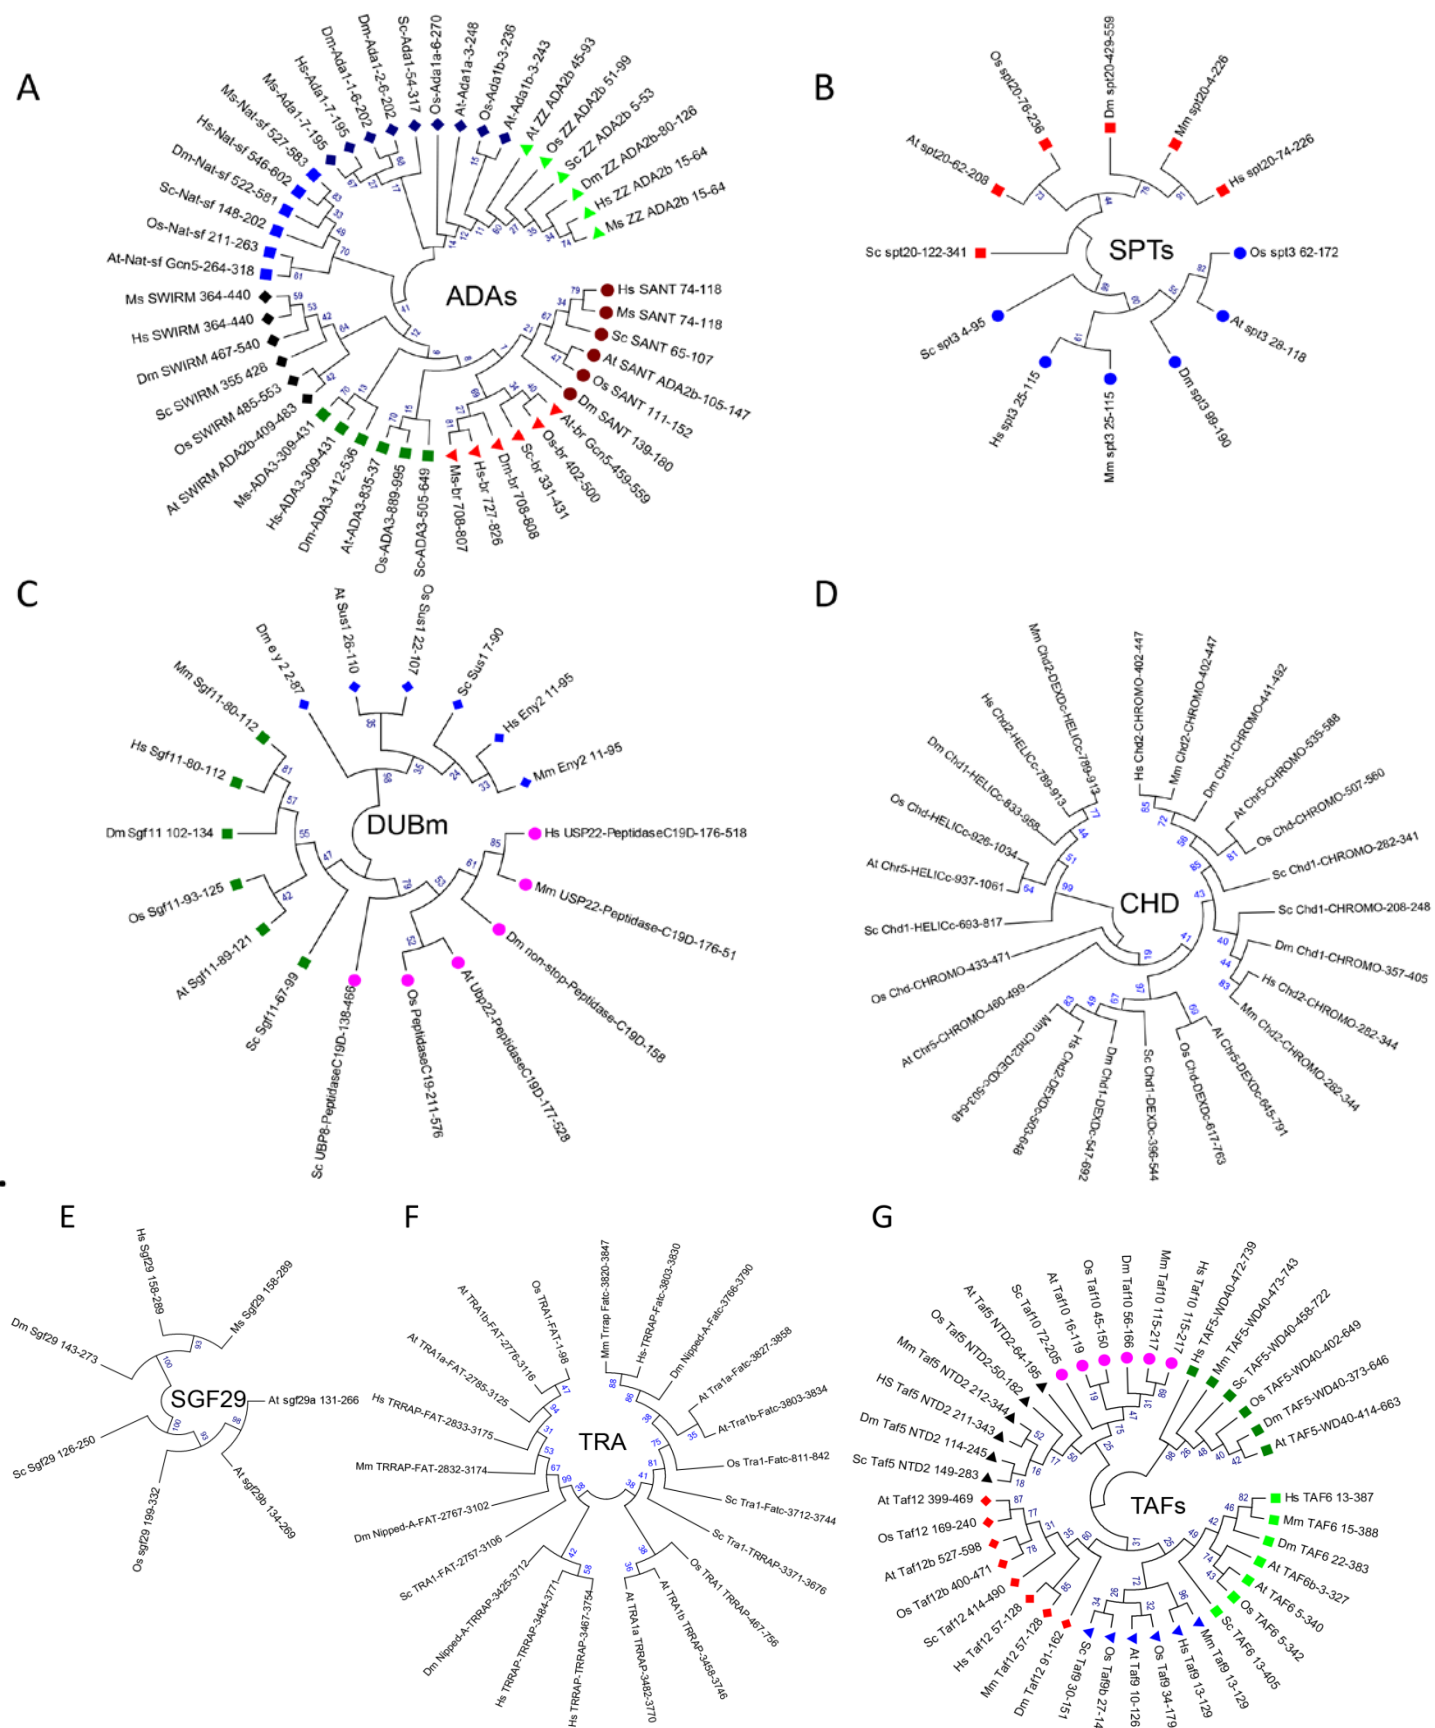

**S3 Fig. Molecular phylogenetic analysis of domains of the SAGA complex components.** Amino acid sequences of domains of the SAGA complex subunits were used from *At*, *A. thaliana*; *Dm*, *D. melongaster*; *Hs*, *H. sapiens*; *Os*, *O. sativa*; *Mm*, *M. musculus*; *Sc*, *S. cerevisiae*. **(A)** Protein domain of ADAs group; **(B)** Protein domain of SPTs group; **(C)** Protein domain of DUBm group; **(D)** Protein domain of CHD subunit; **(E)** Protein domain of SGF29 subunit; **(F)** Protein domain of TRA1 subunit; **(G)** Protein domain of TAFs group.
