# Supplementary material for: Spt-Ada-Gcn5-Acetyltransferase (SAGA) Complex in Plants: Genome Wide Identification, Evolutionary Conservation and Functional Determination
Source: PubMed Central journal article supplement (PMC4532415; doi:10.1371/journal.pone.0134709), 2015-08-11
Supplement: pone.0134709.s006.pdf [file pone.0134709.s006.pdf]

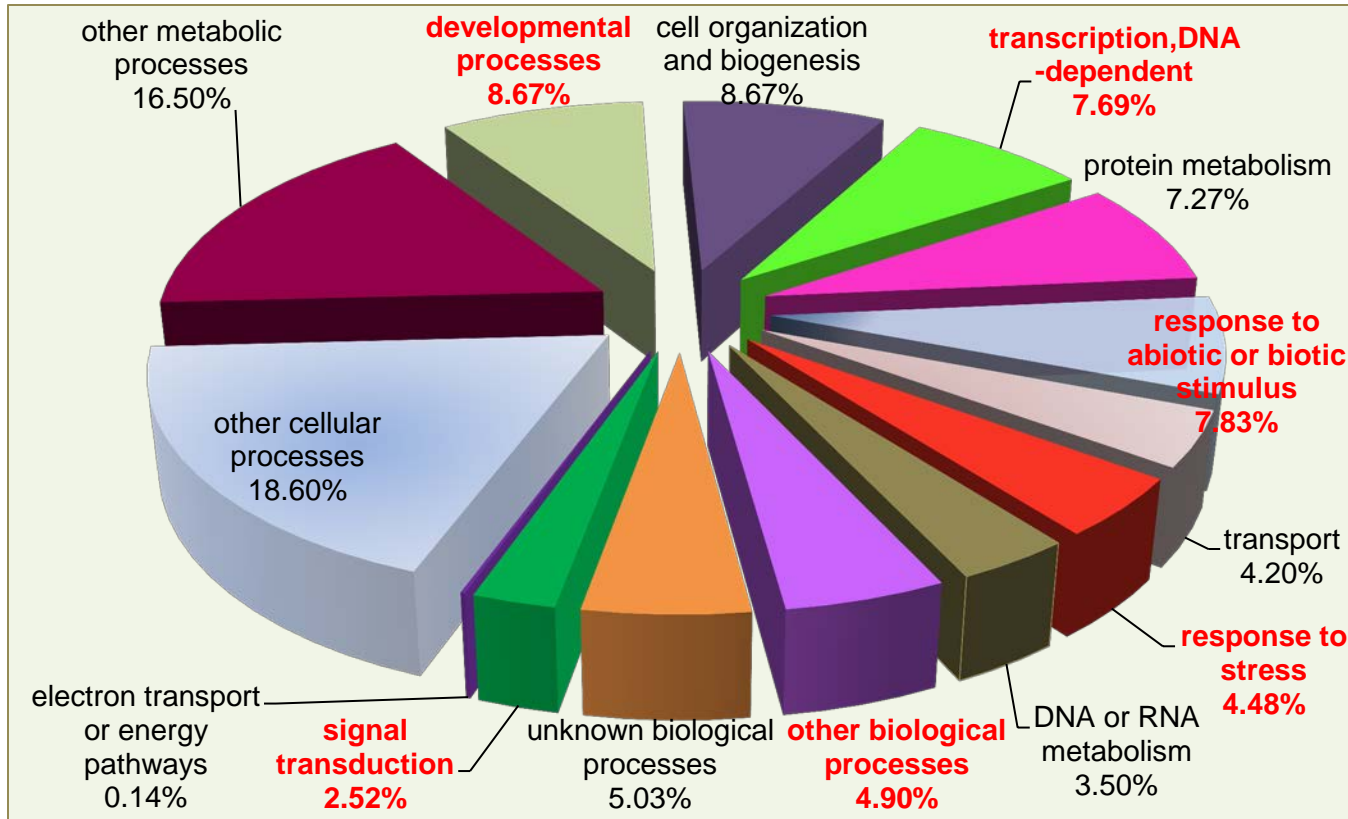

**S6 Fig. Analysis of the biological process of co-expressed gene network.**

A biological process is analyzed by TAIR database using 181 co-expressed genes obtained from ATTED-II database.
