# Supplementary material for: Spt-Ada-Gcn5-Acetyltransferase (SAGA) Complex in Plants: Genome Wide Identification, Evolutionary Conservation and Functional Determination
Source: PubMed Central journal article supplement (PMC4532415; doi:10.1371/journal.pone.0134709), 2015-08-11
Supplement: pone.0134709.s007.pdf [file pone.0134709.s007.pdf]

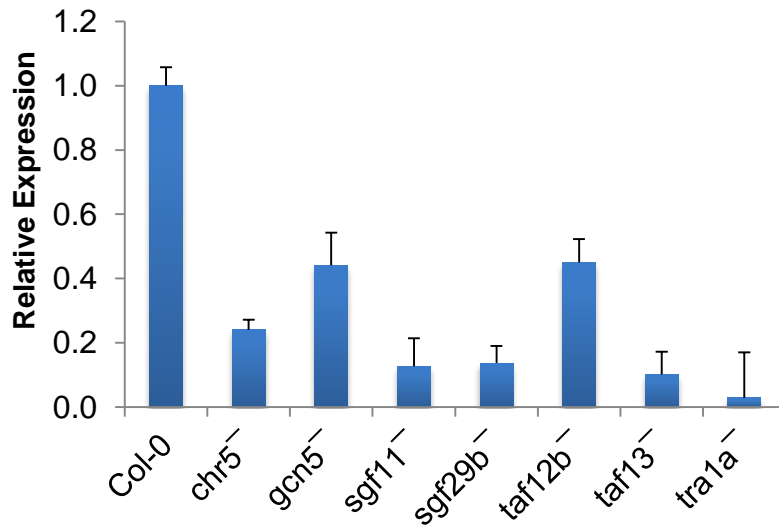

**S7 Fig. Characterization of *Arabidopsis* mutant lines**

Characterization of *Arabidopsis* chr5<sup>-</sup>, gcn5<sup>-</sup>, sgf11<sup>-</sup>, sgf29b<sup>-</sup>, taf12b<sup>-</sup>, taf13<sup>-</sup> and tra1a<sup>-</sup> T-DNA insertion homozygous mutants were done by qRT-PCR. RNA was isolated from homozygous T-DNA insertion mutants and Col-0 leaves or seedlings.
