# Supplementary material for: Spt-Ada-Gcn5-Acetyltransferase (SAGA) Complex in Plants: Genome Wide Identification, Evolutionary Conservation and Functional Determination
Source: PubMed Central journal article supplement (PMC4532415; doi:10.1371/journal.pone.0134709), 2015-08-11
Supplement: pone.0134709.s008.pdf [file pone.0134709.s008.pdf]

**S1 Table:** Query sequences from *S. cerevisiae* and human used to search *Arabidopsis* and *O. sativa* genome for SAGA gene families.

|                     | <b>Yeast</b> |                        | <b>Human</b>   |           | <b><i>Arabidopsis</i></b> |           | <b><i>O. sativa</i></b> |
|---------------------|--------------|------------------------|----------------|-----------|---------------------------|-----------|-------------------------|
| <b>Gcn5 (Ada4)</b>  | NP_011768.1  | GCN5/PCAF              | NP_003875.3    | At-Gcn5   | NP_567002                 | Os-Gcn5   | NP_001064604            |
| <b>Ada1</b>         | NP_015069.1  | ADA1/STAF42            | NP_444281.1    | At-Ada1a  | NP_179091                 | Os-Ada1a  | NP_001067130            |
| <b>Ada2</b>         | NP_010736.1  | ADA2b                  | NP_001479.3    | At-Ada1b  | NP_201542                 | Os-Ada1b  | NP_001051362            |
| <b>Ada3</b>         | NP_010461.1  | ADA3                   | NP_006345.1    | At-Ada2b  | NP_974561                 | Os-Ada2b  | NP_001051287            |
| <b>Spt3</b>         | NP_010680.1  | SPT3                   | NP_003590.1    | At-Ada3   | NP_194708                 | Os-Ada3   | NP_001055276            |
| <b>Spt7</b>         | NP_009637.1  | Spt7                   | NP_055675.1    | At-Spt3   | NP_171768                 | Os-Spt3   | BAD53126                |
| <b>Spt8</b>         | NP_013156.1  | SPT20/FAM48<br>A/p38IP | NP_060039.1    | At-Spt20  | NP_177383                 | Os-Spt20  | NP_001041855            |
| <b>Spt20 (Ada5)</b> | NP_014493.1  | TAF5                   | NP_008882.2    | At-Taf5   | NP_197897                 | Os-Taf5   | NP_001058217            |
| <b>Taf5</b>         | NP_009757.1  | TAF6                   | NP_005632.1    | At-Taf6   | NP_171987                 | Os-Taf6   | NP_001043168            |
| <b>Taf6</b>         | NP_011403.1  | TAF9/TAF9b             | NP_001015892.1 | At-Taf6b  | NP_175838                 |           |                         |
| <b>Taf9</b>         | NP_013963.1  | TAF10                  | NP_006275.1    | At-Taf9   | NP_175816                 | Os-Taf9   | NP_001050338            |
| <b>Taf10</b>        | NP_010451.1  | TAF12                  | NP_001128690.1 |           |                           | Os-Taf9b  | NP_001060252            |
| <b>Taf12</b>        | NP_010429.1  | TRRAP                  | NP_003487.1    | At-Taf10  | NP_194900                 | Os-Taf10  | NP_001063238            |
| <b>Tra1</b>         | NP_011967.1  | SGF29/STAF36           | NP_612423.1    | At-Taf12  | NP_566367                 | Os-Taf12  | NP_001044860            |
| <b>Sgf29</b>        | NP_009917.1  | USP22                  | NP_056091.1    | At-Taf12b | NP_849680                 | Os-Taf12b | NP_001044793            |
| <b>Ubp8</b>         | NP_013950.1  | ATXN7L3                | NP_001092303.  | At-Tra1a  | NP_179383                 | Os-Tra1   | NP_001060452            |
| <b>Sgf11</b>        | NP_015278.1  | ENY2                   | NP_064574.1    | At-Tra1b  | NP_680770                 |           |                         |
| <b>Sus1</b>         | NP_878049.2  | ATXN7                  | NP_000324.1    | At-Sgf29a | NP_189382                 | Os-Sgf29  | NP_001066601            |
| <b>Sgf73</b>        | NP_011449.1  | Chd1                   | NP_001262.3    | At-Sgf29b | NP_198871                 |           |                         |
| <b>Chd1</b>         | NP_011091.1  |                        |                | At-Ubp22  | NP_568239                 | Os-Ubp22  | NP_001054070            |
|                     |              |                        |                | At-Sgf11  | NP_200665                 | Os-Sgf11  | NP_001055278            |
|                     |              |                        |                | At-Sus1   | NP_189346                 | Os-Sus1   | NP_001045218            |
|                     |              |                        |                | At-Chd1   | NP_178970                 | Os-Chd1   | EEE67748                |
