# Supplementary material for: Spt-Ada-Gcn5-Acetyltransferase (SAGA) Complex in Plants: Genome Wide Identification, Evolutionary Conservation and Functional Determination
Source: PubMed Central journal article supplement (PMC4532415; doi:10.1371/journal.pone.0134709), 2015-08-11
Supplement: pone.0134709.s009.pdf [file pone.0134709.s009.pdf]

**S2 Table:** Protein similarities of SAGA encoding gene in *Arabidopsis*, *O. sativa*, human and *S. cerevisiae*.

| SAGA Subunits      | <i>Arabidopsis thaliana</i> |       |                  | <i>Oryza sativa</i> |       | Human |
|--------------------|-----------------------------|-------|------------------|---------------------|-------|-------|
|                    | Human                       | Yeast | <i>O. sativa</i> | Human               | Yeast | Yeast |
| <b>ADA1a</b>       | 31.8                        | 26.2  | 51./56.3         | 35.0                | 30.5  | 31.2  |
| <b>ADA1b</b>       | 32.8                        | 27.3  | 48.1/56.3        | 35.1                | 28.6  | -     |
| <b>ADA2b</b>       | 44.5                        | 49.1  | 68.3             | 41.3                | 44.1  | 52.7  |
| <b>ADA3</b>        | 16.3                        | 26.3  | 51.3             | 15.3                | 24.4  | 28.3  |
| <b>CHD1</b>        | 46.6                        | 44.5  | 72.2             | 47.1                | 45.0  | 45.1  |
| <b>GCN5(ADA4)</b>  | 37.7                        | 50.8  | 72.4             | 35.6                | 53.9  | 34.0  |
| <b>SGF11</b>       | 23.8                        | 22.5  | 60.7             | 23.2                | 30.5  | 15.3  |
| <b>SGF29a</b>      | 45.2                        | 42.9  | 75.0             | 43.0                | 39.7  | 34.0  |
| <b>SGF29b</b>      | 47.0                        | 40.2  | 77.1             | -                   | -     | -     |
| <b>SPT20(ADA5)</b> | 23.1                        | 20.8  | 25.9             | 35.3                | 25.9  | 32.5  |
| <b>SPT3</b>        | 23.5                        | 17.2  | 58.5             | 24.3                | 23.1  | 30.0  |
| <b>SUS1</b>        | 65.5                        | 43.6  | 85.5             | 68.1                | 44.2  | 55.9  |
| <b>TAF10</b>       | 36.6                        | 40.0  | 72.1             | 41.5                | 36.4  | 39.9  |
| <b>TAF12</b>       | 16.4                        | 39.1  | 31.2/50.5        | 37.5                | 34.5  | 19.6  |
| <b>TAF12b</b>      | 21.0                        | 39.5  | 36.2/42.9        | 19.9                | 37.8  | -     |
| <b>TAF5</b>        | 48.7                        | 49.2  | 82.1             | 47.8                | 47.5  | 49.9  |
| <b>TAF6</b>        | 46.3                        | 47.9  | 77.7             | 47.0                | 53.6  | 39.9  |
| <b>TAF6b</b>       | 40.7                        | 43.3  | 67.3             | -                   | -     | -     |
| <b>TAF9</b>        | 39.7                        | 41.4  | 57.9             | 42.2                | 35.3  | 29.4  |
| <b>TAF9b</b>       | -                           | -     | 26.6             | 32.3                | 18.1  | 29.4  |
| <b>TRA1a</b>       | 49.9                        | 48.8  | 19.3             | 10.5                | 11.3  | 50.7  |
| <b>TRA1b</b>       | 50.3                        | 48.4  | 19.2             | -                   | -     | -     |
| <b>UBP8</b>        | 51.6                        | 42.7  | 57.1             | 48.5                | 39.0  | 45.0  |
