# Supplementary material for: Spt-Ada-Gcn5-Acetyltransferase (SAGA) Complex in Plants: Genome Wide Identification, Evolutionary Conservation and Functional Determination
Source: PubMed Central journal article supplement (PMC4532415; doi:10.1371/journal.pone.0134709), 2015-08-11
Supplement: pone.0134709.s010.pdf [file pone.0134709.s010.pdf]

**S3 Table:** List of primer used in qRT-PCR

| S.No. | Locus ID    | Primer Sequence                  |
|-------|-------------|----------------------------------|
| 1     | AT4G05320 F | 5' CACTCCACTTGGTCTTGCCT3'        |
| 2     | AT4G05320 R | 5' TGGTCTTTCCGGTGAGAGTCTTCA3'    |
| 3     | AT2G13370 F | 5' GGGCATTGACACAGCAAAGTT3'       |
| 4     | AT2G13370 R | 5' TCGTTGGTCGCTCAGTCTGA3'        |
| 5     | AT5G40550 F | 5' GGGACAACAGCACTCTACAAAGC3'     |
| 6     | AT5G40550 R | 5' CAATGCTCCATCTTCCTCATCAT3'     |
| 7     | AT1G02680 F | 5' CCCATTATCTAGCATCCCGTATATATC3' |
| 8     | AT1G02680 R | 5' CAAAAATCGGGTGGTTATTCTAAATT3'  |
| 9     | AT2G17930 F | 5' TGATGAGCGGAAGCCATATG3'        |
| 10    | AT2G17930 R | 5' GACCTCCCACCAATTTGTAGCA3'      |
| 11    | AT5G10790 F | 5' TGTATCACCCACAAGGCATTCT3'      |
| 12    | AT5G10790 R | 5' AAACGGGTCATATGTTGTTGATGT3'    |
| 13    | AT1G72390 F | 5' GTCTGTTCTTGGCATCGGTAA3'       |
| 14    | AT1G72390 R | 5' TTAATGCACCAGATCGGAGTTG3'      |
| 15    | AT3G54610 F | 5' GTAGAACTTACAACCTCCCGGATAACC3' |
| 16    | AT3G54610 R | 5' GATTGGAGACCTGCTTGTACTTTGCT3'  |
| 17    | AT5G67410 F | 5' CGGGCCAAAACAGAGAGTTA3'        |
| 18    | AT5G67410 R | 5' ATTCTCCCTCTTACCGTCA3'         |
| 19    | AT5G58575 F | 5' GCAACAACCTCGAAACCAACA3'       |
| 20    | AT5G58575 R | 5' CGCCACAGTTCATGCAAT3'          |
| 21    | AT1G04950 F | 5' CCCACCTTTACCATCTCCGTC3'       |
| 22    | AT1G04950 R | 5' TGTGGGGATCAGTACTGATTATC3'     |
| 23    | AT1G67090 F | 5' ATGGCTTCTCTATGCTCTCTTC3'      |
| 24    | AT1G67090 R | 5' TTCGGAATCGGTAAGGTCAGGA3'      |
| 25    | AT5G12030 F | 5' TGCTTGTGGTGAGTGGCAA3'         |
| 26    | AT5G12030 R | 5' TTCCCATCCTCCTCTCCAT3'         |
| 27    | AT1G71000 F | 5' GGTGGCATTAGGCAAACGTATT3'      |
| 28    | AT1G71000 R | 5' GCTTGTGATATGCTCGTCGTATCT3'    |
| 29    | AT2G40140 F | 5' CTCAGATGAACCACTATCCGTCTTC3'   |
| 30    | AT2G40140 R | 5' CAAACGCTGAGGATCTTGCAT3'       |
| 31    | AT4G02770 F | 5' ATGGCAACTCAAGCCGCCGG3'        |
| 32    | AT4G02770 R | 5' ATCGGAGACGGTGTGTTTGGGT3'      |
| 33    | AT1G56600 F | 5' GCGGTTTTGCCGGATGT3'           |
| 34    | AT1G56600 R | 5' GGTTTGATTCTCCGGTGGATAA3'      |
| 35    | AT1G17440 F | 5' CTCCGGCGATGACTGTAAC3'         |
| 36    | AT1G17440 R | 5' CCGATTGGTGGGTTAGAAGA3'        |
