# Supplementary material for: Spt-Ada-Gcn5-Acetyltransferase (SAGA) Complex in Plants: Genome Wide Identification, Evolutionary Conservation and Functional Determination
Source: PubMed Central journal article supplement (PMC4532415; doi:10.1371/journal.pone.0134709), 2015-08-11
Supplement: pone.0134709.s011.pdf [file pone.0134709.s011.pdf]

**S4 Table:** Gene Ontology list of *Arabidopsis* and *O. sativa* for SAGA complex gene.

***Arabidopsis* SAGA Gene Ontology**

| <b>Cellular component</b>          | <b>Molecular function</b>                                   | <b>Biological process</b>                                                 |
|------------------------------------|-------------------------------------------------------------|---------------------------------------------------------------------------|
| Chloroplast                        | ATP binding                                                 | Chromatin assembly or disassembly                                         |
| Chloroplast envelope               | Chromatin binding                                           | Cold acclimation                                                          |
| Cytosol                            | DNA binding                                                 | Cytokinin mediated signaling pathway                                      |
| Histone acetyltransferase complex  | H3 histone acetyltransferase activity                       | Flower development                                                        |
| Nucleus                            | Helicase activity                                           | Histone acetylation                                                       |
| Plasmodesma                        | Histone acetyltransferase activity                          | Histone h3 acetylation                                                    |
| Transcription factor complex       | Inositol or phosphatidylinositol kinase activity            | Histone h4 acetylation                                                    |
| Transcription factor tfiid complex | Nucleic acid binding                                        | Jasmonic acid mediated signaling pathway                                  |
|                                    | Nucleotide binding                                          | Phosphorylation                                                           |
|                                    | Phosphotransferase activity, alcohol group as acceptor      | Pollen tube growth                                                        |
|                                    | Protein binding                                             | Positive regulation of transcription, dna-dependent                       |
|                                    | Sequence-specific dna binding transcription factor activity | Regulation of cell proliferation                                          |
|                                    | Transcription coactivator activity                          | Regulation of ethylene mediated signaling pathway                         |
|                                    | Ubiquitin thiolesterase activity                            | Regulation of sequence-specific dna binding transcription factor activity |
|                                    | Ubiquitin-specific protease activity                        | Regulation of transcription, dna-dependent                                |
|                                    | Zinc ion binding                                            | Response to auxin stimulus                                                |
|                                    |                                                             | Response to cytokinin stimulus                                            |
|                                    |                                                             | Response to light stimulus                                                |
|                                    |                                                             | Response to salt stress                                                   |
|                                    |                                                             | Root morphogenesis                                                        |
|                                    |                                                             | Transcription from rna polymerase ii promoter                             |
|                                    |                                                             | Transcription initiation, dna-dependent                                   |
|                                    |                                                             | Ubiquitin-dependent protein catabolic process                             |

***O. sativa* SAGA Gene Ontology**

| <b>Cellular component</b> | <b>Molecular function</b>        | <b>Biological process</b>                      |
|---------------------------|----------------------------------|------------------------------------------------|
| Golgi apparatus           | DNA binding                      | Transport                                      |
| Plasma membrane           | Transcription factor activity    | Signal transduction                            |
| Membrane                  | Nucleotide binding               | Cellular component organization and biogenesis |
| Nucleus                   | Signal transducer activity       | Transcription                                  |
| Nucleoplasm               | Transporter activity             | Catabolic process                              |
| Intracellular             | Transcription regulator activity | Cellular process                               |
|                           | Kinase activity                  | Protein metabolic process                      |
|                           | Hydrolase activity               |                                                |
