# Supplementary material for: Spt-Ada-Gcn5-Acetyltransferase (SAGA) Complex in Plants: Genome Wide Identification, Evolutionary Conservation and Functional Determination
Source: PubMed Central journal article supplement (PMC4532415; doi:10.1371/journal.pone.0134709), 2015-08-11
Supplement: pone.0134709.s012.pdf [file pone.0134709.s012.pdf]

**S5 Table:** List of *Arabidopsis* SAGA complex subunits known and predicted protein interactions from STRING database.

| #Node1 | Node2  | Neighborhood | Fusion | Co-occurrence | Homology | Co-expression | Experimental | Knowledge | Text mining | Combined Score |
|--------|--------|--------------|--------|---------------|----------|---------------|--------------|-----------|-------------|----------------|
| ADA2B  | CHR5   | 0            | 0      | 0             | 0        | 0             | 0.641        | 0         | 0           | 0.641          |
| ADA2B  | GCN5   | 0            | 0      | 0             | 0        | 0             | 0.998        | 0         | 0.908       | 0.999          |
| ADA2B  | HAF01  | 0            | 0      | 0             | 0        | 0             | 0.713        | 0         | 0           | 0.713          |
| ADA2B  | SGF29a | 0            | 0      | 0             | 0        | 0             | 0.714        | 0         | 0.292       | 0.784          |
| ADA2B  | TAF12  | 0            | 0      | 0             | 0        | 0             | 0.714        | 0         | 0.429       | 0.826          |
| ADA2B  | TAF12B | 0            | 0      | 0             | 0        | 0             | 0.714        | 0         | 0.429       | 0.826          |
| ADA2B  | TAF6   | 0            | 0      | 0             | 0        | 0             | 0.714        | 0         | 0.429       | 0.826          |
| ADA2B  | TAF6B4 | 0            | 0      | 0             | 0        | 0             | 0.714        | 0         | 0.429       | 0.826          |
| ADA2B  | TAF9   | 0            | 0      | 0             | 0        | 0             | 0.769        | 0.526     | 0.758       | 0.969          |
| ADA2B  | TRA1b  | 0            | 0      | 0             | 0        | 0             | 0.714        | 0         | 0.429       | 0.826          |
| CHR5   | TAF9   | 0            | 0      | 0             | 0        | 0             | 0.604        | 0         | 0           | 0.604          |
| ENY2   | TAF9   | 0            | 0      | 0             | 0        | 0             | 0            | 0         | 0.818       | 0.818          |
| ENY2   | TRA1b  | 0            | 0      | 0             | 0        | 0             | 0.622        | 0         | 0           | 0.622          |
| GCN5   | CHR5   | 0            | 0      | 0             | 0        | 0             | 0.593        | 0         | 0.234       | 0.667          |
| GCN5   | HAF01  | 0            | 0      | 0             | 0        | 0             | 0.638        | 0         | 0.207       | 0.693          |
| GCN5   | SGF29a | 0            | 0      | 0             | 0        | 0             | 0.648        | 0         | 0.24        | 0.714          |
| GCN5   | TAF12  | 0            | 0      | 0             | 0        | 0             | 0.638        | 0.525     | 0.344       | 0.871          |
| GCN5   | TAF12B | 0            | 0      | 0             | 0        | 0             | 0.638        | 0.525     | 0.344       | 0.871          |
| GCN5   | TAF6   | 0            | 0      | 0             | 0        | 0             | 0.647        | 0         | 0.336       | 0.749          |
| GCN5   | TAF6B4 | 0            | 0      | 0             | 0        | 0             | 0.647        | 0         | 0.336       | 0.749          |
| GCN5   | TAF9   | 0            | 0      | 0             | 0        | 0             | 0.72         | 0.526     | 0.368       | 0.904          |
| GCN5   | TRA1b  | 0            | 0      | 0             | 0        | 0             | 0.648        | 0.525     | 0.336       | 0.873          |
| HAF01  | TAF12B | 0            | 0      | 0             | 0        | 0             | 0.999        | 0.9       | 0.344       | 0.999          |
| HAF01  | TAF13  | 0            | 0      | 0             | 0        | 0             | 0.769        | 0.9       | 0.5         | 0.986          |
| HAF01  | TAF6   | 0            | 0      | 0             | 0        | 0             | 0            | 0.9       | 0.499       | 0.946          |
| SGF11  | ADA2B  | 0            | 0      | 0             | 0        | 0             | 0.768        | 0         | 0.5         | 0.876          |
| SGF11  | ENY2   | 0            | 0      | 0             | 0        | 0             | 0.797        | 0         | 0.372       | 0.864          |
| SGF11  | GCN5   | 0            | 0      | 0             | 0        | 0             | 0.72         | 0         | 0.368       | 0.811          |
| SGF11  | SGF29a | 0            | 0      | 0             | 0        | 0             | 0.72         | 0         | 0.336       | 0.801          |
| SGF11  | SGF29b | 0            | 0      | 0             | 0        | 0             | 0.72         | 0         | 0.336       | 0.801          |
| SGF11  | TAF10  | 0            | 0      | 0             | 0        | 0             | 0.775        | 0         | 0.549       | 0.891          |
| SGF11  | TAF12  | 0            | 0      | 0             | 0        | 0             | 0.72         | 0         | 0.544       | 0.863          |
| SGF11  | TAF12B | 0            | 0      | 0             | 0        | 0             | 0.72         | 0         | 0.544       | 0.863          |
| SGF11  | TAF5   | 0            | 0      | 0             | 0        | 0             | 0.768        | 0         | 0.544       | 0.887          |
| SGF11  | TAF6   | 0            | 0      | 0             | 0        | 0             | 0.768        | 0         | 0.544       | 0.887          |
| SGF11  | TAF6B4 | 0            | 0      | 0             | 0        | 0             | 0.768        | 0         | 0.544       | 0.887          |
| SGF11  | TAF9   | 0            | 0      | 0             | 0        | 0             | 0.775        | 0         | 0.549       | 0.891          |
| SGF11  | TRA1a  | 0            | 0      | 0             | 0        | 0             | 0.72         | 0         | 0.544       | 0.863          |
| SGF11  | TRA1b  | 0            | 0      | 0             | 0        | 0             | 0.72         | 0         | 0.544       | 0.863          |
| SGF11  | UBP22  | 0            | 0      | 0             | 0        | 0             | 0.775        | 0         | 0.858       | 0.966          |
| SGF29a | TAF12  | 0            | 0      | 0             | 0        | 0             | 0.712        | 0         | 0.236       | 0.765          |
| SGF29a | TAF12B | 0            | 0      | 0             | 0        | 0             | 0.712        | 0         | 0.236       | 0.765          |
| SGF29a | TAF6   | 0            | 0      | 0             | 0        | 0             | 0.713        | 0         | 0.096       | 0.723          |

|        |        |   |   |   |      |       |       |       |       |       |
|--------|--------|---|---|---|------|-------|-------|-------|-------|-------|
| SGF29a | TAF6B4 | 0 | 0 | 0 | 0    | 0     | 0.713 | 0     | 0.096 | 0.723 |
| SGF29a | TAF9   | 0 | 0 | 0 | 0    | 0     | 0.72  | 0     | 0     | 0.72  |
| SGF29a | TRA1b  | 0 | 0 | 0 | 0    | 0     | 0.712 | 0     | 0.121 | 0.73  |
| SGF29b | ADA2B  | 0 | 0 | 0 | 0    | 0     | 0.714 | 0     | 0.292 | 0.784 |
| SGF29b | GCN5   | 0 | 0 | 0 | 0    | 0     | 0.648 | 0     | 0.24  | 0.714 |
| SGF29b | TAF10  | 0 | 0 | 0 | 0    | 0     | 0.72  | 0     | 0.119 | 0.736 |
| SGF29b | TAF12  | 0 | 0 | 0 | 0    | 0     | 0.712 | 0     | 0.236 | 0.765 |
| SGF29b | TAF12B | 0 | 0 | 0 | 0    | 0     | 0.712 | 0     | 0.236 | 0.765 |
| SGF29b | TAF5   | 0 | 0 | 0 | 0    | 0     | 0.712 | 0     | 0.122 | 0.73  |
| SGF29b | TAF6   | 0 | 0 | 0 | 0    | 0     | 0.713 | 0     | 0.096 | 0.723 |
| SGF29b | TAF6B4 | 0 | 0 | 0 | 0    | 0     | 0.713 | 0     | 0.096 | 0.723 |
| SGF29b | TAF9   | 0 | 0 | 0 | 0    | 0     | 0.72  | 0     | 0     | 0.72  |
| SGF29b | TRA1a  | 0 | 0 | 0 | 0    | 0     | 0.712 | 0     | 0.121 | 0.73  |
| SGF29b | TRA1b  | 0 | 0 | 0 | 0    | 0     | 0.712 | 0     | 0.121 | 0.73  |
| SGF29b | UBP22  | 0 | 0 | 0 | 0    | 0     | 0.72  | 0     | 0.28  | 0.785 |
| TAF10  | ADA2B  | 0 | 0 | 0 | 0    | 0     | 0.769 | 0     | 0.5   | 0.877 |
| TAF10  | CHR5   | 0 | 0 | 0 | 0    | 0     | 0.604 | 0     | 0     | 0.604 |
| TAF10  | ENY2   | 0 | 0 | 0 | 0    | 0     | 0.715 | 0     | 0.122 | 0.733 |
| TAF10  | GCN5   | 0 | 0 | 0 | 0    | 0     | 0.72  | 0.526 | 0.759 | 0.963 |
| TAF10  | HAF01  | 0 | 0 | 0 | 0    | 0     | 0.999 | 0.9   | 0.424 | 0.999 |
| TAF10  | SGF29a | 0 | 0 | 0 | 0    | 0     | 0.72  | 0     | 0.119 | 0.736 |
| TAF10  | TAF12  | 0 | 0 | 0 | 0    | 0     | 0.999 | 0.949 | 0.587 | 0.999 |
| TAF10  | TAF12B | 0 | 0 | 0 | 0    | 0     | 0.999 | 0.949 | 0.567 | 0.999 |
| TAF10  | TAF13  | 0 | 0 | 0 | 0    | 0     | 0.999 | 0.955 | 0.586 | 0.999 |
| TAF10  | TAF6   | 0 | 0 | 0 | 0    | 0     | 0     | 0.949 | 0.57  | 0.976 |
| TAF10  | TAF6B4 | 0 | 0 | 0 | 0    | 0     | 0.999 | 0.949 | 0     | 0.999 |
| TAF10  | TAF9   | 0 | 0 | 0 | 0    | 0.071 | 0.999 | 0.954 | 0.79  | 0.999 |
| TAF10  | TRA1b  | 0 | 0 | 0 | 0    | 0     | 0.768 | 0.527 | 0.717 | 0.964 |
| TAF12  | HAF01  | 0 | 0 | 0 | 0    | 0     | 0.999 | 0.9   | 0.344 | 0.999 |
| TAF12  | TAF12B | 0 | 0 | 0 | 0.81 | 0     | 0.999 | 0.9   | 0.749 | 0.999 |
| TAF12  | TAF13  | 0 | 0 | 0 | 0    | 0     | 0.999 | 0.949 | 0.544 | 0.999 |
| TAF12  | TAF6   | 0 | 0 | 0 | 0    | 0     | 0     | 0.949 | 0     | 0.949 |
| TAF12  | TAF6B4 | 0 | 0 | 0 | 0    | 0     | 0.999 | 0.949 | 0     | 0.999 |
| TAF12  | TAF9   | 0 | 0 | 0 | 0    | 0     | 0.999 | 0.949 | 0.544 | 0.999 |
| TAF12  | TRA1b  | 0 | 0 | 0 | 0    | 0     | 0.713 | 0.525 | 0.432 | 0.912 |
| TAF12B | TAF13  | 0 | 0 | 0 | 0    | 0     | 0.999 | 0.949 | 0.565 | 0.999 |
| TAF12B | TAF6   | 0 | 0 | 0 | 0    | 0     | 0     | 0.949 | 0.287 | 0.961 |
| TAF5   | ADA2B  | 0 | 0 | 0 | 0    | 0     | 0.713 | 0     | 0.429 | 0.825 |
| TAF5   | GCN5   | 0 | 0 | 0 | 0    | 0     | 0.648 | 0     | 0.645 | 0.866 |
| TAF5   | HAF01  | 0 | 0 | 0 | 0    | 0     | 0.999 | 0.9   | 0.499 | 0.999 |
| TAF5   | SGF29a | 0 | 0 | 0 | 0    | 0     | 0.712 | 0     | 0.122 | 0.73  |
| TAF5   | TAF10  | 0 | 0 | 0 | 0    | 0     | 0.999 | 0.949 | 0.28  | 0.999 |
| TAF5   | TAF12  | 0 | 0 | 0 | 0    | 0     | 0.999 | 0.949 | 0.595 | 0.999 |
| TAF5   | TAF12B | 0 | 0 | 0 | 0    | 0     | 0.999 | 0.949 | 0     | 0.999 |
| TAF5   | TAF13  | 0 | 0 | 0 | 0    | 0     | 0.768 | 0.949 | 0.596 | 0.994 |
| TAF5   | TAF6   | 0 | 0 | 0 | 0    | 0     | 0     | 0.949 | 0.564 | 0.976 |
| TAF5   | TAF6B4 | 0 | 0 | 0 | 0    | 0     | 0.999 | 0.949 | 0.564 | 0.999 |
| TAF5   | TAF9   | 0 | 0 | 0 | 0    | 0.074 | 0.999 | 0.949 | 0.544 | 0.999 |
| TAF5   | TRA1a  | 0 | 0 | 0 | 0    | 0     | 0.713 | 0     | 0.432 | 0.826 |
| TAF5   | TRA1b  | 0 | 0 | 0 | 0    | 0     | 0.713 | 0     | 0.432 | 0.826 |
| TAF5   | UBP22  | 0 | 0 | 0 | 0    | 0     | 0.663 | 0     | 0.5   | 0.82  |
| TAF6   | TAF13  | 0 | 0 | 0 | 0    | 0     | 0     | 0.949 | 0.254 | 0.959 |

|        |        |   |   |   |       |       |       |       |       |       |
|--------|--------|---|---|---|-------|-------|-------|-------|-------|-------|
| TAF6B4 | HAF01  | 0 | 0 | 0 | 0     | 0     | 0.999 | 0.9   | 0.499 | 0.999 |
| TAF6B4 | TAF12B | 0 | 0 | 0 | 0     | 0     | 0.999 | 0.949 | 0     | 0.999 |
| TAF6B4 | TAF13  | 0 | 0 | 0 | 0     | 0     | 0.999 | 0.949 | 0.135 | 0.999 |
| TAF6B4 | TAF6   | 0 | 0 | 0 | 0.916 | 0.108 | 0.999 | 0.9   | 0     | 0.999 |
| TAF6B4 | TAF9   | 0 | 0 | 0 | 0     | 0     | 0.999 | 0.949 | 0.547 | 0.999 |
| TAF9   | HAF01  | 0 | 0 | 0 | 0     | 0     | 0.772 | 0.9   | 0.342 | 0.982 |
| TAF9   | TAF12B | 0 | 0 | 0 | 0     | 0     | 0     | 0.949 | 0.544 | 0.975 |
| TAF9   | TAF13  | 0 | 0 | 0 | 0     | 0.07  | 0.8   | 0.954 | 0.115 | 0.99  |
| TAF9   | TAF6   | 0 | 0 | 0 | 0     | 0     | 0.999 | 0.949 | 0.981 | 0.999 |
| TRA1a  | ADA2B  | 0 | 0 | 0 | 0     | 0     | 0.714 | 0     | 0.429 | 0.826 |
| TRA1a  | ENY2   | 0 | 0 | 0 | 0     | 0     | 0.622 | 0     | 0     | 0.622 |
| TRA1a  | GCN5   | 0 | 0 | 0 | 0     | 0     | 0.648 | 0.525 | 0.336 | 0.873 |
| TRA1a  | SGF29a | 0 | 0 | 0 | 0     | 0     | 0.712 | 0     | 0.121 | 0.73  |
| TRA1a  | TAF10  | 0 | 0 | 0 | 0     | 0     | 0.768 | 0.527 | 0     | 0.883 |
| TRA1a  | TAF12  | 0 | 0 | 0 | 0     | 0     | 0.713 | 0.525 | 0.432 | 0.912 |
| TRA1a  | TAF12B | 0 | 0 | 0 | 0     | 0     | 0.713 | 0.525 | 0.432 | 0.912 |
| TRA1a  | TAF6   | 0 | 0 | 0 | 0     | 0     | 0.713 | 0     | 0     | 0.713 |
| TRA1a  | TAF6B4 | 0 | 0 | 0 | 0     | 0     | 0.713 | 0     | 0     | 0.713 |
| TRA1a  | TAF9   | 0 | 0 | 0 | 0     | 0     | 0.768 | 0.526 | 0     | 0.883 |
| TRA1b  | CHR5   | 0 | 0 | 0 | 0     | 0.294 | 0.54  | 0     | 0.092 | 0.664 |
| TRA1b  | TAF12B | 0 | 0 | 0 | 0     | 0     | 0.713 | 0.525 | 0.432 | 0.912 |
| TRA1b  | TAF6   | 0 | 0 | 0 | 0     | 0     | 0.713 | 0     | 0.921 | 0.975 |
| TRA1b  | TAF6B4 | 0 | 0 | 0 | 0     | 0     | 0.713 | 0     | 0     | 0.713 |
| TRA1b  | TAF9   | 0 | 0 | 0 | 0     | 0     | 0.768 | 0.526 | 0.993 | 0.999 |
| UBP22  | ADA2B  | 0 | 0 | 0 | 0     | 0     | 0.663 | 0     | 0.368 | 0.773 |
| UBP22  | ENY2   | 0 | 0 | 0 | 0     | 0     | 0.544 | 0     | 0.372 | 0.694 |
| UBP22  | GCN5   | 0 | 0 | 0 | 0     | 0     | 0.719 | 0     | 0.34  | 0.802 |
| UBP22  | SGF29a | 0 | 0 | 0 | 0     | 0     | 0.72  | 0     | 0.28  | 0.785 |
| UBP22  | TAF10  | 0 | 0 | 0 | 0     | 0     | 0.72  | 0     | 0.544 | 0.863 |
| UBP22  | TAF12  | 0 | 0 | 0 | 0     | 0     | 0.662 | 0     | 0.5   | 0.819 |
| UBP22  | TAF12B | 0 | 0 | 0 | 0     | 0     | 0.662 | 0     | 0.5   | 0.819 |
| UBP22  | TAF6   | 0 | 0 | 0 | 0     | 0     | 0.663 | 0     | 0.5   | 0.82  |
| UBP22  | TAF6B4 | 0 | 0 | 0 | 0     | 0     | 0.663 | 0     | 0.5   | 0.82  |
| UBP22  | TAF9   | 0 | 0 | 0 | 0     | 0     | 0.72  | 0     | 0.544 | 0.863 |
| UBP22  | TRA1a  | 0 | 0 | 0 | 0     | 0     | 0.72  | 0     | 0.5   | 0.85  |
| UBP22  | TRA1b  | 0 | 0 | 0 | 0     | 0     | 0.72  | 0     | 0.5   | 0.85  |
