# Supplementary material for: Spt-Ada-Gcn5-Acetyltransferase (SAGA) Complex in Plants: Genome Wide Identification, Evolutionary Conservation and Functional Determination
Source: PubMed Central journal article supplement (PMC4532415; doi:10.1371/journal.pone.0134709), 2015-08-11
Supplement: pone.0134709.s013.pdf [file pone.0134709.s013.pdf]

**S6 Table:** List of *S. cerevisiae* SAGA complex subunits known and predicted protein interactions from STRING database.

| #Node1 | Node2 | Node1 External ID | Node2 External ID | Neighborhood | Fusion | Co-occurrence | Homology | Co-expression | Experimental | Knowledge | Text mining | Combined Score |
|--------|-------|-------------------|-------------------|--------------|--------|---------------|----------|---------------|--------------|-----------|-------------|----------------|
| ADA2   | TAF10 | YDR448W           | YDR167W           | 0            | 0      | 0             | 0        | 0             | 0.999        | 0.9       | 0.728       | 0.999          |
| ADA2   | SUS1  | YDR448W           | YBR111W-A         | 0            | 0      | 0             | 0        | 0             | 0.999        | 0.9       | 0           | 0.999          |
| ADA2   | TAF5  | YDR448W           | YBR198C           | 0            | 0      | 0             | 0        | 0             | 0.999        | 0.9       | 0.728       | 0.999          |
| ADA2   | TAF12 | YDR448W           | YDR145W           | 0            | 0      | 0             | 0        | 0             | 0.999        | 0.9       | 0.728       | 0.999          |
| ADA2   | SPT7  | YDR448W           | YBR081C           | 0            | 0      | 0             | 0        | 0             | 0.999        | 0.9       | 0.774       | 0.999          |
| ADA2   | SGF29 | YDR448W           | YCL010C           | 0            | 0      | 0             | 0        | 0             | 0.999        | 0.9       | 0.271       | 0.999          |
| ADA2   | NGG1  | YDR448W           | YDR176W           | 0            | 0      | 0             | 0        | 0             | 0.999        | 0.9       | 0.896       | 0.999          |
| ADA2   | SPT3  | YDR448W           | YDR392W           | 0            | 0      | 0             | 0        | 0             | 0.999        | 0.9       | 0.779       | 0.999          |
| CHD1   | SGF29 | YER164W           | YCL010C           | 0            | 0      | 0             | 0        | 0             | 0.814        | 0.9       | 0.094       | 0.98           |
| CHD1   | SPT7  | YER164W           | YBR081C           | 0            | 0      | 0             | 0        | 0.115         | 0.814        | 0.9       | 0.488       | 0.989          |
| CHD1   | TAF12 | YER164W           | YDR145W           | 0            | 0      | 0             | 0        | 0.071         | 0.814        | 0.9       | 0.109       | 0.981          |
| CHD1   | NGG1  | YER164W           | YDR176W           | 0            | 0      | 0             | 0        | 0             | 0.814        | 0.9       | 0.063       | 0.98           |
| CHD1   | ADA2  | YER164W           | YDR448W           | 0            | 0      | 0             | 0        | 0             | 0.997        | 0.9       | 0           | 0.999          |
| CHD1   | TAF5  | YER164W           | YBR198C           | 0            | 0      | 0             | 0        | 0             | 0.814        | 0.9       | 0.285       | 0.984          |
| CHD1   | SUS1  | YER164W           | YBR111W-A         | 0            | 0      | 0             | 0        | 0             | 0            | 0.9       | 0.283       | 0.923          |
| CHD1   | SPT3  | YER164W           | YDR392W           | 0            | 0      | 0             | 0        | 0             | 0.87         | 0.9       | 0.119       | 0.986          |
| CHD1   | TAF10 | YER164W           | YDR167W           | 0            | 0      | 0             | 0        | 0             | 0.814        | 0.9       | 0.316       | 0.985          |
| GCN5   | SPT7  | YGR252W           | YBR081C           | 0            | 0      | 0             | 0.586    | 0             | 0.999        | 0.9       | 0.874       | 0.999          |
| GCN5   | SPT3  | YGR252W           | YDR392W           | 0            | 0      | 0             | 0        | 0             | 0.999        | 0.948     | 0.951       | 0.999          |
| GCN5   | CHD1  | YGR252W           | YER164W           | 0            | 0      | 0             | 0        | 0             | 0.982        | 0.9       | 0.62        | 0.999          |
| GCN5   | SUS1  | YGR252W           | YBR111W-A         | 0            | 0      | 0             | 0        | 0             | 0.962        | 0.9       | 0.515       | 0.997          |
| GCN5   | SGF29 | YGR252W           | YCL010C           | 0            | 0      | 0             | 0        | 0             | 0.999        | 0.9       | 0.575       | 0.999          |
| GCN5   | TAF10 | YGR252W           | YDR167W           | 0            | 0      | 0             | 0        | 0             | 0.999        | 0.948     | 0.862       | 0.999          |
| GCN5   | TAF6  | YGR252W           | YGL112C           | 0            | 0      | 0             | 0        | 0             | 0.999        | 0.9       | 0.726       | 0.999          |
| GCN5   | SGF73 | YGR252W           | YGL066W           | 0            | 0      | 0             | 0        | 0             | 0.999        | 0.9       | 0.705       | 0.999          |
| GCN5   | TAF5  | YGR252W           | YBR198C           | 0            | 0      | 0             | 0        | 0             | 0.999        | 0.9       | 0.908       | 0.999          |
| GCN5   | TAF12 | YGR252W           | YDR145W           | 0            | 0      | 0             | 0        | 0             | 0.999        | 0.948     | 0.726       | 0.999          |
| GCN5   | ADA2  | YGR252W           | YDR448W           | 0            | 0      | 0             | 0        | 0             | 0.999        | 0.9       | 0.991       | 0.999          |
| GCN5   | NGG1  | YGR252W           | YDR176W           | 0            | 0      | 0             | 0        | 0             | 0.999        | 0.9       | 0.851       | 0.999          |
| HFI1   | SPT8  | YPL254W           | YLR055C           | 0            | 0      | 0             | 0        | 0             | 0.999        | 0.9       | 0.725       | 0.999          |
| HFI1   | CHD1  | YPL254W           | YER164W           | 0            | 0      | 0             | 0        | 0             | 0.814        | 0.9       | 0           | 0.98           |
| HFI1   | TAF12 | YPL254W           | YDR145W           | 0            | 0      | 0             | 0        | 0             | 0.999        | 0.9       | 0.726       | 0.999          |
| HFI1   | SGF11 | YPL254W           | YPL047W           | 0            | 0      | 0             | 0        | 0             | 0.997        | 0.9       | 0.726       | 0.999          |
| HFI1   | SPT20 | YPL254W           | YOL148C           | 0            | 0      | 0             | 0        | 0             | 0.999        | 0.9       | 0.729       | 0.999          |
| HFI1   | SPT7  | YPL254W           | YBR081C           | 0            | 0      | 0             | 0        | 0             | 0.999        | 0.9       | 0.729       | 0.999          |
| HFI1   | GCN5  | YPL254W           | YGR252W           | 0            | 0      | 0             | 0        | 0.146         | 0.999        | 0.9       | 0.781       | 0.999          |
| HFI1   | SUS1  | YPL254W           | YBR111W-A         | 0            | 0      | 0             | 0        | 0             | 0.843        | 0.9       | 0           | 0.983          |
| HFI1   | SPT3  | YPL254W           | YDR392W           | 0            | 0      | 0             | 0        | 0             | 0.999        | 0.9       | 0.773       | 0.999          |
| HFI1   | SGF29 | YPL254W           | YCL010C           | 0            | 0      | 0             | 0        | 0             | 0.999        | 0.9       | 0           | 0.999          |
| HFI1   | TRA1  | YPL254W           | YHR099W           | 0            | 0      | 0             | 0        | 0             | 0.999        | 0.9       | 0.726       | 0.999          |
| HFI1   | SGF73 | YPL254W           | YGL066W           | 0            | 0      | 0             | 0        | 0             | 0.999        | 0.9       | 0           | 0.999          |

|       |       |         |           |   |   |   |       |   |       |     |       |       |
|-------|-------|---------|-----------|---|---|---|-------|---|-------|-----|-------|-------|
| HF11  | NGG1  | YPL254W | YDR176W   | 0 | 0 | 0 | 0     | 0 | 0.999 | 0.9 | 0.774 | 0.999 |
| HF11  | TAF6  | YPL254W | YGL112C   | 0 | 0 | 0 | 0     | 0 | 0.999 | 0.9 | 0.726 | 0.999 |
| HF11  | ADA2  | YPL254W | YDR448W   | 0 | 0 | 0 | 0     | 0 | 0.999 | 0.9 | 0.855 | 0.999 |
| HF11  | TAF9  | YPL254W | YMR236W   | 0 | 0 | 0 | 0     | 0 | 0.999 | 0.9 | 0.726 | 0.999 |
| HF11  | TAF5  | YPL254W | YBR198C   | 0 | 0 | 0 | 0     | 0 | 0.999 | 0.9 | 0.726 | 0.999 |
| HF11  | TAF10 | YPL254W | YDR167W   | 0 | 0 | 0 | 0     | 0 | 0.999 | 0.9 | 0.726 | 0.999 |
| HF11  | UBP8  | YPL254W | YMR223W   | 0 | 0 | 0 | 0     | 0 | 0.999 | 0.9 | 0.726 | 0.999 |
| NGG1  | SPT7  | YDR176W | YBR081C   | 0 | 0 | 0 | 0.458 | 0 | 0.999 | 0.9 | 0.854 | 0.999 |
| NGG1  | TAF10 | YDR176W | YDR167W   | 0 | 0 | 0 | 0     | 0 | 0.999 | 0.9 | 0.772 | 0.999 |
| NGG1  | TAF12 | YDR176W | YDR145W   | 0 | 0 | 0 | 0     | 0 | 0.999 | 0.9 | 0.772 | 0.999 |
| NGG1  | TAF5  | YDR176W | YBR198C   | 0 | 0 | 0 | 0     | 0 | 0.999 | 0.9 | 0.772 | 0.999 |
| NGG1  | SUS1  | YDR176W | YBR111W-A | 0 | 0 | 0 | 0     | 0 | 0.992 | 0.9 | 0.12  | 0.999 |
| NGG1  | SGF29 | YDR176W | YCL010C   | 0 | 0 | 0 | 0     | 0 | 0.999 | 0.9 | 0.402 | 0.999 |
| SGF11 | TAF12 | YPL047W | YDR145W   | 0 | 0 | 0 | 0     | 0 | 0.998 | 0.9 | 0.777 | 0.999 |
| SGF11 | SGF73 | YPL047W | YGL066W   | 0 | 0 | 0 | 0     | 0 | 0.999 | 0.9 | 0.81  | 0.999 |
| SGF11 | SPT8  | YPL047W | YLR055C   | 0 | 0 | 0 | 0     | 0 | 0.998 | 0.9 | 0.776 | 0.999 |
| SGF11 | TAF9  | YPL047W | YMR236W   | 0 | 0 | 0 | 0     | 0 | 0.985 | 0.9 | 0.777 | 0.999 |
| SGF11 | SGF29 | YPL047W | YCL010C   | 0 | 0 | 0 | 0     | 0 | 0.99  | 0.9 | 0.62  | 0.999 |
| SGF11 | TAF6  | YPL047W | YGL112C   | 0 | 0 | 0 | 0     | 0 | 0.999 | 0.9 | 0.777 | 0.999 |
| SGF11 | SPT20 | YPL047W | YOL148C   | 0 | 0 | 0 | 0     | 0 | 0.999 | 0.9 | 0.728 | 0.999 |
| SGF11 | GCN5  | YPL047W | YGR252W   | 0 | 0 | 0 | 0     | 0 | 0.999 | 0.9 | 0.726 | 0.999 |
| SGF11 | ADA2  | YPL047W | YDR448W   | 0 | 0 | 0 | 0     | 0 | 0.999 | 0.9 | 0.728 | 0.999 |
| SGF11 | SPT7  | YPL047W | YBR081C   | 0 | 0 | 0 | 0     | 0 | 0.999 | 0.9 | 0.729 | 0.999 |
| SGF11 | SUS1  | YPL047W | YBR111W-A | 0 | 0 | 0 | 0     | 0 | 0.999 | 0.9 | 0.85  | 0.999 |
| SGF11 | TAF10 | YPL047W | YDR167W   | 0 | 0 | 0 | 0     | 0 | 0.997 | 0.9 | 0.777 | 0.999 |
| SGF11 | TRA1  | YPL047W | YHR099W   | 0 | 0 | 0 | 0     | 0 | 0.996 | 0.9 | 0.777 | 0.999 |
| SGF11 | TAF5  | YPL047W | YBR198C   | 0 | 0 | 0 | 0     | 0 | 0.999 | 0.9 | 0.777 | 0.999 |
| SGF11 | UBP8  | YPL047W | YMR223W   | 0 | 0 | 0 | 0     | 0 | 0.999 | 0.9 | 0.974 | 0.999 |
| SGF11 | SPT3  | YPL047W | YDR392W   | 0 | 0 | 0 | 0     | 0 | 0.989 | 0.9 | 0.771 | 0.999 |
| SGF11 | NGG1  | YPL047W | YDR176W   | 0 | 0 | 0 | 0     | 0 | 0.999 | 0.9 | 0.772 | 0.999 |
| SGF11 | CHD1  | YPL047W | YER164W   | 0 | 0 | 0 | 0     | 0 | 0     | 0.9 | 0.35  | 0.93  |
| SGF29 | SUS1  | YCL010C | YBR111W-A | 0 | 0 | 0 | 0     | 0 | 0.827 | 0.9 | 0.4   | 0.988 |
| SGF29 | SPT7  | YCL010C | YBR081C   | 0 | 0 | 0 | 0     | 0 | 0.999 | 0.9 | 0.62  | 0.999 |
| SGF29 | TAF5  | YCL010C | YBR198C   | 0 | 0 | 0 | 0     | 0 | 0.999 | 0.9 | 0.428 | 0.999 |
| SGF73 | SPT3  | YGL066W | YDR392W   | 0 | 0 | 0 | 0     | 0 | 0.999 | 0.9 | 0.233 | 0.999 |
| SGF73 | SPT7  | YGL066W | YBR081C   | 0 | 0 | 0 | 0     | 0 | 0.999 | 0.9 | 0.74  | 0.999 |
| SGF73 | SUS1  | YGL066W | YBR111W-A | 0 | 0 | 0 | 0     | 0 | 0.999 | 0.9 | 0.702 | 0.999 |
| SGF73 | CHD1  | YGL066W | YER164W   | 0 | 0 | 0 | 0     | 0 | 0     | 0.9 | 0.186 | 0.913 |
| SGF73 | TAF10 | YGL066W | YDR167W   | 0 | 0 | 0 | 0     | 0 | 0.999 | 0.9 | 0.41  | 0.999 |
| SGF73 | TAF5  | YGL066W | YBR198C   | 0 | 0 | 0 | 0     | 0 | 0.999 | 0.9 | 0.512 | 0.999 |
| SGF73 | ADA2  | YGL066W | YDR448W   | 0 | 0 | 0 | 0     | 0 | 0.999 | 0.9 | 0.256 | 0.999 |
| SGF73 | NGG1  | YGL066W | YDR176W   | 0 | 0 | 0 | 0     | 0 | 0.999 | 0.9 | 0.427 | 0.999 |
| SGF73 | SGF29 | YGL066W | YCL010C   | 0 | 0 | 0 | 0     | 0 | 0.999 | 0.9 | 0.81  | 0.999 |
| SGF73 | TAF12 | YGL066W | YDR145W   | 0 | 0 | 0 | 0     | 0 | 0.999 | 0.9 | 0.62  | 0.999 |
| SPT20 | CHD1  | YOL148C | YER164W   | 0 | 0 | 0 | 0     | 0 | 0.814 | 0.9 | 0.46  | 0.988 |
| SPT20 | SPT3  | YOL148C | YDR392W   | 0 | 0 | 0 | 0     | 0 | 0.999 | 0.9 | 0.779 | 0.999 |
| SPT20 | SPT7  | YOL148C | YBR081C   | 0 | 0 | 0 | 0     | 0 | 0.999 | 0.9 | 0.82  | 0.999 |
| SPT20 | SPT8  | YOL148C | YLR055C   | 0 | 0 | 0 | 0     | 0 | 0.999 | 0.9 | 0.812 | 0.999 |
| SPT20 | SGF29 | YOL148C | YCL010C   | 0 | 0 | 0 | 0     | 0 | 0.999 | 0.9 | 0     | 0.999 |
| SPT20 | NGG1  | YOL148C | YDR176W   | 0 | 0 | 0 | 0     | 0 | 0.999 | 0.9 | 0.78  | 0.999 |

|       |       |           |           |   |   |   |   |       |       |       |       |       |
|-------|-------|-----------|-----------|---|---|---|---|-------|-------|-------|-------|-------|
| SPT20 | UBP8  | YOL148C   | YMR223W   | 0 | 0 | 0 | 0 | 0     | 0.999 | 0.9   | 0.728 | 0.999 |
| SPT20 | GCN5  | YOL148C   | YGR252W   | 0 | 0 | 0 | 0 | 0     | 0.999 | 0.9   | 0.808 | 0.999 |
| SPT20 | ADA2  | YOL148C   | YDR448W   | 0 | 0 | 0 | 0 | 0     | 0.999 | 0.9   | 0.772 | 0.999 |
| SPT20 | TAF10 | YOL148C   | YDR167W   | 0 | 0 | 0 | 0 | 0     | 0.999 | 0.9   | 0.728 | 0.999 |
| SPT20 | TRA1  | YOL148C   | YHR099W   | 0 | 0 | 0 | 0 | 0     | 0.999 | 0.9   | 0.728 | 0.999 |
| SPT20 | TAF12 | YOL148C   | YDR145W   | 0 | 0 | 0 | 0 | 0     | 0.999 | 0.9   | 0.728 | 0.999 |
| SPT20 | SGF73 | YOL148C   | YGL066W   | 0 | 0 | 0 | 0 | 0     | 0.999 | 0.9   | 0     | 0.999 |
| SPT20 | TAF6  | YOL148C   | YGL112C   | 0 | 0 | 0 | 0 | 0     | 0.999 | 0.9   | 0.728 | 0.999 |
| SPT20 | TAF9  | YOL148C   | YMR236W   | 0 | 0 | 0 | 0 | 0     | 0.999 | 0.9   | 0.728 | 0.999 |
| SPT20 | TAF5  | YOL148C   | YBR198C   | 0 | 0 | 0 | 0 | 0     | 0.999 | 0.9   | 0.728 | 0.999 |
| SPT20 | SUS1  | YOL148C   | YBR111W-A | 0 | 0 | 0 | 0 | 0     | 0.963 | 0.9   | 0.23  | 0.996 |
| SPT3  | NGG1  | YDR392W   | YDR176W   | 0 | 0 | 0 | 0 | 0     | 0.999 | 0.9   | 0.78  | 0.999 |
| SPT3  | SGF29 | YDR392W   | YCL010C   | 0 | 0 | 0 | 0 | 0     | 0.998 | 0.9   | 0.269 | 0.999 |
| SPT3  | TAF5  | YDR392W   | YBR198C   | 0 | 0 | 0 | 0 | 0     | 0.999 | 0.9   | 0.771 | 0.999 |
| SPT3  | TAF10 | YDR392W   | YDR167W   | 0 | 0 | 0 | 0 | 0     | 0.999 | 0.948 | 0.771 | 0.999 |
| SPT3  | TAF12 | YDR392W   | YDR145W   | 0 | 0 | 0 | 0 | 0     | 0.999 | 0.948 | 0.771 | 0.999 |
| SPT3  | SPT7  | YDR392W   | YBR081C   | 0 | 0 | 0 | 0 | 0     | 0.999 | 0.948 | 0.78  | 0.999 |
| SPT3  | SUS1  | YDR392W   | YBR111W-A | 0 | 0 | 0 | 0 | 0     | 0.81  | 0.9   | 0     | 0.979 |
| SPT8  | TAF6  | YLR055C   | YGL112C   | 0 | 0 | 0 | 0 | 0     | 0.999 | 0.9   | 0.776 | 0.999 |
| SPT8  | TAF5  | YLR055C   | YBR198C   | 0 | 0 | 0 | 0 | 0     | 0.999 | 0.9   | 0.808 | 0.999 |
| SPT8  | TAF10 | YLR055C   | YDR167W   | 0 | 0 | 0 | 0 | 0     | 0.999 | 0.9   | 0.776 | 0.999 |
| SPT8  | NGG1  | YLR055C   | YDR176W   | 0 | 0 | 0 | 0 | 0     | 0.999 | 0.9   | 0.771 | 0.999 |
| SPT8  | GCN5  | YLR055C   | YGR252W   | 0 | 0 | 0 | 0 | 0     | 0.999 | 0.9   | 0.81  | 0.999 |
| SPT8  | SPT3  | YLR055C   | YDR392W   | 0 | 0 | 0 | 0 | 0     | 0.999 | 0.9   | 0.73  | 0.999 |
| SPT8  | TRA1  | YLR055C   | YHR099W   | 0 | 0 | 0 | 0 | 0     | 0.999 | 0.9   | 0.776 | 0.999 |
| SPT8  | SGF73 | YLR055C   | YGL066W   | 0 | 0 | 0 | 0 | 0     | 0.999 | 0.9   | 0.651 | 0.999 |
| SPT8  | TAF12 | YLR055C   | YDR145W   | 0 | 0 | 0 | 0 | 0     | 0.999 | 0.9   | 0.776 | 0.999 |
| SPT8  | SUS1  | YLR055C   | YBR111W-A | 0 | 0 | 0 | 0 | 0     | 0.982 | 0.9   | 0.48  | 0.998 |
| SPT8  | ADA2  | YLR055C   | YDR448W   | 0 | 0 | 0 | 0 | 0     | 0.999 | 0.9   | 0.728 | 0.999 |
| SPT8  | SPT7  | YLR055C   | YBR081C   | 0 | 0 | 0 | 0 | 0     | 0.999 | 0.9   | 0.921 | 0.999 |
| SPT8  | CHD1  | YLR055C   | YER164W   | 0 | 0 | 0 | 0 | 0     | 0.361 | 0.9   | 0.482 | 0.962 |
| SPT8  | SGF29 | YLR055C   | YCL010C   | 0 | 0 | 0 | 0 | 0     | 0.999 | 0.9   | 0.652 | 0.999 |
| SUS1  | SPT7  | YBR111W-A | YBR081C   | 0 | 0 | 0 | 0 | 0     | 0.999 | 0.9   | 0.576 | 0.999 |
| TAF10 | TAF5  | YDR167W   | YBR198C   | 0 | 0 | 0 | 0 | 0     | 0.999 | 0.948 | 0.92  | 0.999 |
| TAF10 | SGF29 | YDR167W   | YCL010C   | 0 | 0 | 0 | 0 | 0     | 0.999 | 0.9   | 0.35  | 0.999 |
| TAF10 | SUS1  | YDR167W   | YBR111W-A | 0 | 0 | 0 | 0 | 0     | 0.81  | 0.9   | 0.087 | 0.98  |
| TAF10 | SPT7  | YDR167W   | YBR081C   | 0 | 0 | 0 | 0 | 0     | 0.999 | 0.948 | 0.959 | 0.999 |
| TAF10 | TAF12 | YDR167W   | YDR145W   | 0 | 0 | 0 | 0 | 0     | 0.999 | 0.948 | 0.879 | 0.999 |
| TAF12 | SUS1  | YDR145W   | YBR111W-A | 0 | 0 | 0 | 0 | 0     | 0.992 | 0.9   | 0.362 | 0.999 |
| TAF12 | TAF5  | YDR145W   | YBR198C   | 0 | 0 | 0 | 0 | 0     | 0.999 | 0.948 | 0.879 | 0.999 |
| TAF12 | SPT7  | YDR145W   | YBR081C   | 0 | 0 | 0 | 0 | 0     | 0.999 | 0.948 | 0.742 | 0.999 |
| TAF12 | SGF29 | YDR145W   | YCL010C   | 0 | 0 | 0 | 0 | 0     | 0.999 | 0.9   | 0.53  | 0.999 |
| TAF5  | SUS1  | YBR198C   | YBR111W-A | 0 | 0 | 0 | 0 | 0     | 0.81  | 0.9   | 0.233 | 0.983 |
| TAF5  | SPT7  | YBR198C   | YBR081C   | 0 | 0 | 0 | 0 | 0.071 | 0.999 | 0.9   | 0.874 | 0.999 |
| TAF6  | CHD1  | YGL112C   | YER164W   | 0 | 0 | 0 | 0 | 0     | 0.814 | 0.9   | 0.102 | 0.98  |
| TAF6  | SGF29 | YGL112C   | YCL010C   | 0 | 0 | 0 | 0 | 0     | 0.999 | 0.9   | 0.092 | 0.999 |
| TAF6  | TAF5  | YGL112C   | YBR198C   | 0 | 0 | 0 | 0 | 0     | 0.999 | 0.948 | 0.872 | 0.999 |
| TAF6  | SPT7  | YGL112C   | YBR081C   | 0 | 0 | 0 | 0 | 0     | 0.999 | 0.9   | 0.729 | 0.999 |
| TAF6  | TAF10 | YGL112C   | YDR167W   | 0 | 0 | 0 | 0 | 0     | 0.999 | 0.948 | 0.81  | 0.999 |
| TAF6  | SUS1  | YGL112C   | YBR111W-A | 0 | 0 | 0 | 0 | 0     | 0.992 | 0.9   | 0     | 0.999 |

|      |       |         |           |   |   |   |   |       |       |       |       |       |
|------|-------|---------|-----------|---|---|---|---|-------|-------|-------|-------|-------|
| TAF6 | SPT3  | YGL112C | YDR392W   | 0 | 0 | 0 | 0 | 0     | 0.999 | 0.9   | 0.771 | 0.999 |
| TAF6 | ADA2  | YGL112C | YDR448W   | 0 | 0 | 0 | 0 | 0     | 0.999 | 0.9   | 0.728 | 0.999 |
| TAF6 | SGF73 | YGL112C | YGL066W   | 0 | 0 | 0 | 0 | 0     | 0.999 | 0.9   | 0.069 | 0.999 |
| TAF6 | TAF12 | YGL112C | YDR145W   | 0 | 0 | 0 | 0 | 0     | 0.999 | 0.948 | 0.777 | 0.999 |
| TAF6 | NGG1  | YGL112C | YDR176W   | 0 | 0 | 0 | 0 | 0     | 0.999 | 0.9   | 0.772 | 0.999 |
| TAF9 | TRA1  | YMR236W | YHR099W   | 0 | 0 | 0 | 0 | 0     | 0.999 | 0.948 | 0.777 | 0.999 |
| TAF9 | TAF10 | YMR236W | YDR167W   | 0 | 0 | 0 | 0 | 0     | 0.999 | 0.948 | 0.81  | 0.999 |
| TAF9 | SGF29 | YMR236W | YCL010C   | 0 | 0 | 0 | 0 | 0     | 0.999 | 0.9   | 0     | 0.999 |
| TAF9 | CHD1  | YMR236W | YER164W   | 0 | 0 | 0 | 0 | 0     | 0.814 | 0.9   | 0     | 0.98  |
| TAF9 | UBP8  | YMR236W | YMR223W   | 0 | 0 | 0 | 0 | 0     | 0.999 | 0.9   | 0.777 | 0.999 |
| TAF9 | NGG1  | YMR236W | YDR176W   | 0 | 0 | 0 | 0 | 0     | 0.999 | 0.9   | 0.772 | 0.999 |
| TAF9 | SPT8  | YMR236W | YLR055C   | 0 | 0 | 0 | 0 | 0     | 0.999 | 0.9   | 0.776 | 0.999 |
| TAF9 | SUS1  | YMR236W | YBR111W-A | 0 | 0 | 0 | 0 | 0     | 0.81  | 0.9   | 0     | 0.979 |
| TAF9 | ADA2  | YMR236W | YDR448W   | 0 | 0 | 0 | 0 | 0     | 0.999 | 0.948 | 0.854 | 0.999 |
| TAF9 | SGF73 | YMR236W | YGL066W   | 0 | 0 | 0 | 0 | 0     | 0.999 | 0.9   | 0.093 | 0.999 |
| TAF9 | SPT7  | YMR236W | YBR081C   | 0 | 0 | 0 | 0 | 0     | 0.999 | 0.948 | 0.729 | 0.999 |
| TAF9 | SPT3  | YMR236W | YDR392W   | 0 | 0 | 0 | 0 | 0     | 0.999 | 0.948 | 0.771 | 0.999 |
| TAF9 | TAF6  | YMR236W | YGL112C   | 0 | 0 | 0 | 0 | 0     | 0.999 | 0.948 | 0.898 | 0.999 |
| TAF9 | GCN5  | YMR236W | YGR252W   | 0 | 0 | 0 | 0 | 0     | 0.999 | 0.948 | 0.726 | 0.999 |
| TAF9 | TAF5  | YMR236W | YBR198C   | 0 | 0 | 0 | 0 | 0     | 0.999 | 0.948 | 0.81  | 0.999 |
| TAF9 | TAF12 | YMR236W | YDR145W   | 0 | 0 | 0 | 0 | 0     | 0.999 | 0.948 | 0.79  | 0.999 |
| TRA1 | SGF29 | YHR099W | YCL010C   | 0 | 0 | 0 | 0 | 0     | 0.999 | 0.9   | 0.257 | 0.999 |
| TRA1 | SPT3  | YHR099W | YDR392W   | 0 | 0 | 0 | 0 | 0     | 0.999 | 0.948 | 0.771 | 0.999 |
| TRA1 | GCN5  | YHR099W | YGR252W   | 0 | 0 | 0 | 0 | 0     | 0.999 | 0.948 | 0.726 | 0.999 |
| TRA1 | SUS1  | YHR099W | YBR111W-A | 0 | 0 | 0 | 0 | 0     | 0.999 | 0.9   | 0.401 | 0.999 |
| TRA1 | TAF6  | YHR099W | YGL112C   | 0 | 0 | 0 | 0 | 0     | 0.999 | 0.9   | 0.777 | 0.999 |
| TRA1 | CHD1  | YHR099W | YER164W   | 0 | 0 | 0 | 0 | 0.109 | 0.814 | 0.9   | 0.1   | 0.981 |
| TRA1 | ADA2  | YHR099W | YDR448W   | 0 | 0 | 0 | 0 | 0     | 0.999 | 0.9   | 0.728 | 0.999 |
| TRA1 | TAF5  | YHR099W | YBR198C   | 0 | 0 | 0 | 0 | 0     | 0.999 | 0.9   | 0.777 | 0.999 |
| TRA1 | SGF73 | YHR099W | YGL066W   | 0 | 0 | 0 | 0 | 0     | 0.999 | 0.9   | 0.187 | 0.999 |
| TRA1 | TAF10 | YHR099W | YDR167W   | 0 | 0 | 0 | 0 | 0     | 0.999 | 0.948 | 0.777 | 0.999 |
| TRA1 | SPT7  | YHR099W | YBR081C   | 0 | 0 | 0 | 0 | 0     | 0.999 | 0.948 | 0.729 | 0.999 |
| TRA1 | TAF12 | YHR099W | YDR145W   | 0 | 0 | 0 | 0 | 0     | 0.999 | 0.948 | 0.777 | 0.999 |
| TRA1 | NGG1  | YHR099W | YDR176W   | 0 | 0 | 0 | 0 | 0     | 0.999 | 0.9   | 0.772 | 0.999 |
| UBP8 | TRA1  | YMR223W | YHR099W   | 0 | 0 | 0 | 0 | 0     | 0.998 | 0.9   | 0.777 | 0.999 |
| UBP8 | TAF12 | YMR223W | YDR145W   | 0 | 0 | 0 | 0 | 0     | 0.999 | 0.9   | 0.777 | 0.999 |
| UBP8 | TAF5  | YMR223W | YBR198C   | 0 | 0 | 0 | 0 | 0     | 0.999 | 0.9   | 0.777 | 0.999 |
| UBP8 | CHD1  | YMR223W | YER164W   | 0 | 0 | 0 | 0 | 0     | 0.814 | 0.9   | 0.522 | 0.989 |
| UBP8 | NGG1  | YMR223W | YDR176W   | 0 | 0 | 0 | 0 | 0     | 0.999 | 0.9   | 0.772 | 0.999 |
| UBP8 | GCN5  | YMR223W | YGR252W   | 0 | 0 | 0 | 0 | 0     | 0.999 | 0.9   | 0.741 | 0.999 |
| UBP8 | SUS1  | YMR223W | YBR111W-A | 0 | 0 | 0 | 0 | 0     | 0.999 | 0.9   | 0.747 | 0.999 |
| UBP8 | ADA2  | YMR223W | YDR448W   | 0 | 0 | 0 | 0 | 0     | 0.999 | 0.9   | 0.728 | 0.999 |
| UBP8 | SPT3  | YMR223W | YDR392W   | 0 | 0 | 0 | 0 | 0     | 0.999 | 0.9   | 0.771 | 0.999 |
| UBP8 | SPT8  | YMR223W | YLR055C   | 0 | 0 | 0 | 0 | 0     | 0.999 | 0.9   | 0.776 | 0.999 |
| UBP8 | TAF10 | YMR223W | YDR167W   | 0 | 0 | 0 | 0 | 0     | 0.999 | 0.9   | 0.777 | 0.999 |
| UBP8 | SGF73 | YMR223W | YGL066W   | 0 | 0 | 0 | 0 | 0     | 0.999 | 0.9   | 0.81  | 0.999 |
| UBP8 | SGF29 | YMR223W | YCL010C   | 0 | 0 | 0 | 0 | 0     | 0.999 | 0.9   | 0.653 | 0.999 |
| UBP8 | TAF6  | YMR223W | YGL112C   | 0 | 0 | 0 | 0 | 0     | 0.999 | 0.9   | 0.777 | 0.999 |
| UBP8 | SPT7  | YMR223W | YBR081C   | 0 | 0 | 0 | 0 | 0     | 0.999 | 0.9   | 0.741 | 0.999 |
