# Supplementary material for: Spt-Ada-Gcn5-Acetyltransferase (SAGA) Complex in Plants: Genome Wide Identification, Evolutionary Conservation and Functional Determination
Source: PubMed Central journal article supplement (PMC4532415; doi:10.1371/journal.pone.0134709), 2015-08-11
Supplement: pone.0134709.s014.pdf [file pone.0134709.s014.pdf]

**S7 Table:** MPSS data for *Arabidopsis* SAGA complex encoding genes showing different tissue-specific abundance.

| LOCUS                   | Signature | CAF | INF | LEF | ROF | SIF | AP1 | AP3 | AGM | INS | ROS | SAP | LES | GSE | CAS | SIS |
|-------------------------|-----------|-----|-----|-----|-----|-----|-----|-----|-----|-----|-----|-----|-----|-----|-----|-----|
| At1g02680<br>Spt3       | 20        | 35  | 41  | 45  | 38  | 46  | 34  | 46  | 12  | 32  | 4   | 14  | 17  | 9   | 24  | 64  |
|                         | 17        | 31  | 37  | 39  | 34  | 40  | 38  | 41  | 10  | 26  | 17  | 12  | 17  | 11  | 20  | 50  |
| At1g04950<br>Taf6       | 20        | 34  | 142 | 48  | 24  | 128 | 40  | 50  | 14  | 0   | 6   | 0   | 28  | 0   | 28  | 62  |
|                         | 17        | 34  | 116 | 46  | 30  | 112 | 37  | 47  | 12  | 0   | 6   | 0   | 26  | 0   | 26  | 52  |
| At1g17440<br>Taf12b     | 20        | 56  | 34  | 39  | 11  | 17  | 42  | 57  | 41  | 36  | 15  | 9   | 35  | 49  | 80  | 16  |
|                         | 17        | 47  | 28  | 35  | 9   | 15  | 36  | 50  | 35  | 32  | 15  | 9   | 33  | 43  | 67  | 15  |
| At1g32750<br>Haf01/Spt7 | 20        | 143 | 82  | 68  | 140 | 79  | 72  | 121 | 197 | 138 | 82  | 172 | 82  | 4   | 37  | 63  |
|                         | 17        | 121 | 76  | 59  | 120 | 70  | 64  | 105 | 171 | 122 | 71  | 153 | 77  | 2   | 30  | 71  |
| At1g54140<br>Taf9       | 20        | 48  | 106 | 47  | 90  | 172 | 34  | 25  | 5   | 28  | 5   | 23  | 7   | 1   | 30  | 0   |
|                         | 17        | 41  | 96  | 44  | 88  | 159 | 30  | 21  | 5   | 26  | 5   | 20  | 7   | 3   | 42  | 4   |
| At1g54360<br>Taf6b      | 20        | 0   | 0   | 0   | 0   | 0   | 17  | 16  | 7   | 6   | 36  | 12  | 6   | 0   | 98  | 27  |
|                         | 17        | 0   | 0   | 0   | 0   | 0   | 15  | 19  | 6   | 6   | 35  | 11  | 6   | 0   | 82  | 37  |
| At1g72390<br>Spt20      | 20        | 24  | 154 | 68  | 27  | 39  | 14  | 6   | 12  | 41  | 4   | 18  | 22  | 0   | 14  | 2   |
|                         | 17        | 26  | 166 | 67  | 39  | 45  | 12  | 6   | 10  | 36  | 4   | 26  | 20  | 0   | 19  | 3   |
| At2g13370<br>Chr5       | 20        | 0   | 0   | 0   | 9   | 3   | 43  | 42  | 46  | 83  | 58  | 27  | 100 | 18  | 20  | 58  |
|                         | 17        | 0   | 2   | 4   | 10  | 4   | 41  | 35  | 46  | 82  | 54  | 28  | 95  | 11  | 30  | 56  |
| At2g14850<br>Ada1a      | 20        | 74  | 54  | 28  | 17  | 49  | 19  | 9   | 11  | 23  | 49  | 32  | 0   | 0   | 50  | 0   |
|                         | 17        | 64  | 48  | 24  | 14  | 48  | 17  | 9   | 10  | 20  | 44  | 30  | 0   | 0   | 39  | 0   |
| At2g17930<br>Tra1a      | 20        | 4   | 0   | 0   | 0   | 0   | 23  | 30  | 0   | 13  | 10  | 4   | 14  | 24  | 0   | 0   |
|                         | 17        | 4   | 0   | 0   | 0   | 0   | 19  | 24  | 0   | 14  | 9   | 6   | 22  | 18  | 0   | 0   |
| At3g10070<br>Taf12      | 20        | 0   | 4   | 16  | 0   | 0   | 0   | 0   | 0   | 0   | 0   | 6   | 0   | 4   | 8   | 0   |
|                         | 17        | 0   | 4   | 16  | 0   | 0   | 0   | 0   | 0   | 0   | 0   | 4   | 0   | 0   | 8   | 0   |
| At3g27100<br>Eny2/Sus1  | 20        | 13  | 14  | 15  | 20  | 21  | 11  | 28  | 20  | 16  | 150 | 20  | 46  | 44  | 53  | 21  |
|                         | 17        | 11  | 13  | 13  | 17  | 19  | 11  | 26  | 19  | 16  | 140 | 17  | 43  | 36  | 43  | 22  |
| At3g27460<br>Sgf29a     | 20        | 3   | 2   | 0   | 3   | 0   | 4   | 1   | 0   | 0   | 0   | 0   | 3   | 0   | 0   | 4   |
|                         | 17        | 8   | 10  | 0   | 4   | 3   | 9   | 3   | 10  | 0   | 6   | 0   | 5   | 0   | 0   | 3   |
| At3g54610<br>GCN5       | 20        | 48  | 0   | 0   | 0   | 24  | 0   | 5   | 0   | 0   | 0   | 0   | 0   | 0   | 0   | 0   |
|                         | 17        | 54  | 0   | 0   | 0   | 38  | 0   | 4   | 0   | 0   | 0   | 0   | 0   | 0   | 0   | 0   |
| At4g16420<br>Ada2b      | 20        | 105 | 29  | 62  | 9   | 14  | 11  | 9   | 11  | 14  | 0   | 10  | 92  | 2   | 10  | 45  |
|                         | 17        | 106 | 56  | 97  | 20  | 15  | 26  | 11  | 12  | 13  | 0   | 10  | 180 | 25  | 26  | 113 |
| At4g29790<br>Ada3       | 20        | 23  | 0   | 15  | 0   | 0   | 11  | 6   | 0   | 7   | 33  | 12  | 0   | 7   | 0   | 17  |
|                         | 17        | 4   | 0   | 0   | 0   | 0   | 0   | 0   | 0   | 0   | 0   | 0   | 0   | 1   | 0   | 0   |
| At4g31720<br>Taf10      | 20        | 134 | 184 | 232 | 306 | 260 | 88  | 167 | 48  | 127 | 560 | 59  | 74  | 5   | 312 | 194 |
|                         | 17        | 116 | 156 | 207 | 268 | 226 | 74  | 141 | 43  | 112 | 486 | 61  | 66  | 5   | 258 | 178 |
| At4g36080<br>Tra1b      | 20        | 0   | 0   | 0   | 0   | 0   | 5   | 12  | 4   | 6   | 4   | 0   | 20  | 4   | 0   | 31  |
|                         | 17        | 0   | 0   | 0   | 0   | 0   | 10  | 12  | 4   | 13  | 4   | 0   | 20  | 3   | 0   | 40  |
| At5g10790<br>Ubp22      | 20        | 13  | 0   | 8   | 11  | 4   | 0   | 2   | 0   | 0   | 1   | 0   | 16  | 41  | 16  | 0   |
|                         | 17        | 14  | 4   | 10  | 20  | 10  | 0   | 0   | 0   | 5   | 15  | 0   | 14  | 10  | 30  | 0   |
| At5g25150<br>Taf5       | 20        | 194 | 94  | 28  | 44  | 56  | 16  | 64  | 60  | 54  | 71  | 20  | 0   | 0   | 0   | 4   |
|                         | 17        | 174 | 102 | 38  | 36  | 58  | 20  | 68  | 68  | 60  | 83  | 20  | 0   | 4   | 0   | 6   |
| At5g40550<br>Sgf29b     | 20        | 10  | 8   | 12  | 26  | 38  | 14  | 22  | 14  | 16  | 4   | 5   | 0   | 0   | 0   | 4   |
|                         | 17        | 8   | 8   | 12  | 22  | 30  | 12  | 18  | 22  | 14  | 0   | 9   | 0   | 2   | 0   | 2   |
| At5g58575<br>Sgf11      | 20        | 29  | 10  | 16  | 19  | 37  | 19  | 20  | 18  | 17  | 40  | 5   | 26  | 0   | 18  | 0   |
|                         | 17        | 29  | 10  | 14  | 18  | 36  | 17  | 19  | 15  | 15  | 33  | 5   | 27  | 4   | 44  | 19  |
| At5g67410<br>Ada1b      | 20        | 10  | 0   | 3   | 1   | 14  | 0   | 0   | 0   | 0   | 5   | 29  | 0   | 0   | 11  | 2   |
|                         | 17        | 9   | 0   | 2   | 1   | 12  | 0   | 0   | 0   | 0   | 6   | 25  | 1   | 14  | 13  | 3   |

|     |                                                           |     |                                                          |
|-----|-----------------------------------------------------------|-----|----------------------------------------------------------|
| CAF | Callus - actively growing, classic MPSS,                  | INF | Inflorescence - mixed stage, immature buds, classic MPSS |
| LEF | Leaves - 21 day, untreated, classic MPSS,                 | ROF | Root - 21 day, untreated, classic MPSS                   |
| SIF | Silique - 24 to 48 hr post-fertilization, classic MPSS,   | AP1 | ap1-10 inflorescence - mixed stage, immature buds        |
| AP3 | ap3-6 inflorescence - mixed stage, immature buds,         | AGM | agamous inflorescence - mixed stage, immature buds       |
| INS | Inflorescence - mixed stage, immature buds,               | ROS | Root - 21 day, untreated                                 |
| SAP | sup/ap1 inflorescence - mixed stage, immature buds        | LES | Leaves - 21 day, untreated                               |
| GSE | Germinating seedlings,                                    | CAS | Callus - actively growing, signature MPSS                |
| SIS | Siliques - 24 to 48 hr post-fertilization, signature MPSS |     |                                                          |
