# Supplementary material for: Spt-Ada-Gcn5-Acetyltransferase (SAGA) Complex in Plants: Genome Wide Identification, Evolutionary Conservation and Functional Determination
Source: PubMed Central journal article supplement (PMC4532415; doi:10.1371/journal.pone.0134709), 2015-08-11
Supplement: pone.0134709.s015.pdf [file pone.0134709.s015.pdf]

**S8 Table:** MPSS data for *O. sativa* SAGA complex encoding genes showing different tissue-specific abundance.

| LOCUS                        | Signature | NYR                                                              | NRA | NRB | NGD | NST | NYL | NLA | NLB  | NLC | NLD | NME | NPO | NOS  | NIP | NGS | NCA |
|------------------------------|-----------|------------------------------------------------------------------|-----|-----|-----|-----|-----|-----|------|-----|-----|-----|-----|------|-----|-----|-----|
| LOC_Os01g02860<br>Spt20      | 20        | 0                                                                | 0   | 0   | 3   | 0   | 0   | 0   | 0    | 0   | 0   | 12  | 0   | 0    | 0   | 0   | 0   |
|                              | 17        | 0                                                                | 0   | 0   | 2   | 0   | 0   | 0   | 0    | 0   | 0   | 10  | 0   | 0    | 0   | 0   | 0   |
| LOC_Os01g23630<br>TAF13/Spt3 | 20        | 69                                                               | 69  | 9   | 0   | 0   | 45  | 18  | 2    | 0   | 2   | 29  | 84  | 182  | 67  | 78  | 121 |
|                              | 17        | 82                                                               | 56  | 10  | 66  | 32  | 33  | 18  | 0    | 28  | 10  | 28  | 70  | 198  | 73  | 106 | 82  |
| LOC_Os01g32750<br>Taf6       | 20        | 0                                                                | 0   | 53  | 0   | 16  | 54  | 0   | 0    | 0   | 0   | 0   | 0   | 5    | 0   | 0   | 7   |
|                              | 17        | 0                                                                | 0   | 44  | 0   | 40  | 46  | 0   | 29   | 0   | 2   | 0   | 0   | 24   | 0   | 0   | 26  |
| LOC_Os01g62820<br>Taf12b     | 20        | 0                                                                | 3   | 0   | 0   | 0   | 64  | 0   | 0    | 0   | 0   | 0   | 0   | 0    | 0   | 0   | 0   |
|                              | 17        | 0                                                                | 3   | 0   | 0   | 0   | 77  | 0   | 0    | 0   | 0   | 3   | 0   | 27   | 0   | 0   | 3   |
| LOC_Os01g63940<br>Taf12b     | 20        | 0                                                                | 0   | 0   | 0   | 0   | 0   | 0   | 0    | 0   | 7   | 0   | 0   | 0    | 0   | 0   | 24  |
|                              | 17        | 0                                                                | 0   | 0   | 0   | 0   | 0   | 0   | 0    | 0   | 0   | 0   | 0   | 0    | 0   | 0   | 19  |
| LOC_Os01g69110<br>Sus1       | 20        | 0                                                                | 45  | 0   | 6   | 45  | 43  | 12  | 0    | 0   | 0   | 33  | 0   | 4    | 23  | 0   | 0   |
|                              | 17        | 2                                                                | 44  | 0   | 12  | 31  | 32  | 8   | 5    | 0   | 0   | 25  | 0   | 4    | 49  | 3   | 21  |
| LOC_Os03g29470<br>Taf9       | 20        | 0                                                                | 17  | 0   | 0   | 0   | 0   | 0   | 0    | 4   | 34  | 0   | 0   | 0    | 0   | 4   | 0   |
|                              | 17        | 2                                                                | 40  | 19  | 0   | 0   | 41  | 0   | 7    | 3   | 43  | 0   | 0   | 64   | 18  | 3   | 64  |
| LOC_Os03g53960<br>Ada2b      | 20        | 196                                                              | 70  | 186 | 38  | 46  | 126 | 46  | 309  | 249 | 262 | 64  | 29  | 80   | 178 | 124 | 155 |
|                              | 17        | 166                                                              | 70  | 173 | 38  | 78  | 142 | 78  | 277  | 204 | 228 | 57  | 30  | 71   | 162 | 136 | 127 |
| LOC_Os03g55450<br>Ada1b      | 20        | 9                                                                | 0   | 82  | 0   | 6   | 0   | 24  | 198  | 141 | 133 | 56  | 49  | 73   | 156 | 0   | 36  |
|                              | 17        | 21                                                               | 23  | 64  | 22  | 9   | 21  | 39  | 162  | 115 | 108 | 60  | 44  | 64   | 135 | 14  | 59  |
| LOC_Os04g55360<br>Ubp22      | 20        | 0                                                                | 0   | 0   | 0   | 0   | 3   | 0   | 0    | 0   | 5   | 0   | 6   | 0    | 28  | 4   | 0   |
|                              | 17        | 0                                                                | 11  | 0   | 0   | 0   | 2   | 0   | 0    | 0   | 3   | 0   | 7   | 10   | 37  | 9   | 0   |
| LOC_Os05g28300<br>Ada3       | 20        | 0                                                                | 20  | 0   | 0   | 25  | 0   | 0   | 0    | 14  | 0   | 21  | 0   | 0    | 0   | 0   | 0   |
|                              | 17        | 9                                                                | 36  | 3   | 0   | 26  | 21  | 0   | 1    | 11  | 0   | 20  | 48  | 6    | 43  | 0   | 0   |
| LOC_Os05g28370<br>Sgf11      | 20        | There are no expressed signatures associated with LOC_Os05g28370 |     |     |     |     |     |     |      |     |     |     |     |      |     |     |     |
|                              | 17        | 0                                                                | 0   | 0   | 0   | 0   | 0   | 0   | 0    | 0   | 0   | 0   | 0   | 0    | 0   | 0   | 0   |
| LOC_Os06g43790<br>Haf01/Spt7 | 20        | 0                                                                | 98  | 145 | 0   | 0   | 31  | 9   | 279  | 86  | 175 | 95  | 85  | 176  | 23  | 36  | 43  |
|                              | 17        | 0                                                                | 81  | 150 | 0   | 0   | 25  | 7   | 208  | 66  | 134 | 91  | 73  | 134  | 18  | 43  | 53  |
| LOC_Os06g44030<br>Taf5       | 20        | 3                                                                | 5   | 28  | 0   | 22  | 24  | 42  | 22   | 15  | 0   | 57  | 0   | 87   | 17  | 0   | 68  |
|                              | 17        | 5                                                                | 4   | 19  | 0   | 15  | 3   | 0   | 0    | 0   | 0   | 0   | 0   | 17   | 0   | 0   | 0   |
| LOC_Os07g42150<br>Taf9b      | 20        | 0                                                                | 0   | 0   | 0   | 0   | 0   | 0   | 0    | 0   | 0   | 0   | 0   | 0    | 0   | 0   | 0   |
|                              | 17        | 0                                                                | 0   | 0   | 0   | 0   | 0   | 0   | 0    | 0   | 0   | 0   | 0   | 0    | 0   | 0   | 0   |
| LOC_Os07g45064<br>Tra1       | 20        | 297                                                              | 560 | 374 | 339 | 198 | 348 | 511 | 1131 | 424 | 525 | 785 | 228 | 2295 | 364 | 163 | 452 |
|                              | 17        | 218                                                              | 440 | 297 | 499 | 148 | 275 | 393 | 865  | 329 | 419 | 627 | 188 | 1732 | 290 | 121 | 365 |
| LOC_Os09g26180<br>Taf10      | 20        | 75                                                               | 90  | 119 | 57  | 242 | 293 | 274 | 142  | 226 | 38  | 158 | 78  | 316  | 219 | 55  | 322 |
|                              | 17        | 68                                                               | 87  | 98  | 92  | 184 | 236 | 214 | 119  | 211 | 48  | 134 | 127 | 262  | 184 | 45  | 267 |
| LOC_Os10g28040<br>Gcn5       | 20        | 0                                                                | 0   | 0   | 0   | 0   | 0   | 0   | 0    | 0   | 0   | 0   | 0   | 0    | 0   | 0   | 0   |
|                              | 17        | 0                                                                | 0   | 0   | 0   | 0   | 0   | 0   | 0    | 0   | 0   | 0   | 0   | 0    | 0   | 0   | 0   |
| LOC_Os12g19350<br>Sgf29      | 20        | 23                                                               | 0   | 149 | 0   | 1   | 8   | 9   | 0    | 0   | 2   | 0   | 18  | 62   | 0   | 9   | 11  |
|                              | 17        | 19                                                               | 0   | 121 | 1   | 0   | 6   | 18  | 0    | 0   | 2   | 0   | 21  | 51   | 0   | 25  | 31  |
| LOC_Os12g39090<br>Ada1a      | 20        | 0                                                                | 0   | 17  | 0   | 0   | 0   | 0   | 0    | 0   | 0   | 0   | 0   | 15   | 0   | 0   | 0   |
|                              | 17        | 0                                                                | 0   | 18  | 4   | 0   | 1   | 0   | 0    | 0   | 0   | 2   | 2   | 12   | 0   | 0   | 0   |

|     |                                                |     |                                               |
|-----|------------------------------------------------|-----|-----------------------------------------------|
| NYR | 14 days - Young Roots,                         | NRA | 60 days - Mature Roots - Replicate A          |
| NRB | 60 days - Mature Roots - Replicate B,          | NGD | 10 days - Germinating seedlings grown in dark |
| NST | 60 days - Stem,                                | NYL | 14 days - Young leaves                        |
| NLA | 60 days - Mature Leaves - Replicate A ,        | NLB | 60 days - Mature Leaves - Replicate B         |
| NLC | 60 days - Mature Leaves - Replicate C,         | NLD | 60 days - Mature Leaves - Replicate D         |
| NME | 60 days - Crown vegetative meristematic tissue | NPO | Mature Pollen,                                |
| NOS | Ovary and mature stigma                        | NIP | 90 days - Immature panicle,                   |
| NGS | 3 days - Germinating seed                      | NCA | 35 days - Callus                              |
