# Supplementary material for: Spt-Ada-Gcn5-Acetyltransferase (SAGA) Complex in Plants: Genome Wide Identification, Evolutionary Conservation and Functional Determination
Source: PubMed Central journal article supplement (PMC4532415; doi:10.1371/journal.pone.0134709), 2015-08-11
Supplement: pone.0134709.s016.pdf [file pone.0134709.s016.pdf]

**S9 Table:** List of co-expression genes in *Arabidopsis*.

| S.No. | Locus1    |        | Locus2    |        | MR<br>(All) | MR<br>(Tissue) | MR<br>(Abiotic) | MR<br>(Biotic) | MR<br>(Hormone) |
|-------|-----------|--------|-----------|--------|-------------|----------------|-----------------|----------------|-----------------|
| 43    | At1g72390 |        | At3g10070 | TAF12  | 1056.8      | 3177.3         | 450.3           | 3261.2         | 2811.9          |
| 44    | At4g16420 | ADA2B  | At4g31720 | TAF10  | 1075.7      | 2188.5         | 4541.6          | 2344.7         | 17.4            |
| 45    | At1g54140 | TAF9   | At2g17930 | TRA1A  | 1140.2      | 211.7          | 21441.6         | 14897.3        | 640             |
| 46    | At1g72390 |        | At5g10790 | UBP22  | 1147        | 3321.4         | 584.1           | 3348.9         | 9222.1          |
| 47    | At4g16420 | ADA2B  | At5g58575 |        | 1175.3      | 7785.6         | 920.7           | 1499.3         | 1762.8          |
| 48    | At4g29790 |        | At5g58575 |        | 1195.5      | 624.8          | 9594.9          | 1291           | 1966.4          |
| 49    | At1g04950 | TAF6   | At1g72390 |        | 1331.1      | 2755.2         | 3837.1          | 4852.6         | 397.8           |
| 50    | At2g13370 | CHR5   | At2g17930 | TRA1A  | 1438.6      | 5119.3         | 7426.7          | 1606.5         | 133.9           |
| 51    | At1g02680 | TAF13  | At1g17440 | TAF12B | 1490.5      | 1044.8         | 11102.1         | 4385.5         | 1770.7          |
| 52    | At1g54140 | TAF9   | At3g10070 | TAF12  | 1501        | 1855.4         | 6495.3          | 18679.8        | 1960.3          |
| 53    | At1g02680 | TAF13  | At3g54610 | GCN5   | 1517.4      | 512            | 3250.3          | 4148.3         | 13157.9         |
| 54    | At1g17440 | TAF12B | At1g32750 | HAF01  | 1527        | 1880.8         | 8200.7          | 821.2          | 2976.9          |
| 55    | At1g04950 | TAF6   | At3g54610 | GCN5   | 1532.7      | 683.2          | 571.5           | 4620.3         | 10099.1         |
| 56    | At1g04950 | TAF6   | At5g58575 |        | 1561.7      | 14556          | 490.7           | 964.7          | 2144.1          |
| 57    | At1g04950 | TAF6   | At1g54360 | TAF6B4 | 1596.4      | 2707           | 4842.9          | 3184.6         | 1643.6          |
| 58    | At3g10070 | TAF12  | At3g54610 | GCN5   | 1633.8      | 2121.7         | 7467.6          | 4182.5         | 1139.2          |
| 59    | At3g10070 | TAF12  | At5g10790 | UBP22  | 1762.1      | 13780          | 62.4            | 5011.8         | 13784.9         |
| 60    | At2g14850 |        | At4g29790 |        | 1771.9      | 441.9          | 1964.2          | 10415.7        | 19140           |
| 61    | At1g54140 | TAF9   | At4g16420 | ADA2B  | 1889.8      | 1243.2         | 4331.1          | 1841.1         | 1340.9          |
| 62    | At2g17930 | TRA1A  | At3g54610 | GCN5   | 2065.7      | 338.9          | 6722.4          | 2479.2         | 11210.9         |
| 63    | At1g54140 | TAF9   | At1g72390 |        | 2070.5      | 3967.8         | 3070.9          | 5405.9         | 316.5           |
| 64    | At3g54610 | GCN5   | At4g16420 | ADA2B  | 2091.4      | 1710.1         | 5018.6          | 398.6          | 10305.8         |
| 65    | At1g04950 | TAF6   | At1g32750 | HAF01  | 2130.9      | 3833.8         | 3510.5          | 2725.4         | 19705.3         |
| 66    | At1g02680 | TAF13  | At1g54360 | TAF6B4 | 2202.6      | 2241.5         | 9594.7          | 2007.3         | 648.5           |
| 67    | At2g17930 | TRA1A  | At4g31720 | TAF10  | 2218.9      | 2717.3         | 13000.1         | 2358.4         | 357             |
| 68    | At1g54360 | TAF6B4 | At3g27100 |        | 2373.5      | 3580           | 7606.3          | 489.4          | 1742.5          |
| 69    | At1g54140 | TAF9   | At2g14850 |        | 2456.3      | 3630.5         | 6181.6          | 2305.5         | 12267.7         |
| 70    | At2g17930 | TRA1A  | At3g10070 | TAF12  | 2519.8      | 2225.7         | 2472.4          | 4844           | 5244            |
| 71    | At1g02680 | TAF13  | At4g29790 |        | 2802.6      | 7589.2         | 3958            | 3889.1         | 556             |
| 72    | At1g04950 | TAF6   | At4g29790 |        | 2965        | 11547.5        | 4488.5          | 9087.8         | 2271.8          |
| 73    | At3g27100 |        | At4g16420 | ADA2B  | 3007.9      | 6549.6         | 3131.6          | 1428.2         | 6145.5          |
| 74    | At2g13370 | CHR5   | At5g10790 | UBP22  | 3164        | 1599.2         | 1813.4          | 5161.7         | 21397.9         |
| 75    | At1g54140 | TAF9   | At1g54360 | TAF6B4 | 3230.7      | 2291           | 4121.9          | 18659          | 1565.3          |
| 76    | At4g16420 | ADA2B  | At5g40550 |        | 3244.4      | 2813.1         | 4415.3          | 8781.8         | 2825.6          |
| 77    | At2g13370 | CHR5   | At5g58575 |        | 3248.4      | 3902.7         | 8219.8          | 1425.2         | 17800.4         |
| 78    | At1g72390 |        | At5g58575 |        | 3349.1      | 2736.4         | 7775.9          | 2403.8         | 13506.4         |
| 79    | At1g02680 | TAF13  | At5g58575 |        | 3376.7      | 11474.3        | 699.6           | 104.4          | 188.1           |
| 80    | At1g17440 | TAF12B | At1g54360 | TAF6B4 | 3456.8      | 4046.6         | 19058.5         | 750.4          | 1572.6          |
| 81    | At3g10070 | TAF12  | At4g16420 | ADA2B  | 3572.4      | 1738.7         | 1591.7          | 6684.9         | 8094.8          |
| 82    | At1g17440 | TAF12B | At3g10070 | TAF12  | 3641.8      | 10591.4        | 1157.1          | 5715.2         | 2010.7          |
| 83    | At1g17440 | TAF12B | At5g10790 | UBP22  | 3642.8      | 12151.9        | 1268.1          | 3072.4         | 21406.2         |
| 84    | At2g13370 | CHR5   | At2g14850 |        | 3704.1      | 6221.4         | 465.6           | 2622.7         | 17498.2         |
| 85    | At2g17930 | TRA1A  | At5g40550 |        | 3718.6      | 6512           | 1506.7          | 2875.2         | 13551.1         |
| 86    | At3g10070 | TAF12  | At4g31720 | TAF10  | 3746.7      | 2122.1         | 19512.2         | 6958           | 7126.3          |
| 87    | At2g13370 | CHR5   | At3g10070 | TAF12  | 3747.6      | 7678.1         | 884             | 2512           | 3531.5          |
| 88    | At2g14850 |        | At3g54610 | GCN5   | 3748.2      | 4818.3         | 3790.2          | 3252.1         | 14056.6         |
| 89    | At1g72390 |        | At4g31720 | TAF10  | 3755.1      | 5482.3         | 10768.4         | 5151.6         | 346.8           |
| 90    | At4g31720 | TAF10  | At5g58575 |        | 3779.4      | 13586.6        | 2267.1          | 7.8            | 6255.3          |

|     |           |        |           |        |        |         |         |         |         |
|-----|-----------|--------|-----------|--------|--------|---------|---------|---------|---------|
| 91  | At1g54140 | TAF9   | At3g27100 |        | 3807.9 | 2548.2  | 6256.2  | 14730.4 | 7072.7  |
| 92  | At4g29790 |        | At5g10790 | UBP22  | 3819.5 | 1548.8  | 10561   | 3818.8  | 6219.9  |
| 93  | At1g72390 |        | At5g40550 |        | 3836.1 | 7835.7  | 1799.8  | 11166.8 | 15171.3 |
| 94  | At2g14850 |        | At2g17930 | TRA1A  | 3838.9 | 1747    | 21300.7 | 2975.6  | 10137.9 |
| 95  | At1g32750 | HAF01  | At5g40550 |        | 3890.1 | 8313.9  | 1934.6  | 4921.5  | 5648.2  |
| 96  | At2g13370 | CHR5   | At3g27100 |        | 3919.3 | 10181.7 | 6059.9  | 335     | 7323    |
| 97  | At2g17930 | TRA1A  | At4g29790 |        | 3954.2 | 7415.1  | 15071   | 3098.7  | 1674.3  |
| 98  | At2g17930 | TRA1A  | At3g27100 |        | 3960.2 | 4267.6  | 14180.2 | 305.4   | 9076.8  |
| 99  | At3g27100 |        | At5g58575 |        | 3979.9 | 12609.9 | 2263.1  | 851.1   | 4984.8  |
| 100 | At1g04950 | TAF6   | At1g54140 | TAF9   | 4021.8 | 117.8   | 18025.9 | 18613.8 | 2393.9  |
| 101 | At1g54140 | TAF9   | At5g40550 |        | 4262.7 | 4588.1  | 9902.9  | 10823.8 | 18280.6 |
| 102 | At1g54360 | TAF6B4 | At4g31720 | TAF10  | 4305.9 | 8233.5  | 4415.6  | 2749.6  | 618.4   |
| 103 | At1g02680 | TAF13  | At3g10070 | TAF12  | 4312.3 | 3202.5  | 10864.3 | 2754.9  | 6056.2  |
| 104 | At1g02680 | TAF13  | At2g13370 | CHR5   | 4321.1 | 12073.2 | 7769.8  | 375     | 5097.2  |
| 105 | At3g27100 |        | At3g54610 | GCN5   | 4357.1 | 1671.7  | 6430.5  | 1328.9  | 14953.4 |
| 106 | At3g54610 | GCN5   | At4g31720 | TAF10  | 4376.7 | 2498.7  | 4974.5  | 9497.3  | 14250.4 |
| 107 | At1g17440 | TAF12B | At3g54610 | GCN5   | 4486.7 | 5489.7  | 15910.5 | 2894.9  | 5267.2  |
| 108 | At1g72390 |        | At3g54610 | GCN5   | 4544.8 | 6174.7  | 7313.5  | 2093.4  | 4155.4  |
| 109 | At5g10790 | UBP22  | At5g58575 |        | 4648.6 | 665     | 4898    | 10566   | 7433.2  |
| 110 | At1g32750 | HAF01  | At3g10070 | TAF12  | 4691.2 | 5010.4  | 760.6   | 3436.1  | 11187.5 |
| 111 | At1g32750 | HAF01  | At3g54610 | GCN5   | 4708.6 | 6331.9  | 2130.6  | 4589.1  | 3945    |
| 112 | At1g17440 | TAF12B | At1g54140 | TAF9   | 4794.9 | 6853.8  | 15122.8 | 4872.4  | 295.7   |
| 113 | At1g04950 | TAF6   | At5g40550 |        | 4814.8 | 3885.4  | 5170.3  | 4267.5  | 3947.8  |
| 114 | At1g54360 | TAF6B4 | At4g16420 | ADA2B  | 4967.6 | 6703.3  | 12344.9 | 5335.5  | 1138.5  |
| 115 | At4g16420 | ADA2B  | At5g10790 | UBP22  | 4980.1 | 10884.9 | 2305    | 5982.3  | 13056.8 |
| 116 | At2g14850 |        | At3g10070 | TAF12  | 5225   | 7049.9  | 9878.4  | 8468.3  | 9665.9  |
| 117 | At1g32750 | HAF01  | At1g54140 | TAF9   | 5238.2 | 3994.8  | 9817    | 10433   | 10915   |
| 118 | At1g32750 | HAF01  | At3g27100 |        | 5375   | 6006    | 14507.1 | 2866.5  | 4446.8  |
| 119 | At2g13370 | CHR5   | At3g54610 | GCN5   | 5532.8 | 10860   | 2476.2  | 2348.9  | 5965.1  |
| 120 | At1g32750 | HAF01  | At5g10790 | UBP22  | 5771.3 | 7107.8  | 5109.4  | 9222.4  | 16902.4 |
| 121 | At1g32750 | HAF01  | At4g31720 | TAF10  | 5843.1 | 4663.6  | 7825.5  | 3109.6  | 17931.9 |
| 122 | At1g04950 | TAF6   | At2g13370 | CHR5   | 5853.1 | 11766.7 | 11588.2 | 5274.1  | 12853.7 |
| 123 | At1g04950 | TAF6   | At3g10070 | TAF12  | 5885.1 | 929.8   | 13156.2 | 4463.3  | 7600.5  |
| 124 | At1g04950 | TAF6   | At2g14850 |        | 5906.7 | 3019.7  | 12191.5 | 7894.6  | 14107.2 |
| 125 | At1g54360 | TAF6B4 | At3g10070 | TAF12  | 5978.7 | 7297.9  | 6413.5  | 1551.3  | 4132.7  |
| 126 | At4g31720 | TAF10  | At5g40550 |        | 6084.3 | 1887.7  | 10971.6 | 19028.5 | 16785.9 |
| 127 | At2g14850 |        | At3g27100 |        | 6694.2 | 7468.7  | 8202.4  | 4007.6  | 9894.9  |
| 128 | At1g04950 | TAF6   | At3g27100 |        | 6830.1 | 8716.5  | 5061.9  | 2360.5  | 19061.3 |
| 129 | At2g17930 | TRA1A  | At5g58575 |        | 6981.2 | 13336.8 | 852.4   | 1867.3  | 18378.1 |
| 130 | At1g32750 | HAF01  | At1g54360 | TAF6B4 | 7101.5 | 16103.4 | 859.9   | 3823.3  | 5452.1  |
| 131 | At3g54610 | GCN5   | At5g40550 |        | 7163.9 | 5889.1  | 8837.1  | 11196.4 | 18156.1 |
| 132 | At2g14850 |        | At5g58575 |        | 7505.5 | 3229.1  | 12156.3 | 2887.3  | 15309.9 |
| 133 | At2g13370 | CHR5   | At4g31720 | TAF10  | 7741.2 | 10675.9 | 22128.3 | 1024.6  | 3271.2  |
| 134 | At1g04950 | TAF6   | At1g17440 | TAF12B | 7883.9 | 5410    | 18056.6 | 10341.4 | 6445.2  |
| 135 | At1g02680 | TAF13  | At5g40550 |        | 7935.9 | 9559.2  | 10303.4 | 8254.3  | 1542.9  |
| 136 | At2g14850 |        | At4g31720 | TAF10  | 8412.4 | 4027.9  | 16101.9 | 2895.3  | 15955.6 |
| 137 | At3g27100 |        | At5g40550 |        | 8841.5 | 8222.9  | 11837.2 | 11362.5 | 5388.4  |
| 138 | At1g54360 | TAF6B4 | At5g40550 |        | 8906.4 | 14125.6 | 2284.8  | 5117.6  | 7160.5  |
| 139 | At3g27100 |        | At4g29790 |        | 9265.8 | 12560.3 | 8933.9  | 6493.8  | 17394.1 |
| 140 | At5g40550 |        | At5g58575 |        | 9360.1 | 10485.6 | 2129.9  | 13255.5 | 11896.7 |
| 141 | At1g17440 | TAF12B | At5g58575 |        | 9689.1 | 6644.9  | 10859.3 | 5542.1  | 12085.3 |
| 142 | At3g54610 | GCN5   | At4g29790 |        | 9696.7 | 14439.2 | 7849.8  | 10191.6 | 3400.9  |

|     |                  |        |                  |       |         |         |         |         |         |
|-----|------------------|--------|------------------|-------|---------|---------|---------|---------|---------|
| 143 | <b>At4g29790</b> |        | <b>At4g31720</b> | TAF10 | 9793    | 12587   | 13821.5 | 7385.3  | 3094.4  |
| 144 | <b>At1g17440</b> | TAF12B | <b>At3g27100</b> |       | 9873.5  | 9356.2  | 17193.1 | 3086.9  | 14415.6 |
| 145 | <b>At1g72390</b> |        | <b>At3g27100</b> |       | 10071.3 | 9812.6  | 14895   | 2043    | 19734.2 |
| 146 | <b>At2g13370</b> | CHR5   | <b>At5g40550</b> |       | 10346.8 | 3931    | 13280   | 12883.5 | 19281.8 |
| 147 | <b>At2g17930</b> | TRA1A  | <b>At5g10790</b> | UBP22 | 10771.3 | 16800.7 | 5130.6  | 6095.1  | 18944.2 |
| 148 | <b>At1g54360</b> | TAF6B4 | <b>At1g72390</b> |       | 10773   | 15791.2 | 10724.9 | 3134.8  | 3148.2  |
| 149 | <b>At1g54360</b> | TAF6B4 | <b>At2g13370</b> | CHR5  | 11099.4 | 19238.6 | 16694.5 | 2442.2  | 1993.6  |
| 150 | <b>At3g27100</b> |        | <b>At5g10790</b> | UBP22 | 11165.1 | 13797.3 | 11742.4 | 2310.8  | 13092.8 |
| 151 | <b>At1g54140</b> | TAF9   | <b>At2g13370</b> | CHR5  | 11905.2 | 15111.4 | 18873.3 | 11297.7 | 964.3   |
| 152 | <b>At1g54140</b> | TAF9   | <b>At4g29790</b> |       | 12772.1 | 14337.5 | 14951.3 | 2654    | 1778.2  |
| 153 | <b>At2g14850</b> |        | <b>At5g10790</b> | UBP22 | 13031.3 | 10619.5 | 11821.6 | 16446.8 | 19427.3 |
| 154 | <b>At2g14850</b> |        | <b>At5g40550</b> |       | 13228   | 13661.5 | 17455.6 | 11868.5 | 547.2   |
| 155 | <b>At1g54360</b> | TAF6B4 | <b>At2g14850</b> |       | 14298.8 | 12267.2 | 18444   | 7935    | 11624.4 |
| 156 | <b>At3g10070</b> | TAF12  | <b>At4g29790</b> |       | 14723.6 | 11886.2 | 17077.6 | 20380.2 | 3455.6  |
| 157 | <b>At1g17440</b> | TAF12B | <b>At5g40550</b> |       | 14776.6 | 20624.4 | 9277.2  | 6549.1  | 17356.5 |
| 158 | <b>At1g54360</b> | TAF6B4 | <b>At5g58575</b> |       | 14937.3 | 19917.6 | 6379.5  | 3471.5  | 12674.1 |
| 159 | <b>At3g10070</b> | TAF12  | <b>At3g27100</b> |       | 15303.1 | 12231   | 19894   | 3322.3  | 18092.3 |
| 160 | <b>At4g29790</b> |        | <b>At5g40550</b> |       | 15569.4 | 12957   | 15340.7 | 11427.4 | 13896.7 |
| 161 | <b>At1g02680</b> | TAF13  | <b>At5g10790</b> | UBP22 | 15648.4 | 18698.6 | 15654.5 | 5465.7  | 15914.5 |
| 162 | <b>At1g17440</b> | TAF12B | <b>At4g31720</b> | TAF10 | 16344.4 | 15403.8 | 22616.2 | 7331.4  | 1717.3  |
| 163 | <b>At1g54140</b> | TAF9   | <b>At5g10790</b> | UBP22 | 16470.6 | 20083   | 10932   | 13833.9 | 15515.4 |
| 164 | <b>At1g54360</b> | TAF6B4 | <b>At5g10790</b> | UBP22 | 17315   | 21010.3 | 13178.6 | 2149.4  | 22712   |
| 165 | <b>At1g04950</b> | TAF6   | <b>At5g10790</b> | UBP22 | 17328.7 | 19247   | 14768.1 | 11680.9 | 13632.9 |
| 166 | <b>At3g54610</b> | GCN5   | <b>At5g10790</b> | UBP22 | 17670   | 20398.3 | 18611.2 | 4380    | 5140.5  |
| 167 | <b>At1g54360</b> | TAF6B4 | <b>At4g29790</b> |       | 18137.7 | 19283.2 | 21084.6 | 11704.1 | 8997.6  |
| 168 | <b>At3g54610</b> | GCN5   | <b>At5g58575</b> |       | 18783.1 | 19223.5 | 6420    | 5987.1  | 19339.3 |
| 169 | <b>At1g54140</b> | TAF9   | <b>At5g58575</b> |       | 19236.4 | 15966.1 | 15601.9 | 15513.4 | 14085.2 |
| 170 | <b>At3g10070</b> | TAF12  | <b>At5g58575</b> |       | 19725.7 | 16208.3 | 5683.2  | 9919.2  | 17563   |
| 171 | <b>At4g31720</b> | TAF10  | <b>At5g10790</b> | UBP22 | 20462.2 | 16238.5 | 21426.9 | 14806.4 | 19161.3 |
