# Supplementary material for: Spt-Ada-Gcn5-Acetyltransferase (SAGA) Complex in Plants: Genome Wide Identification, Evolutionary Conservation and Functional Determination
Source: PubMed Central journal article supplement (PMC4532415; doi:10.1371/journal.pone.0134709), 2015-08-11
Supplement: pone.0134709.s017.pdf [file pone.0134709.s017.pdf]

**S10 Table:** List of genes obtained from ATTED-II for *Arabidopsis* SAGA complex co-expressed gene network analysis.

| S.N. | Locus     | Target* | Function                                                                      |
|------|-----------|---------|-------------------------------------------------------------------------------|
| 1    | At3g15351 | O,M     |                                                                               |
| 2    | At1g70620 | O,N     | cyclin-related                                                                |
| 3    | At3g01320 | M,N     | SIN3-like 1                                                                   |
| 4    | At1g35470 | O,Y     | SPLa/RYanodine receptor (SPRY) domain-containing protein                      |
| 5    | At4g05000 | O,N_P   | Vacuolar protein sorting-associated protein VPS28 family protein              |
| 6    | At1g03190 | O,Y     | RAD3-like DNA-binding helicase protein                                        |
| 7    | At3g19870 | O,P     |                                                                               |
| 8    | At5g55310 | O,N     | DNA topoisomerase 1 beta                                                      |
| 9    | At1g15440 | O,Y     | periodic tryptophan protein 2                                                 |
| 10   | At3g03880 | C,N     | Protein of unknown function (DUF1639)                                         |
| 11   | At1g02890 | C,C     | AAA-type ATPase family protein                                                |
| 12   | At1g24706 | O,N     | THO2                                                                          |
| 13   | At4g31160 | O,N     | DDB1-CUL4 associated factor 1                                                 |
| 14   | At5g32470 | M,C     | Haem oxygenase-like, multi-helical                                            |
| 15   | At3g07650 | O,N     | CONSTANS-like 9                                                               |
| 16   | At5g01400 | M,N     | HEAT repeat-containing protein                                                |
| 17   | At5g49930 | O,Y     | zinc knuckle (CCHC-type) family protein                                       |
| 18   | At3g01610 | M,N     | cell division cycle 48C                                                       |
| 19   | At2g47330 | M,N     | P-loop containing nucleoside triphosphate hydrolases superfamily protein      |
| 20   | At5g03770 | M,C     | KDO transferase A                                                             |
| 21   | At3g12480 | O,N     | nuclear factor Y, subunit C11                                                 |
| 22   | At5g14080 | M,C     | Tetratricopeptide repeat (TPR)-like superfamily protein                       |
| 23   | At2g33340 | O,Y     | MOS4-associated complex 3B                                                    |
| 24   | At1g52740 | O,N     | histone H2A protein 9                                                         |
| 25   | At1g79280 | O,N     | nuclear pore anchor                                                           |
| 26   | At2g41710 | O,N     | Integrase-type DNA-binding superfamily protein                                |
| 27   | At5g43900 | O,S     | myosin 2                                                                      |
| 28   | At1g58230 | C,N     | binding                                                                       |
| 29   | At2g17670 | C,C     | Tetratricopeptide repeat (TPR)-like superfamily protein                       |
| 30   | At1g03060 | C,P     | Beige/BEACH domain ;WD domain, G-beta repeat protein                          |
| 31   | At4g11560 | O,N     | bromo-adjacent homology (BAH) domain-containing protein                       |
| 32   | At4g21430 | O,N     | Zinc finger, RING-type;Transcription factor jumonji/aspartyl beta-hydroxylase |
| 33   | At1g05380 | C,N     | Acyl-CoA N-acyltransferase with RING/FYVE/PHD-type zinc finger protein        |
| 34   | At1g71010 | O,N     | FORMS APLOID AND BINUCLEATE CELLS 1C                                          |
| 35   | At2g28290 | O,N     | P-loop containing nucleoside triphosphate hydrolases superfamily protein      |
| 36   | At5g23330 | M,C     | Nucleotidyl transferase superfamily protein                                   |
| 37   | At3g58530 | O,N     | RNI-like superfamily protein                                                  |
| 38   | At1g67500 | O,N     | recovery protein 3                                                            |
| 39   | At2g25660 | C,C     | embryo defective 2410                                                         |

|    |           |     |                                                                                            |
|----|-----------|-----|--------------------------------------------------------------------------------------------|
| 40 | At5g19660 | M,P | SITE-1 protease                                                                            |
| 41 | At3g51120 | O,N | DNA binding;zinc ion binding;nucleic acid binding;nucleic acid binding                     |
| 42 | At1g64570 | O,N | Homeodomain-like superfamily protein                                                       |
| 43 | At1g09730 | O,N | Cysteine proteinases superfamily protein                                                   |
| 44 | At1g16610 | C,N | arginine/serine-rich 45                                                                    |
| 45 | At2g28240 | O,N | ATP-dependent helicase family protein                                                      |
| 46 | At4g37120 | O,N | Pre-mRNA splicing Prp18-interacting factor                                                 |
| 47 | At5g02850 | C,C | hydroxyproline-rich glycoprotein family protein                                            |
| 48 | At2g47410 | O,N | WD40/YVTN repeat-like-containing domain;Bromodomain                                        |
| 49 | At5g48250 | O,N | B-box type zinc finger protein with CCT domain                                             |
| 50 | At2g24765 | O,C | ADP-ribosylation factor 3                                                                  |
| 51 | At1g65660 | O,N | Pre-mRNA splicing Prp18-interacting factor                                                 |
| 52 | At5g61140 | M,C | U5 small nuclear ribonucleoprotein helicase                                                |
| 53 | At5g08190 | O,C | nuclear factor Y, subunit B12                                                              |
| 54 | At5g06240 | O,C | embryo defective 2735                                                                      |
| 55 | At3g22380 | M,N | time for coffee                                                                            |
| 56 | At5g59830 | O,N |                                                                                            |
| 57 | At3g15120 | O,N | P-loop containing nucleoside triphosphate hydrolases superfamily protein                   |
| 58 | At5g60960 | C,C | Pentatricopeptide repeat (PPR) superfamily protein                                         |
| 59 | At5g23090 | O,C | nuclear factor Y, subunit B13                                                              |
| 60 | At3g49100 | O,C | Signal recognition particle, SRP9/SRP14 subunit                                            |
| 61 | At1g73240 | O,C |                                                                                            |
| 62 | At5g55600 | O,N | agenet domain-containing protein / bromo-adjacent homology (BAH) domain-containing protein |
| 63 | At2g47990 | O,N | transducin family protein / WD-40 repeat family protein                                    |
| 64 | At1g16710 | M,N | histone acetyltransferase of the CBP family 12                                             |
| 65 | At5g62440 | O,N | Protein of unknown function (DUF3223)                                                      |
| 66 | At2g37080 | C,N | ROP interactive partner 3                                                                  |
| 67 | At1g20300 | M,C | Pentatricopeptide repeat (PPR) superfamily protein                                         |
| 68 | At2g29020 | O,E | Rab5-interacting family protein                                                            |
| 69 | At5g61380 | O,N | CCT motif -containing response regulator protein                                           |
| 70 | At4g15520 | O,Y | tRNA/rRNA methyltransferase (SpoU) family protein                                          |
| 71 | At3g54230 | O,N | suppressor of abi3-5                                                                       |
| 72 | At2g45200 | O,G | golgi snare 12                                                                             |
| 73 | At5g16680 | M,N | RING/FYVE/PHD zinc finger superfamily protein                                              |
| 74 | At4g03120 | O,N | C2H2 and C2HC zinc fingers superfamily protein                                             |
| 75 | At5g50410 | O,N |                                                                                            |
| 76 | At5g16780 | O,N | SART-1 family                                                                              |
| 77 | At3g19670 | O,N | pre-mRNA-processing protein 40B                                                            |
| 78 | At1g44780 | O,N |                                                                                            |
| 79 | At4g28990 | O,N | RNA-binding protein-related                                                                |
| 80 | At4g21710 | O,N | DNA-directed RNA polymerase family protein                                                 |
| 81 | At1g17110 | S,  | ubiquitin-specific protease 15                                                             |

|     |           |     |                                                                             |
|-----|-----------|-----|-----------------------------------------------------------------------------|
| 82  | At2g43810 | O,Y | Small nuclear ribonucleoprotein family protein                              |
| 83  | At2g41500 | C,N | WD-40 repeat family protein / small nuclear ribonucleoprotein Prp4p-related |
| 84  | At2g33440 | O,K | RNA-binding (RRM/RBD/RNP motifs) family protein                             |
| 85  | At5g12400 | O,N | DNA binding;zinc ion binding;DNA binding                                    |
| 86  | At3g22980 | O,Y | Ribosomal protein S5/Elongation factor G/III/V family protein               |
| 87  | At1g77800 | O,N | PHD finger family protein                                                   |
| 88  | At1g06470 | O,P | Nucleotide/sugar transporter family protein                                 |
| 89  | At5g39600 | O,C |                                                                             |
| 90  | At1g80020 |     | transposable element gene                                                   |
| 91  | At3g45830 | O,N |                                                                             |
| 92  | At1g21560 | O,N |                                                                             |
| 93  | At1g75140 | S,P |                                                                             |
| 94  | At1g48550 | C,M | Vacuolar protein sorting-associated protein 26                              |
| 95  | At2g39260 | O,N | binding;RNA binding                                                         |
| 96  | At2g03150 | M,N | ATP/GTP-binding protein family                                              |
| 97  | At5g55040 | M,N | DNA-binding bromodomain-containing protein                                  |
| 98  | At3g13222 | O,N | GBF-interacting protein 1                                                   |
| 99  | At1g02750 | O,N | Drought-responsive family protein                                           |
| 100 | At5g23110 | O,Y | Zinc finger, C3HC4 type (RING finger) family protein                        |
| 101 | At5g10710 | O,N |                                                                             |
| 102 | At1g28050 | O,N | B-box type zinc finger protein with CCT domain                              |
| 103 | At1g09280 | O,N |                                                                             |
| 104 | At4g32910 | O,N |                                                                             |
| 105 | At5g15680 | M,N | ARM repeat superfamily protein                                              |
| 106 | At3g32940 | C,N | RNA-binding KH domain-containing protein                                    |
| 107 | At5g23610 | O,N |                                                                             |
| 108 | At3g06400 | O,Y | chromatin-remodeling protein 11                                             |
| 109 | At5g13010 | O,N | RNA helicase family protein                                                 |
| 110 | At1g24190 | O,N | SIN3-like 3                                                                 |
| 111 | At3g07080 | S,P | EamA-like transporter family                                                |
| 112 | At1g01040 | O,N | dicer-like 1                                                                |
| 113 | At3g61620 | O,Y | 3'-5'-exoribonuclease family protein                                        |
| 114 | At5g14530 | O,Y | Transducin/WD40 repeat-like superfamily protein                             |
| 115 | At1g12830 | O,N |                                                                             |
| 116 | At1g09770 | O,Y | cell division cycle 5                                                       |
| 117 | At3g58660 | C,Y | Ribosomal protein L1p/L10e family                                           |
| 118 | At1g10270 | M,C | glutamine-rich protein 23                                                   |
| 119 | At2g26920 | C,N | Ubiquitin-associated/translation elongation factor EF1B protein             |
| 120 | At1g28420 | O,N | homeobox-1                                                                  |
| 121 | At5g58040 | O,N | homolog of yeast FIP1 [V]                                                   |
| 122 | At1g18450 | O,N | actin-related protein 4                                                     |
| 123 | At2g04540 | M,C | Beta-ketoacyl synthase                                                      |
| 124 | At5g66360 | M,C | Ribosomal RNA adenine dimethylase family protein                            |

|     |           |       |                                                                               |
|-----|-----------|-------|-------------------------------------------------------------------------------|
| 125 | At3g12550 | O,Y   | XH/XS domain-containing protein                                               |
| 126 | At3g13190 | O,Y   | Plant protein of unknown function (DUF827)                                    |
| 127 | At2g45640 | M,Y   | SIN3 associated polypeptide P18                                               |
| 128 | At4g13160 | S,P   | Protein of unknown function, DUF593                                           |
| 129 | At1g71350 | O,Y   | eukaryotic translation initiation factor SUI1 family protein                  |
| 130 | At3g06960 | O,N   | pigment defective 320                                                         |
| 131 | At3g12980 | M,N   | histone acetyltransferase of the CBP family 5                                 |
| 132 | At5g43670 | O,N   | Sec23/Sec24 protein transport family protein                                  |
| 133 | At1g76860 | O,Y   | Small nuclear ribonucleoprotein family protein                                |
| 134 | At1g27430 | O,N   | GYF domain-containing protein                                                 |
| 135 | At1g43850 | C,N   | SEUSS transcriptional co-regulator                                            |
| 136 | At1g80010 | C,N   | FAR1-related sequence 8                                                       |
| 137 | At1g64750 | O,N   | deletion of SUV3 suppressor 1(I)                                              |
| 138 | At1g48090 | S,N   | calcium-dependent lipid-binding family protein                                |
| 139 | At3g51500 | C,Y_N |                                                                               |
| 140 | At1g27900 | O,N   | RNA helicase family protein                                                   |
| 141 | At1g19370 | S,P   |                                                                               |
| 142 | At3g49490 | O,N   |                                                                               |
| 143 | At5g13480 | O,N   | Transducin/WD40 repeat-like superfamily protein                               |
| 144 | At3g08850 | O,N   | HEAT repeat ;WD domain, G-beta repeat protein protein                         |
| 145 | At5g25060 | O,N   | RNA recognition motif (RRM)-containing protein                                |
| 146 | At1g80070 | C,Y   | Pre-mRNA-processing-splicing factor                                           |
| 147 | At1g48430 | O,Y   | Dihydroxyacetone kinase                                                       |
| 148 | At2g35330 | S,C   | RING/U-box superfamily protein                                                |
| 149 | At3g02260 | O,N   | auxin transport protein (BIG)                                                 |
| 150 | At4g02560 | O,N   | Homeodomain-like superfamily protein                                          |
| 151 | At5g67320 | S,N   | WD-40 repeat family protein                                                   |
| 152 | At3g50380 | M,P   | Protein of unknown function (DUF1162)                                         |
| 153 | At1g61870 | M,C   | pentatricopeptide repeat 336                                                  |
| 154 | At3g27260 | O,N   | global transcription factor group E8                                          |
| 155 | At5g22450 | C,N   |                                                                               |
| 156 | At3g44680 | O,Y   | histone deacetylase 9                                                         |
| 157 | At3g22660 | O,N   | rRNA processing protein-related                                               |
| 158 | At3g51620 | O,N   | PAP/OAS1 substrate-binding domain superfamily                                 |
| 159 | At5g56240 | C,N   |                                                                               |
| 160 | At1g59820 | M,P   | aminophospholipid ATPase 3                                                    |
| 161 | At3g01770 | O,N   | bromodomain and extraterminal domain protein 10                               |
| 162 | At4g31200 | M,N   | SWAP (Suppressor-of-White-APricot)/surp RNA-binding domain-containing protein |
| 163 | At1g50660 | C,N   |                                                                               |
| 164 | At2g01060 | O,N   | myb-like HTH transcriptional regulator family protein                         |
| 165 | At1g07830 | M,C   | ribosomal protein L29 family protein                                          |
| 166 | At5g10490 | C,C   | MSCS-like 2                                                                   |

|     |           |     |                                                                                                |
|-----|-----------|-----|------------------------------------------------------------------------------------------------|
| 167 | At5g55300 | O,N | DNA topoisomerase I alpha                                                                      |
| 168 | At5g66180 | O,Y | S-adenosyl-L-methionine-dependent methyltransferases superfamily protein                       |
| 169 | At1g02080 | C,Y | transcription regulators                                                                       |
| 170 | At2g44850 | O,Y |                                                                                                |
| 171 | At3g57300 | O,N | INO80 ortholog                                                                                 |
| 172 | At5g42420 | O,V | Nucleotide-sugar transporter family protein                                                    |
| 173 | At1g20960 | M,Y | U5 small nuclear ribonucleoprotein helicase, putative                                          |
| 174 | At1g05120 | O,N | Helicase protein with RING/U-box domain                                                        |
| 175 | At3g10650 | O,N |                                                                                                |
| 176 | At5g45010 | O,Y | DSS1 homolog on chromosome V                                                                   |
| 177 | At3g06940 |     | transposable element gene                                                                      |
| 178 | At1g60200 | C,N | splicing factor PWI domain-containing protein / RNA recognition motif (RRM)-containing protein |
| 179 | At5g63280 | S,P | C2H2-like zinc finger protein                                                                  |
| 180 | At5g64730 | O,Y | Transducin/WD40 repeat-like superfamily protein                                                |
| 181 | At3g28730 | O,N | high mobility group                                                                            |

\*C-chloroplast; E-Endoplasmic reticulum; G-golgi bodies; K-cytoskeletal; L-lysosome; M-mitochondria; N-nuclear; P-plasma membrane; S-extracellular; V-vacuole; X-peroxisome; Y-cytoplasm
