# Supplementary material for: Spt-Ada-Gcn5-Acetyltransferase (SAGA) Complex in Plants: Genome Wide Identification, Evolutionary Conservation and Functional Determination
Source: PubMed Central journal article supplement (PMC4532415; doi:10.1371/journal.pone.0134709), 2015-08-11
Supplement: pone.0134709.s018.pdf [file pone.0134709.s018.pdf]

**S11 Table:** Analysis of cis-regulatory element in 1000bp upstream promoter sequences from TSS in SAGA complex subunit genes using PlantCARE and PLACE database.

| S. No. | GENE   | Locus     | Site            | Position from TSS | Strand | Element Sequence | Function                                                         |
|--------|--------|-----------|-----------------|-------------------|--------|------------------|------------------------------------------------------------------|
| 1      | TAF13  | AT1G02680 | HSE             | 288               | -      | AGAAAATTTCG      | cis-acting element involved in heat stress responsiveness        |
|        |        |           | MBS             | 436               | -      | CAACTG           | MYB binding site involved in drought-inducibility                |
|        |        |           |                 | 954               | -      | CAACTG           | MYB binding site involved in drought-inducibility                |
|        |        |           |                 | 795               | +      | CAACTG           | MYB binding site involved in drought-inducibility                |
|        |        |           | TC-rich repeats | 301               | +      | ATTTTCTTCA       | cis-acting element involved in defense and stress responsiveness |
|        |        |           |                 | 548               | +      | ATTTTCTCCA       | cis-acting element involved in defense and stress responsiveness |
| 2      | TAF6   | AT1G04950 | ABRE            | 671               | -      | TACGTG           | cis-acting element involved in the abscisic acid responsiveness  |
|        |        |           | HSE             | 849               | +      | AAAAAATTTTC      | cis-acting element involved in heat stress responsiveness        |
|        |        |           | LTR             | 916               | +      | CCGAAA           | cis-acting element involved in low-temperature responsiveness    |
|        |        |           | TC-rich repeats | 746               | -      | ATTTTCTTCA       | cis-acting element involved in defense and stress responsiveness |
| 3      | TAF12b | AT1G17440 | HSE             | 3                 | +      | AAAAAATTTTC      | cis-acting element involved in heat stress responsiveness        |
|        |        |           | MBS             | 420               | -      | TAACTG           | MYB binding site involved in drought-inducibility                |
|        |        |           |                 | 834               | -      | CAACTG           | MYB binding site involved in drought-inducibility                |
| 4      | TAF1   | AT1G32750 | HSE             | 190               | +      | AGAAAATTTCG      | cis-acting element involved in heat stress responsiveness        |
|        |        |           | MBS             | 492               | -      | AAAAAATTTTC      | cis-acting element involved in heat stress responsiveness        |
|        |        |           |                 | 717               | -      | TAACTG           | MYB binding site involved in drought-inducibility                |
|        |        |           | TC-rich repeats | 300               | +      | ATTTTCTCCA       | cis-acting element involved in defense and stress responsiveness |
|        |        |           |                 | 585               | -      | ATTTTCTTCA       | cis-acting element involved in defense and stress responsiveness |
|        |        |           |                 | 447               | +      | ATTTTCTTCA       | cis-acting element involved in defense and stress responsiveness |
| 5      | TAF9   | AT1G54140 | ABRE            | 364               | +      | GCCACGTACA       | cis-acting element involved in the abscisic acid responsiveness  |
|        |        |           | LTR             | 463               | -      | CCGAAA           | cis-acting element involved in low-temperature responsiveness    |
|        |        |           | MBS             | 776               | +      | CGGTCA           | MYB Binding Site                                                 |
|        |        |           | TC-rich repeats | 599               | +      | ATTTTCTTCA       | cis-acting element involved in defense and stress responsiveness |
| 6      | TAF6b  | AT1G54360 | MBS             | 386               | -      | TAACTG           | MYB binding site involved in drought-inducibility                |
|        |        |           | TC-rich repeats | 877               | +      | ATTTTCTTCA       | cis-acting element involved in defense and stress responsiveness |
| 7      | SPT20  | AT1G72390 | LTR             | 547               | -      | CCGAAA           | cis-acting element involved in low-temperature responsiveness    |
|        |        |           |                 | 85                | -      | CCGAAA           | cis-acting element involved in low-temperature responsiveness    |
|        |        |           | MBS             | 115               | -      | TAACTG           | MYB binding site involved in drought-inducibility                |
| 8      | CHR5   | AT2G13370 | MBS             | 721               | -      | CAACTG           | MYB binding site involved in drought-inducibility                |
|        |        |           | TC-rich repeats | 971               | +      | ATTTTCTCCA       | cis-acting element involved in defense and stress responsiveness |

|    |           |                  |                         |     |   |                                 |                                                                            |
|----|-----------|------------------|-------------------------|-----|---|---------------------------------|----------------------------------------------------------------------------|
| 9  | ADA1<br>A | <b>AT2G14850</b> | ABRE                    | 153 | - | CGCACGTGTC                      | cis-acting element involved in the abscisic acid responsiveness            |
|    |           |                  |                         | 66  | + | CGTACGTGCA                      | cis-acting element involved in the abscisic acid responsiveness            |
|    |           |                  |                         | 155 | - | CACGTG                          | cis-acting element involved in the abscisic acid responsiveness            |
|    |           |                  |                         | 68  | + | TACGTG                          | cis-acting element involved in the abscisic acid responsiveness            |
|    |           |                  | HSE                     | 659 | + | AAAAAATTTC                      | cis-acting element involved in heat stress responsiveness                  |
|    |           |                  |                         | 162 | - | AAAAAATTTC                      | cis-acting element involved in heat stress responsiveness                  |
|    |           |                  |                         | 211 | - | AAAAAATTTC                      | cis-acting element involved in heat stress responsiveness                  |
|    |           |                  |                         | 161 | - | AGAAAATTTCG                     | cis-acting element involved in heat stress responsiveness                  |
|    |           |                  | MBS                     | 408 | - | TAACTG                          | MYB binding site involved in drought-inducibility                          |
|    |           |                  | TC-rich repeats         | 377 | - | GTTTTCTTAC                      | cis-acting element involved in defense and stress responsiveness           |
|    |           |                  |                         | 61  | + | GTTTTCTTAC                      | cis-acting element involved in defense and stress responsiveness           |
| 10 | TRA1A     | <b>AT2G17930</b> | LTR                     | 620 | + | CCGAAA                          | cis-acting element involved in low-temperature responsiveness              |
|    |           |                  | PRECON<br>SCRHSP<br>70A | 929 | - | SCGAYNRNNNN<br>NNNNNNNNNN<br>HD | Involved in induction of HSP70A gene S=G/C; Y=C/T; R=A/G; H=T/C/A; D=A/T/G |
|    |           |                  |                         | 919 | - | SCGAYNRNNNN<br>NNNNNNNNNN<br>HD | Involved in induction of HSP70A gene S=G/C; Y=C/T; R=A/G; H=T/C/A; D=A/T/G |
| 11 | TAF12     | <b>AT3G10070</b> | LTR                     | 917 | - | CCGAAA                          | cis-acting element involved in low-temperature responsiveness              |
|    |           |                  |                         | 950 | - | CCGAAA                          | cis-acting element involved in low-temperature responsiveness              |
|    |           |                  | TC-rich repeats         | 300 | - | ATTTTCTTCA                      | cis-acting element involved in defense and stress responsiveness           |
|    |           |                  |                         | 581 | + | ATTTTCTCCA                      | cis-acting element involved in defense and stress responsiveness           |
|    |           |                  | PRECON<br>SCRHSP<br>70A | 943 |   | SCGAYNRNNNN<br>NNNNNNNNNN<br>HD | Involved in induction of HSP70A gene S=G/C; Y=C/T; R=A/G; H=T/C/A; D=A/T/G |
|    |           |                  |                         | 14  |   | SCGAYNRNNNN<br>NNNNNNNNNN<br>HD | Involved in induction of HSP70A gene S=G/C; Y=C/T; R=A/G; H=T/C/A; D=A/T/G |
| 12 | ENY2      | <b>AT3G27100</b> | ABRE                    | 876 | - | TACGTG                          | cis-acting element involved in the abscisic acid responsiveness            |
|    |           |                  |                         | 943 | - | TACGTG                          | cis-acting element involved in the abscisic acid responsiveness            |
|    |           |                  | LTR                     | 920 | - | CCGAAA                          | cis-acting element involved in low-temperature responsiveness              |
|    |           |                  | MBS                     | 419 | - | TAACTG                          | MYB binding site involved in drought-inducibility                          |
|    |           |                  | TC-rich repeats         | 68  | - | ATTTTCTTCA                      | cis-acting element involved in defense and stress responsiveness           |
|    |           |                  |                         | 557 | + | ATTTTCTTCA                      | cis-acting element involved in defense and stress responsiveness           |
|    |           |                  |                         | 494 | + | ATTTTCTCCA                      | cis-acting element involved in defense and stress responsiveness           |
| 13 | SGF29a    | <b>AT3G27460</b> | ABRE                    | 398 | + | CACGTG                          | cis-acting element involved in the abscisic acid responsiveness            |
|    |           |                  |                         | 399 | + | ACGTGGC                         | cis-acting element involved in the abscisic acid responsiveness            |
|    |           |                  | HSE                     | 646 | + | AAAAAATTTC                      | cis-acting element involved in heat stress responsiveness                  |
|    |           |                  | TC-rich repeats         | 125 | + | ATTTTCTTCA                      | cis-acting element involved in defense and stress responsiveness           |
|    |           |                  |                         | 242 | - | ATTTTCTTCA                      | cis-acting element involved in defense and stress                          |

|    |       |                  |                   |     |   |                                    |                                                                            |
|----|-------|------------------|-------------------|-----|---|------------------------------------|----------------------------------------------------------------------------|
|    |       |                  |                   |     |   |                                    | responsiveness                                                             |
| 14 | GCN5  | <b>AT3G54610</b> | LTR               | 125 | + | CCGAAA                             | cis-acting element involved in low-temperature responsiveness              |
|    |       |                  | MBS               | 775 | + | CGGTCA                             | MYB Binding Site                                                           |
|    |       |                  | CCAATB OX1        | 194 | - | CCAAT                              | Cooperatively with HSEs to increase the hs promoter activity               |
|    |       |                  | PRECON SCRHSP 70A | 754 | - | SCGAYNRNNNNN<br>NNNNNNNNNNNN<br>HD | Involved in induction of HSP70A gene S=G/C; Y=C/T; R=A/G; H=T/C/A; D=A/T/G |
|    |       |                  |                   | 179 | - | SCGAYNRNNNNN<br>NNNNNNNNNNNN<br>HD | Involved in induction of HSP70A gene S=G/C; Y=C/T; R=A/G; H=T/C/A; D=A/T/G |
| 15 | ADA2B | <b>AT4G16420</b> | HSE               | 17  | - | AAAAAATTTTC                        | cis-acting element involved in heat stress responsiveness                  |
|    |       |                  |                   | 860 | + | AAAAAATTTTC                        | cis-acting element involved in heat stress responsiveness                  |
|    |       |                  | TC-rich repeats   | 597 | - | ATTTTCTTCA                         | cis-acting element involved in defense and stress responsiveness           |
|    |       |                  |                   | 896 | + | ATTTTCTTCA                         | cis-acting element involved in defense and stress responsiveness           |
|    |       |                  | MYB1A T           | 561 | + | WAACCA                             | MYB binding site involved in drought-inducibility W=A/T                    |
|    |       |                  |                   | 643 | + | WAACCA                             | MYB binding site involved in drought-inducibility W=A/T                    |
| 16 | ADA3  | <b>AT4G29790</b> | HSE               | 930 | + | AAAAAATTTTC                        | cis-acting element involved in heat stress responsiveness                  |
|    |       |                  | MBS               | 311 | + | GTTTTCTTAC                         | cis-acting element involved in defense and stress responsiveness           |
|    |       |                  | ABRELA TERD1      | 347 | - | ACGTG                              | early responsive to dehydration                                            |
| 17 | TAF10 | <b>AT4G31720</b> | MBS               | 987 | - | CGGTCA                             | MYB Binding Site                                                           |
|    |       |                  | TC-rich repeats   | 371 | - | ATTTTCTCCA                         | cis-acting element involved in defense and stress responsiveness           |
|    |       |                  |                   | 515 | - | ATTTTCTCCA                         | cis-acting element involved in defense and stress responsiveness           |
|    |       |                  | CCAATB OX1        | 529 | + | CCAAT                              | Cooperatively with HSEs to increase the hs promoter activity               |
|    |       |                  | MYB1A T           | 438 | + | WAACCA                             | MYB binding site involved in drought-inducibility W=A/T                    |
| 18 | TRA1B | <b>AT4G36080</b> | HSE               | 716 | - | AGAAAATTCG                         | cis-acting element involved in heat stress responsiveness                  |
|    |       |                  | MBS               | 543 | + | CGGTCA                             | MYB Binding Site                                                           |
|    |       |                  |                   | 712 | - | CGGTCA                             | MYB Binding Site                                                           |
| 19 | UBP22 | <b>AT5G10790</b> | HSE               | 499 | - | AAAAAATTTTC                        | cis-acting element involved in heat stress responsiveness                  |
|    |       |                  |                   | 33  | + | AAAAAATTTTC                        | cis-acting element involved in heat stress responsiveness                  |
|    |       |                  |                   | 265 | - | AAAAAATTTTC                        | cis-acting element involved in heat stress responsiveness                  |
|    |       |                  | LTR               | 39  | - | CCGAAA                             | cis-acting element involved in low-temperature responsiveness              |
|    |       |                  | MBS               | 703 | - | TAACTG                             | MYB binding site involved in drought-inducibility                          |
|    |       |                  |                   | 694 | + | TAACTG                             | MYB binding site involved in drought-inducibility                          |
|    |       |                  | TC-rich repeats   | 504 | + | ATTTTCTCCA                         | cis-acting element involved in defense and stress responsiveness           |
| 20 | TAF5  | <b>AT5G25150</b> | HSE               | 841 | + | AAAAAATTTTC                        | cis-acting element involved in heat stress responsiveness                  |
|    |       |                  |                   | 715 | - | AAAAAATTTTC                        | cis-acting element involved in heat stress responsiveness                  |
|    |       |                  |                   | 814 | + | AAAAAATTTTC                        | cis-acting element involved in heat stress responsiveness                  |
|    |       |                  |                   | 815 | + | AAAAAATTTTC                        | cis-acting element involved in heat stress                                 |

|    |            |                  |                 |     |   |             |                                                                  |
|----|------------|------------------|-----------------|-----|---|-------------|------------------------------------------------------------------|
|    |            |                  |                 |     |   |             | responsiveness                                                   |
|    |            |                  |                 | 774 | + | AAAAAATTTTC | cis-acting element involved in heat stress responsiveness        |
|    |            |                  | MBS             | 525 | - | TAACTG      | MYB binding site involved in drought-inducibility                |
| 21 | SGF29<br>B | <b>AT5G40550</b> | HSE             | 651 | - | AAAAAATTTTC | cis-acting element involved in heat stress responsiveness        |
|    |            |                  |                 | 367 | - | AAAAAATTTTC | cis-acting element involved in heat stress responsiveness        |
|    |            |                  | MBS             | 237 | + | TAACTG      | MYB binding site involved in drought-inducibility                |
|    |            |                  | TC-rich repeats | 435 | - | GTTTCTTAC   | cis-acting element involved in defense and stress responsiveness |
| 22 | SFG11      | <b>AT5G58575</b> | ABRE            | 551 | - | TACGTG      | cis-acting element involved in the abscisic acid responsiveness  |
|    |            |                  | TC-rich repeats | 522 | + | ATTTCTTCA   | cis-acting element involved in defense and stress responsiveness |
|    |            |                  |                 | 104 | - | GTTTCTTAC   | cis-acting element involved in defense and stress responsiveness |
|    |            |                  | CCAATB OX1      | 571 | + | CCAAT       | Cooperatively with HSEs to increase the hs promoter activity     |
| 23 | ADA1B      | <b>AT5G67410</b> | ABRE            | 419 | + | CACGTG      | cis-acting element involved in the abscisic acid responsiveness  |
|    |            |                  | HSE             | 480 | + | AAAAAATTTTC | cis-acting element involved in heat stress responsiveness        |
|    |            |                  |                 | 885 | - | AAAAAATTTTC | cis-acting element involved in heat stress responsiveness        |
